# Supplementary material
Source: publisher figshare collection journal article supplement (https://acs.figshare.com/ndownloader/files/9103564)
Supplement: Supplementary file 1 [file 9103564]

REMARK   Accelrys Discovery Studio PDB file
REMARK   Created:  2017-06-20T17:04:08Z
ATOM      1  N   MET C   1      61.320  51.022  39.918  1.00  0.00           N  
ATOM      2  H1  MET C   1      60.965  50.094  40.129  1.00  0.00           H  
ATOM      3  H2  MET C   1      60.748  51.697  40.408  1.00  0.00           H  
ATOM      4  H3  MET C   1      62.288  51.061  40.196  1.00  0.00           H  
ATOM      5  CA  MET C   1      61.183  51.248  38.472  1.00  0.00           C  
ATOM      6  HA  MET C   1      60.126  51.366  38.242  1.00  0.00           H  
ATOM      7  CB  MET C   1      61.895  52.514  37.961  1.00  0.00           C  
ATOM      8  HB2 MET C   1      61.770  53.309  38.695  1.00  0.00           H  
ATOM      9  HB3 MET C   1      62.960  52.323  37.843  1.00  0.00           H  
ATOM     10  CG  MET C   1      61.320  53.017  36.625  1.00  0.00           C  
ATOM     11  HG2 MET C   1      62.011  53.749  36.206  1.00  0.00           H  
ATOM     12  HG3 MET C   1      61.243  52.194  35.914  1.00  0.00           H  
ATOM     13  SD  MET C   1      59.693  53.803  36.782  1.00  0.00           S  
ATOM     14  CE  MET C   1      59.947  55.383  35.914  1.00  0.00           C  
ATOM     15  HE1 MET C   1      60.344  55.212  34.915  1.00  0.00           H  
ATOM     16  HE2 MET C   1      58.999  55.916  35.831  1.00  0.00           H  
ATOM     17  HE3 MET C   1      60.650  56.002  36.469  1.00  0.00           H  
ATOM     18  C   MET C   1      61.603  49.984  37.779  1.00  0.00           C  
ATOM     19  O   MET C   1      62.635  49.929  37.113  1.00  0.00           O  
ATOM     20  N   GLU C   2      60.721  48.991  37.859  1.00  0.00           N  
ATOM     21  H   GLU C   2      59.882  49.109  38.418  1.00  0.00           H  
ATOM     22  CA  GLU C   2      60.578  48.147  36.694  1.00  0.00           C  
ATOM     23  HA  GLU C   2      61.560  47.834  36.336  1.00  0.00           H  
ATOM     24  CB  GLU C   2      59.723  46.887  36.972  1.00  0.00           C  
ATOM     25  HB2 GLU C   2      59.358  46.914  37.998  1.00  0.00           H  
ATOM     26  HB3 GLU C   2      58.854  46.863  36.311  1.00  0.00           H  
ATOM     27  CG  GLU C   2      60.508  45.574  36.776  1.00  0.00           C  
ATOM     28  HG2 GLU C   2      59.971  44.763  37.273  1.00  0.00           H  
ATOM     29  HG3 GLU C   2      60.542  45.333  35.711  1.00  0.00           H  
ATOM     30  CD  GLU C   2      61.937  45.658  37.331  1.00  0.00           C  
ATOM     31  OE1 GLU C   2      62.090  46.103  38.496  1.00  0.00           O  
ATOM     32  OE2 GLU C   2      62.892  45.340  36.584  1.00  0.00           O  
ATOM     33  C   GLU C   2      60.014  49.106  35.661  1.00  0.00           C  
ATOM     34  O   GLU C   2      58.855  49.504  35.703  1.00  0.00           O  
ATOM     35  N   ARG C   3      60.897  49.504  34.745  1.00  0.00           N  
ATOM     36  H   ARG C   3      61.864  49.341  35.000  1.00  0.00           H  
ATOM     37  CA  ARG C   3      60.590  49.256  33.348  1.00  0.00           C  
ATOM     38  HA  ARG C   3      59.878  49.992  32.989  1.00  0.00           H  
ATOM     39  CB  ARG C   3      61.883  49.358  32.502  1.00  0.00           C  
ATOM     40  HB2 ARG C   3      61.642  49.084  31.474  1.00  0.00           H  
ATOM     41  HB3 ARG C   3      62.189  50.405  32.500  1.00  0.00           H  
ATOM     42  CG  ARG C   3      63.091  48.510  32.975  1.00  0.00           C  
ATOM     43  HG2 ARG C   3      63.247  48.640  34.045  1.00  0.00           H  
ATOM     44  HG3 ARG C   3      62.904  47.453  32.786  1.00  0.00           H  
ATOM     45  CD  ARG C   3      64.398  48.897  32.271  1.00  0.00           C  
ATOM     46  HD2 ARG C   3      64.557  49.972  32.347  1.00  0.00           H  
ATOM     47  HD3 ARG C   3      65.221  48.398  32.786  1.00  0.00           H  
ATOM     48  NE  ARG C   3      64.396  48.448  30.871  1.00  0.00           N  
ATOM     49  HE  ARG C   3      64.524  47.456  30.727  1.00  0.00           H  
ATOM     50  CZ  ARG C   3      64.137  49.159  29.791  1.00  0.00           C  
ATOM     51  NH1 ARG C   3      63.989  50.451  29.785  1.00  0.00           N  
ATOM     52 1HH1 ARG C   3      64.129  51.006  30.621  1.00  0.00           H  
ATOM     53 2HH1 ARG C   3      63.771  50.905  28.907  1.00  0.00           H  
ATOM     54  NH2 ARG C   3      64.013  48.553  28.652  1.00  0.00           N  
ATOM     55 1HH2 ARG C   3      63.755  49.120  27.847  1.00  0.00           H  
ATOM     56 2HH2 ARG C   3      64.072  47.543  28.622  1.00  0.00           H  
ATOM     57  C   ARG C   3      59.941  47.865  33.310  1.00  0.00           C  
ATOM     58  O   ARG C   3      60.643  46.889  33.575  1.00  0.00           O  
ATOM     59  N   PRO C   4      58.619  47.737  33.074  1.00  0.00           N  
ATOM     60  CD  PRO C   4      57.667  48.796  32.841  1.00  0.00           C  
ATOM     61  HD2 PRO C   4      57.943  49.323  31.930  1.00  0.00           H  
ATOM     62  HD3 PRO C   4      57.642  49.462  33.695  1.00  0.00           H  
ATOM     63  CG  PRO C   4      56.303  48.142  32.674  1.00  0.00           C  
ATOM     64  HG2 PRO C   4      55.717  48.655  31.912  1.00  0.00           H  
ATOM     65  HG3 PRO C   4      55.778  48.162  33.630  1.00  0.00           H  
ATOM     66  CB  PRO C   4      56.610  46.695  32.278  1.00  0.00           C  
ATOM     67  HB2 PRO C   4      56.418  46.547  31.218  1.00  0.00           H  
ATOM     68  HB3 PRO C   4      55.983  46.019  32.860  1.00  0.00           H  
ATOM     69  CA  PRO C   4      58.095  46.472  32.610  1.00  0.00           C  
ATOM     70  HA  PRO C   4      58.186  45.737  33.410  1.00  0.00           H  
ATOM     71  C   PRO C   4      59.009  46.125  31.420  1.00  0.00           C  
ATOM     72  O   PRO C   4      59.382  47.020  30.659  1.00  0.00           O  
ATOM     73  N   PRO C   5      59.563  44.915  31.341  1.00  0.00           N  
ATOM     74  CD  PRO C   5      59.171  43.737  32.074  1.00  0.00           C  
ATOM     75  HD2 PRO C   5      58.086  43.627  32.094  1.00  0.00           H  
ATOM     76  HD3 PRO C   5      59.572  43.788  33.088  1.00  0.00           H  
ATOM     77  CG  PRO C   5      59.823  42.602  31.293  1.00  0.00           C  
ATOM     78  HG2 PRO C   5      59.205  42.366  30.426  1.00  0.00           H  
ATOM     79  HG3 PRO C   5      59.980  41.723  31.917  1.00  0.00           H  
ATOM     80  CB  PRO C   5      61.143  43.228  30.828  1.00  0.00           C  
ATOM     81  HB2 PRO C   5      61.550  42.726  29.950  1.00  0.00           H  
ATOM     82  HB3 PRO C   5      61.862  43.212  31.649  1.00  0.00           H  
ATOM     83  CA  PRO C   5      60.757  44.676  30.533  1.00  0.00           C  
ATOM     84  HA  PRO C   5      61.555  45.341  30.871  1.00  0.00           H  
ATOM     85  C   PRO C   5      60.476  44.953  29.051  1.00  0.00           C  
ATOM     86  O   PRO C   5      59.393  44.637  28.559  1.00  0.00           O  
ATOM     87  N   GLY C   6      61.409  45.602  28.346  1.00  0.00           N  
ATOM     88  H   GLY C   6      62.287  45.825  28.800  1.00  0.00           H  
ATOM     89  CA  GLY C   6      61.194  46.089  26.969  1.00  0.00           C  
ATOM     90  HA2 GLY C   6      62.093  46.604  26.630  1.00  0.00           H  
ATOM     91  HA3 GLY C   6      61.006  45.243  26.312  1.00  0.00           H  
ATOM     92  C   GLY C   6      60.024  47.071  26.810  1.00  0.00           C  
ATOM     93  O   GLY C   6      59.612  47.369  25.693  1.00  0.00           O  
ATOM     94  N   LEU C   7      59.478  47.566  27.919  1.00  0.00           N  
ATOM     95  H   LEU C   7      59.867  47.296  28.816  1.00  0.00           H  
ATOM     96  CA  LEU C   7      58.374  48.496  27.980  1.00  0.00           C  
ATOM     97  HA  LEU C   7      58.140  48.826  26.971  1.00  0.00           H  
ATOM     98  CB  LEU C   7      57.118  47.843  28.607  1.00  0.00           C  
ATOM     99  HB2 LEU C   7      57.426  47.149  29.376  1.00  0.00           H  
ATOM    100  HB3 LEU C   7      56.504  48.603  29.095  1.00  0.00           H  
ATOM    101  CG  LEU C   7      56.244  47.062  27.623  1.00  0.00           C  
ATOM    102  HG  LEU C   7      56.857  46.337  27.089  1.00  0.00           H  
ATOM    103  CD1 LEU C   7      55.145  46.317  28.386  1.00  0.00           C  
ATOM    104 1HD1 LEU C   7      54.509  47.023  28.920  1.00  0.00           H  
ATOM    105 2HD1 LEU C   7      54.542  45.744  27.683  1.00  0.00           H  
ATOM    106 3HD1 LEU C   7      55.597  45.625  29.097  1.00  0.00           H  
ATOM    107  CD2 LEU C   7      55.567  48.006  26.626  1.00  0.00           C  
ATOM    108 1HD2 LEU C   7      56.314  48.463  25.978  1.00  0.00           H  
ATOM    109 2HD2 LEU C   7      54.883  47.437  26.001  1.00  0.00           H  
ATOM    110 3HD2 LEU C   7      55.015  48.781  27.158  1.00  0.00           H  
ATOM    111  C   LEU C   7      58.788  49.739  28.742  1.00  0.00           C  
ATOM    112  O   LEU C   7      59.673  49.782  29.599  1.00  0.00           O  
ATOM    113  N   ARG C   8      58.037  50.777  28.422  1.00  0.00           N  
ATOM    114  H   ARG C   8      57.314  50.626  27.737  1.00  0.00           H  
ATOM    115  CA  ARG C   8      57.978  51.979  29.215  1.00  0.00           C  
ATOM    116  HA  ARG C   8      58.970  52.419  29.281  1.00  0.00           H  
ATOM    117  CB  ARG C   8      56.998  52.919  28.530  1.00  0.00           C  
ATOM    118  HB2 ARG C   8      56.073  52.382  28.311  1.00  0.00           H  
ATOM    119  HB3 ARG C   8      56.778  53.695  29.253  1.00  0.00           H  
ATOM    120  CG  ARG C   8      57.552  53.500  27.223  1.00  0.00           C  
ATOM    121  HG2 ARG C   8      58.057  52.714  26.659  1.00  0.00           H  
ATOM    122  HG3 ARG C   8      56.737  53.874  26.604  1.00  0.00           H  
ATOM    123  CD  ARG C   8      58.554  54.621  27.510  1.00  0.00           C  
ATOM    124  HD2 ARG C   8      59.000  54.499  28.499  1.00  0.00           H  
ATOM    125  HD3 ARG C   8      59.363  54.534  26.780  1.00  0.00           H  
ATOM    126  NE  ARG C   8      57.983  55.973  27.383  1.00  0.00           N  
ATOM    127  HE  ARG C   8      58.544  56.605  26.832  1.00  0.00           H  
ATOM    128  CZ  ARG C   8      56.905  56.523  27.914  1.00  0.00           C  
ATOM    129  NH1 ARG C   8      56.724  57.783  27.740  1.00  0.00           N  
ATOM    130 1HH1 ARG C   8      55.943  58.241  28.190  1.00  0.00           H  
ATOM    131 2HH1 ARG C   8      57.294  58.279  27.073  1.00  0.00           H  
ATOM    132  NH2 ARG C   8      55.982  55.922  28.605  1.00  0.00           N  
ATOM    133 1HH2 ARG C   8      55.993  54.927  28.703  1.00  0.00           H  
ATOM    134 2HH2 ARG C   8      55.177  56.427  28.943  1.00  0.00           H  
ATOM    135  C   ARG C   8      57.447  51.638  30.603  1.00  0.00           C  
ATOM    136  O   ARG C   8      56.343  51.089  30.681  1.00  0.00           O  
ATOM    137  N   PRO C   9      58.129  52.025  31.692  1.00  0.00           N  
ATOM    138  CD  PRO C   9      59.474  52.581  31.789  1.00  0.00           C  
ATOM    139  HD2 PRO C   9      59.695  53.279  30.984  1.00  0.00           H  
ATOM    140  HD3 PRO C   9      60.207  51.773  31.791  1.00  0.00           H  
ATOM    141  CG  PRO C   9      59.516  53.329  33.119  1.00  0.00           C  
ATOM    142  HG2 PRO C   9      59.229  54.369  32.956  1.00  0.00           H  
ATOM    143  HG3 PRO C   9      60.502  53.268  33.582  1.00  0.00           H  
ATOM    144  CB  PRO C   9      58.450  52.637  33.966  1.00  0.00           C  
ATOM    145  HB2 PRO C   9      57.998  53.308  34.694  1.00  0.00           H  
ATOM    146  HB3 PRO C   9      58.886  51.770  34.461  1.00  0.00           H  
ATOM    147  CA  PRO C   9      57.420  52.179  32.946  1.00  0.00           C  
ATOM    148  HA  PRO C   9      56.985  51.243  33.272  1.00  0.00           H  
ATOM    149  C   PRO C   9      56.279  53.173  32.759  1.00  0.00           C  
ATOM    150  O   PRO C   9      56.461  54.271  32.230  1.00  0.00           O  
ATOM    151  N   GLY C  10      55.097  52.753  33.196  1.00  0.00           N  
ATOM    152  H   GLY C  10      55.064  51.841  33.630  1.00  0.00           H  
ATOM    153  CA  GLY C  10      54.014  53.661  33.521  1.00  0.00           C  
ATOM    154  HA2 GLY C  10      54.093  54.582  32.941  1.00  0.00           H  
ATOM    155  HA3 GLY C  10      53.050  53.192  33.326  1.00  0.00           H  
ATOM    156  C   GLY C  10      54.139  53.961  35.004  1.00  0.00           C  
ATOM    157  O   GLY C  10      54.157  53.035  35.814  1.00  0.00           O  
ATOM    158  N   ALA C  11      54.278  55.229  35.362  1.00  0.00           N  
ATOM    159  H   ALA C  11      54.244  55.952  34.657  1.00  0.00           H  
ATOM    160  CA  ALA C  11      54.306  55.671  36.746  1.00  0.00           C  
ATOM    161  HA  ALA C  11      53.795  54.928  37.358  1.00  0.00           H  
ATOM    162  CB  ALA C  11      55.758  55.791  37.236  1.00  0.00           C  
ATOM    163  HB1 ALA C  11      56.285  56.550  36.657  1.00  0.00           H  
ATOM    164  HB2 ALA C  11      55.761  56.078  38.288  1.00  0.00           H  
ATOM    165  HB3 ALA C  11      56.268  54.833  37.131  1.00  0.00           H  
ATOM    166  C   ALA C  11      53.535  56.984  36.868  1.00  0.00           C  
ATOM    167  O   ALA C  11      53.497  57.779  35.930  1.00  0.00           O  
ATOM    168  N   GLY C  12      52.925  57.204  38.026  1.00  0.00           N  
ATOM    169  H   GLY C  12      52.996  56.491  38.748  1.00  0.00           H  
ATOM    170  CA  GLY C  12      52.138  58.399  38.305  1.00  0.00           C  
ATOM    171  HA2 GLY C  12      52.658  59.274  37.912  1.00  0.00           H  
ATOM    172  HA3 GLY C  12      51.166  58.326  37.815  1.00  0.00           H  
ATOM    173  C   GLY C  12      51.933  58.552  39.804  1.00  0.00           C  
ATOM    174  O   GLY C  12      51.362  57.674  40.459  1.00  0.00           O  
ATOM    175  N   GLY C  13      52.450  59.646  40.364  1.00  0.00           N  
ATOM    176  H   GLY C  13      52.945  60.306  39.779  1.00  0.00           H  
ATOM    177  CA  GLY C  13      52.512  59.822  41.814  1.00  0.00           C  
ATOM    178  HA2 GLY C  13      53.009  60.760  42.050  1.00  0.00           H  
ATOM    179  HA3 GLY C  13      51.494  59.869  42.194  1.00  0.00           H  
ATOM    180  C   GLY C  13      53.301  58.677  42.479  1.00  0.00           C  
ATOM    181  O   GLY C  13      54.422  58.385  42.051  1.00  0.00           O  
ATOM    182  N   PRO C  14      52.746  58.001  43.501  1.00  0.00           N  
ATOM    183  CD  PRO C  14      51.492  58.322  44.172  1.00  0.00           C  
ATOM    184  HD2 PRO C  14      50.643  58.221  43.494  1.00  0.00           H  
ATOM    185  HD3 PRO C  14      51.538  59.339  44.565  1.00  0.00           H  
ATOM    186  CG  PRO C  14      51.361  57.334  45.330  1.00  0.00           C  
ATOM    187  HG2 PRO C  14      50.765  56.476  45.021  1.00  0.00           H  
ATOM    188  HG3 PRO C  14      50.921  57.809  46.205  1.00  0.00           H  
ATOM    189  CB  PRO C  14      52.799  56.891  45.583  1.00  0.00           C  
ATOM    190  HB2 PRO C  14      52.848  55.907  46.043  1.00  0.00           H  
ATOM    191  HB3 PRO C  14      53.308  57.623  46.211  1.00  0.00           H  
ATOM    192  CA  PRO C  14      53.412  56.894  44.183  1.00  0.00           C  
ATOM    193  HA  PRO C  14      54.479  57.094  44.267  1.00  0.00           H  
ATOM    194  C   PRO C  14      53.245  55.527  43.493  1.00  0.00           C  
ATOM    195  O   PRO C  14      53.770  54.544  44.011  1.00  0.00           O  
ATOM    196  N   TRP C  15      52.527  55.420  42.369  1.00  0.00           N  
ATOM    197  H   TRP C  15      52.180  56.260  41.923  1.00  0.00           H  
ATOM    198  CA  TRP C  15      52.219  54.136  41.720  1.00  0.00           C  
ATOM    199  HA  TRP C  15      52.425  53.325  42.420  1.00  0.00           H  
ATOM    200  CB  TRP C  15      50.726  54.060  41.384  1.00  0.00           C  
ATOM    201  HB2 TRP C  15      50.475  54.888  40.722  1.00  0.00           H  
ATOM    202  HB3 TRP C  15      50.538  53.134  40.839  1.00  0.00           H  
ATOM    203  CG  TRP C  15      49.807  54.088  42.566  1.00  0.00           C  
ATOM    204  CD1 TRP C  15      49.219  55.195  43.070  1.00  0.00           C  
ATOM    205  HD1 TRP C  15      49.358  56.190  42.670  1.00  0.00           H  
ATOM    206  NE1 TRP C  15      48.441  54.858  44.160  1.00  0.00           N  
ATOM    207  HE1 TRP C  15      47.892  55.524  44.687  1.00  0.00           H  
ATOM    208  CE2 TRP C  15      48.502  53.507  44.425  1.00  0.00           C  
ATOM    209  CZ2 TRP C  15      47.916  52.698  45.410  1.00  0.00           C  
ATOM    210  HZ2 TRP C  15      47.260  53.131  46.151  1.00  0.00           H  
ATOM    211  CH2 TRP C  15      48.182  51.319  45.407  1.00  0.00           C  
ATOM    212  HH2 TRP C  15      47.734  50.679  46.155  1.00  0.00           H  
ATOM    213  CZ3 TRP C  15      49.021  50.769  44.420  1.00  0.00           C  
ATOM    214  HZ3 TRP C  15      49.213  49.705  44.412  1.00  0.00           H  
ATOM    215  CE3 TRP C  15      49.603  51.591  43.436  1.00  0.00           C  
ATOM    216  HE3 TRP C  15      50.239  51.157  42.680  1.00  0.00           H  
ATOM    217  CD2 TRP C  15      49.365  52.983  43.415  1.00  0.00           C  
ATOM    218  C   TRP C  15      53.080  53.878  40.480  1.00  0.00           C  
ATOM    219  O   TRP C  15      53.418  54.801  39.740  1.00  0.00           O  
ATOM    220  N   GLU C  16      53.405  52.606  40.244  1.00  0.00           N  
ATOM    221  H   GLU C  16      53.146  51.914  40.941  1.00  0.00           H  
ATOM    222  CA  GLU C  16      54.278  52.131  39.164  1.00  0.00           C  
ATOM    223  HA  GLU C  16      54.313  52.872  38.364  1.00  0.00           H  
ATOM    224  CB  GLU C  16      55.687  51.976  39.758  1.00  0.00           C  
ATOM    225  HB2 GLU C  16      55.966  52.925  40.219  1.00  0.00           H  
ATOM    226  HB3 GLU C  16      55.661  51.217  40.541  1.00  0.00           H  
ATOM    227  CG  GLU C  16      56.779  51.607  38.753  1.00  0.00           C  
ATOM    228  HG2 GLU C  16      56.521  50.670  38.258  1.00  0.00           H  
ATOM    229  HG3 GLU C  16      56.851  52.390  37.995  1.00  0.00           H  
ATOM    230  CD  GLU C  16      58.121  51.457  39.479  1.00  0.00           C  
ATOM    231  OE1 GLU C  16      58.773  52.481  39.800  1.00  0.00           O  
ATOM    232  OE2 GLU C  16      58.573  50.312  39.735  1.00  0.00           O  
ATOM    233  C   GLU C  16      53.751  50.805  38.584  1.00  0.00           C  
ATOM    234  O   GLU C  16      53.344  49.917  39.334  1.00  0.00           O  
ATOM    235  N   MET C  17      53.734  50.667  37.257  1.00  0.00           N  
ATOM    236  H   MET C  17      54.083  51.437  36.695  1.00  0.00           H  
ATOM    237  CA  MET C  17      53.261  49.473  36.543  1.00  0.00           C  
ATOM    238  HA  MET C  17      52.323  49.156  37.001  1.00  0.00           H  
ATOM    239  CB  MET C  17      52.978  49.838  35.073  1.00  0.00           C  
ATOM    240  HB2 MET C  17      52.516  50.825  35.045  1.00  0.00           H  
ATOM    241  HB3 MET C  17      53.915  49.897  34.516  1.00  0.00           H  
ATOM    242  CG  MET C  17      52.015  48.874  34.366  1.00  0.00           C  
ATOM    243  HG2 MET C  17      51.178  48.664  35.033  1.00  0.00           H  
ATOM    244  HG3 MET C  17      51.609  49.392  33.497  1.00  0.00           H  
ATOM    245  SD  MET C  17      52.719  47.297  33.800  1.00  0.00           S  
ATOM    246  CE  MET C  17      52.518  47.460  32.006  1.00  0.00           C  
ATOM    247  HE1 MET C  17      53.060  48.337  31.652  1.00  0.00           H  
ATOM    248  HE2 MET C  17      52.912  46.571  31.515  1.00  0.00           H  
ATOM    249  HE3 MET C  17      51.460  47.565  31.765  1.00  0.00           H  
ATOM    250  C   MET C  17      54.275  48.329  36.667  1.00  0.00           C  
ATOM    251  O   MET C  17      55.478  48.556  36.542  1.00  0.00           O  
ATOM    252  N   ARG C  18      53.803  47.100  36.905  1.00  0.00           N  
ATOM    253  H   ARG C  18      52.797  46.998  37.006  1.00  0.00           H  
ATOM    254  CA  ARG C  18      54.660  45.917  37.105  1.00  0.00           C  
ATOM    255  HA  ARG C  18      55.687  46.181  36.860  1.00  0.00           H  
ATOM    256  CB  ARG C  18      54.594  45.478  38.584  1.00  0.00           C  
ATOM    257  HB2 ARG C  18      53.549  45.339  38.868  1.00  0.00           H  
ATOM    258  HB3 ARG C  18      55.099  44.516  38.693  1.00  0.00           H  
ATOM    259  CG  ARG C  18      55.246  46.477  39.560  1.00  0.00           C  
ATOM    260  HG2 ARG C  18      54.757  47.448  39.475  1.00  0.00           H  
ATOM    261  HG3 ARG C  18      55.107  46.111  40.578  1.00  0.00           H  
ATOM    262  CD  ARG C  18      56.750  46.631  39.290  1.00  0.00           C  
ATOM    263  HD2 ARG C  18      57.241  45.664  39.415  1.00  0.00           H  
ATOM    264  HD3 ARG C  18      56.902  46.951  38.260  1.00  0.00           H  
ATOM    265  NE  ARG C  18      57.383  47.646  40.145  1.00  0.00           N  
ATOM    266  HE  ARG C  18      57.449  48.585  39.766  1.00  0.00           H  
ATOM    267  CZ  ARG C  18      58.101  47.438  41.229  1.00  0.00           C  
ATOM    268  NH1 ARG C  18      58.175  46.300  41.853  1.00  0.00           N  
ATOM    269 1HH1 ARG C  18      57.635  45.496  41.561  1.00  0.00           H  
ATOM    270 2HH1 ARG C  18      58.832  46.211  42.614  1.00  0.00           H  
ATOM    271  NH2 ARG C  18      58.798  48.416  41.712  1.00  0.00           N  
ATOM    272 1HH2 ARG C  18      58.793  49.278  41.170  1.00  0.00           H  
ATOM    273 2HH2 ARG C  18      59.442  48.244  42.463  1.00  0.00           H  
ATOM    274  C   ARG C  18      54.388  44.754  36.159  1.00  0.00           C  
ATOM    275  O   ARG C  18      55.337  44.082  35.770  1.00  0.00           O  
ATOM    276  N   GLU C  19      53.140  44.504  35.767  1.00  0.00           N  
ATOM    277  H   GLU C  19      52.395  45.118  36.065  1.00  0.00           H  
ATOM    278  CA  GLU C  19      52.809  43.371  34.892  1.00  0.00           C  
ATOM    279  HA  GLU C  19      53.609  43.259  34.158  1.00  0.00           H  
ATOM    280  CB  GLU C  19      52.768  42.086  35.748  1.00  0.00           C  
ATOM    281  HB2 GLU C  19      53.714  41.999  36.285  1.00  0.00           H  
ATOM    282  HB3 GLU C  19      51.967  42.159  36.484  1.00  0.00           H  
ATOM    283  CG  GLU C  19      52.573  40.813  34.923  1.00  0.00           C  
ATOM    284  HG2 GLU C  19      51.513  40.704  34.699  1.00  0.00           H  
ATOM    285  HG3 GLU C  19      53.116  40.908  33.979  1.00  0.00           H  
ATOM    286  CD  GLU C  19      53.067  39.571  35.668  1.00  0.00           C  
ATOM    287  OE1 GLU C  19      54.107  38.999  35.250  1.00  0.00           O  
ATOM    288  OE2 GLU C  19      52.397  39.108  36.613  1.00  0.00           O  
ATOM    289  C   GLU C  19      51.498  43.583  34.115  1.00  0.00           C  
ATOM    290  O   GLU C  19      50.575  44.230  34.607  1.00  0.00           O  
ATOM    291  N   ARG C  20      51.387  42.998  32.914  1.00  0.00           N  
ATOM    292  H   ARG C  20      52.173  42.456  32.584  1.00  0.00           H  
ATOM    293  CA  ARG C  20      50.106  42.820  32.208  1.00  0.00           C  
ATOM    294  HA  ARG C  20      49.398  43.571  32.564  1.00  0.00           H  
ATOM    295  CB  ARG C  20      50.268  42.975  30.686  1.00  0.00           C  
ATOM    296  HB2 ARG C  20      51.274  42.688  30.373  1.00  0.00           H  
ATOM    297  HB3 ARG C  20      49.555  42.316  30.188  1.00  0.00           H  
ATOM    298  CG  ARG C  20      49.962  44.411  30.254  1.00  0.00           C  
ATOM    299  HG2 ARG C  20      49.038  44.716  30.739  1.00  0.00           H  
ATOM    300  HG3 ARG C  20      50.767  45.082  30.560  1.00  0.00           H  
ATOM    301  CD  ARG C  20      49.713  44.518  28.752  1.00  0.00           C  
ATOM    302  HD2 ARG C  20      48.945  43.794  28.478  1.00  0.00           H  
ATOM    303  HD3 ARG C  20      49.325  45.520  28.556  1.00  0.00           H  
ATOM    304  NE  ARG C  20      50.914  44.273  27.938  1.00  0.00           N  
ATOM    305  HE  ARG C  20      51.596  43.593  28.259  1.00  0.00           H  
ATOM    306  CZ  ARG C  20      51.156  44.791  26.750  1.00  0.00           C  
ATOM    307  NH1 ARG C  20      50.348  45.617  26.153  1.00  0.00           N  
ATOM    308 1HH1 ARG C  20      49.447  45.812  26.554  1.00  0.00           H  
ATOM    309 2HH1 ARG C  20      50.620  45.948  25.234  1.00  0.00           H  
ATOM    310  NH2 ARG C  20      52.247  44.487  26.126  1.00  0.00           N  
ATOM    311 1HH2 ARG C  20      52.857  43.788  26.530  1.00  0.00           H  
ATOM    312 2HH2 ARG C  20      52.383  44.863  25.196  1.00  0.00           H  
ATOM    313  C   ARG C  20      49.484  41.469  32.538  1.00  0.00           C  
ATOM    314  O   ARG C  20      50.178  40.452  32.520  1.00  0.00           O  
ATOM    315  N   LEU C  21      48.178  41.465  32.784  1.00  0.00           N  
ATOM    316  H   LEU C  21      47.667  42.338  32.696  1.00  0.00           H  
ATOM    317  CA  LEU C  21      47.392  40.295  33.160  1.00  0.00           C  
ATOM    318  HA  LEU C  21      48.046  39.424  33.227  1.00  0.00           H  
ATOM    319  CB  LEU C  21      46.750  40.528  34.539  1.00  0.00           C  
ATOM    320  HB2 LEU C  21      46.089  41.385  34.453  1.00  0.00           H  
ATOM    321  HB3 LEU C  21      46.141  39.658  34.796  1.00  0.00           H  
ATOM    322  CG  LEU C  21      47.725  40.811  35.695  1.00  0.00           C  
ATOM    323  HG  LEU C  21      48.356  41.665  35.447  1.00  0.00           H  
ATOM    324  CD1 LEU C  21      46.912  41.169  36.938  1.00  0.00           C  
ATOM    325 1HD1 LEU C  21      46.266  40.335  37.210  1.00  0.00           H  
ATOM    326 2HD1 LEU C  21      47.583  41.396  37.765  1.00  0.00           H  
ATOM    327 3HD1 LEU C  21      46.295  42.044  36.734  1.00  0.00           H  
ATOM    328  CD2 LEU C  21      48.617  39.610  36.013  1.00  0.00           C  
ATOM    329 1HD2 LEU C  21      49.254  39.381  35.160  1.00  0.00           H  
ATOM    330 2HD2 LEU C  21      49.264  39.845  36.857  1.00  0.00           H  
ATOM    331 3HD2 LEU C  21      48.004  38.742  36.255  1.00  0.00           H  
ATOM    332  C   LEU C  21      46.327  39.983  32.100  1.00  0.00           C  
ATOM    333  O   LEU C  21      45.834  40.869  31.390  1.00  0.00           O  
ATOM    334  N   GLY C  22      45.970  38.704  32.016  1.00  0.00           N  
ATOM    335  H   GLY C  22      46.390  38.030  32.641  1.00  0.00           H  
ATOM    336  CA  GLY C  22      45.143  38.179  30.942  1.00  0.00           C  
ATOM    337  HA2 GLY C  22      44.623  37.289  31.288  1.00  0.00           H  
ATOM    338  HA3 GLY C  22      44.397  38.919  30.661  1.00  0.00           H  
ATOM    339  C   GLY C  22      45.929  37.822  29.685  1.00  0.00           C  
ATOM    340  O   GLY C  22      47.141  38.015  29.577  1.00  0.00           O  
ATOM    341  N   THR C  23      45.193  37.291  28.717  1.00  0.00           N  
ATOM    342  H   THR C  23      44.203  37.185  28.885  1.00  0.00           H  
ATOM    343  CA  THR C  23      45.669  36.947  27.374  1.00  0.00           C  
ATOM    344  HA  THR C  23      46.748  36.792  27.406  1.00  0.00           H  
ATOM    345  CB  THR C  23      45.010  35.641  26.898  1.00  0.00           C  
ATOM    346  HB  THR C  23      45.311  35.442  25.869  1.00  0.00           H  
ATOM    347  CG2 THR C  23      45.422  34.449  27.761  1.00  0.00           C  
ATOM    348 1HG2 THR C  23      45.075  34.582  28.787  1.00  0.00           H  
ATOM    349 2HG2 THR C  23      44.995  33.534  27.354  1.00  0.00           H  
ATOM    350 3HG2 THR C  23      46.508  34.357  27.766  1.00  0.00           H  
ATOM    351  OG1 THR C  23      43.602  35.754  26.958  1.00  0.00           O  
ATOM    352  HG1 THR C  23      43.240  34.890  26.726  1.00  0.00           H  
ATOM    353  C   THR C  23      45.397  38.072  26.368  1.00  0.00           C  
ATOM    354  O   THR C  23      44.610  38.985  26.634  1.00  0.00           O  
ATOM    355  N   GLY C  24      46.017  37.976  25.190  1.00  0.00           N  
ATOM    356  H   GLY C  24      46.681  37.230  25.062  1.00  0.00           H  
ATOM    357  CA  GLY C  24      45.875  38.942  24.099  1.00  0.00           C  
ATOM    358  HA2 GLY C  24      45.910  38.408  23.150  1.00  0.00           H  
ATOM    359  HA3 GLY C  24      44.911  39.447  24.164  1.00  0.00           H  
ATOM    360  C   GLY C  24      46.978  40.003  24.113  1.00  0.00           C  
ATOM    361  O   GLY C  24      47.515  40.341  25.166  1.00  0.00           O  
ATOM    362  N   GLY C  25      47.319  40.541  22.940  1.00  0.00           N  
ATOM    363  H   GLY C  25      46.846  40.210  22.111  1.00  0.00           H  
ATOM    364  CA  GLY C  25      48.503  41.394  22.748  1.00  0.00           C  
ATOM    365  HA2 GLY C  25      49.404  40.821  22.962  1.00  0.00           H  
ATOM    366  HA3 GLY C  25      48.524  41.701  21.706  1.00  0.00           H  
ATOM    367  C   GLY C  25      48.535  42.685  23.574  1.00  0.00           C  
ATOM    368  O   GLY C  25      49.605  43.207  23.878  1.00  0.00           O  
ATOM    369  N   PHE C  26      47.359  43.185  23.961  1.00  0.00           N  
ATOM    370  H   PHE C  26      46.528  42.697  23.670  1.00  0.00           H  
ATOM    371  CA  PHE C  26      47.204  44.364  24.814  1.00  0.00           C  
ATOM    372  HA  PHE C  26      48.112  44.964  24.744  1.00  0.00           H  
ATOM    373  CB  PHE C  26      46.035  45.214  24.288  1.00  0.00           C  
ATOM    374  HB2 PHE C  26      45.548  44.713  23.448  1.00  0.00           H  
ATOM    375  HB3 PHE C  26      45.278  45.321  25.067  1.00  0.00           H  
ATOM    376  CG  PHE C  26      46.468  46.590  23.839  1.00  0.00           C  
ATOM    377  CD1 PHE C  26      46.393  47.677  24.729  1.00  0.00           C  
ATOM    378  HD1 PHE C  26      46.018  47.534  25.735  1.00  0.00           H  
ATOM    379  CE1 PHE C  26      46.824  48.951  24.319  1.00  0.00           C  
ATOM    380  HE1 PHE C  26      46.778  49.781  25.011  1.00  0.00           H  
ATOM    381  CZ  PHE C  26      47.330  49.139  23.021  1.00  0.00           C  
ATOM    382  HZ  PHE C  26      47.669  50.117  22.706  1.00  0.00           H  
ATOM    383  CE2 PHE C  26      47.417  48.051  22.134  1.00  0.00           C  
ATOM    384  HE2 PHE C  26      47.826  48.194  21.142  1.00  0.00           H  
ATOM    385  CD2 PHE C  26      46.988  46.777  22.543  1.00  0.00           C  
ATOM    386  HD2 PHE C  26      47.074  45.938  21.866  1.00  0.00           H  
ATOM    387  C   PHE C  26      47.017  44.033  26.302  1.00  0.00           C  
ATOM    388  O   PHE C  26      47.193  44.919  27.136  1.00  0.00           O  
ATOM    389  N   GLY C  27      46.662  42.786  26.636  1.00  0.00           N  
ATOM    390  H   GLY C  27      46.704  42.068  25.924  1.00  0.00           H  
ATOM    391  CA  GLY C  27      46.017  42.428  27.901  1.00  0.00           C  
ATOM    392  HA2 GLY C  27      45.908  41.343  27.950  1.00  0.00           H  
ATOM    393  HA3 GLY C  27      46.645  42.744  28.734  1.00  0.00           H  
ATOM    394  C   GLY C  27      44.622  43.057  28.069  1.00  0.00           C  
ATOM    395  O   GLY C  27      44.075  43.682  27.158  1.00  0.00           O  
ATOM    396  N   ASN C  28      44.043  42.882  29.260  1.00  0.00           N  
ATOM    397  H   ASN C  28      44.536  42.309  29.932  1.00  0.00           H  
ATOM    398  CA  ASN C  28      42.762  43.493  29.658  1.00  0.00           C  
ATOM    399  HA  ASN C  28      42.451  44.203  28.893  1.00  0.00           H  
ATOM    400  CB  ASN C  28      41.717  42.356  29.719  1.00  0.00           C  
ATOM    401  HB2 ASN C  28      41.988  41.596  28.987  1.00  0.00           H  
ATOM    402  HB3 ASN C  28      41.750  41.896  30.702  1.00  0.00           H  
ATOM    403  CG  ASN C  28      40.274  42.754  29.429  1.00  0.00           C  
ATOM    404  OD1 ASN C  28      39.363  41.951  29.323  1.00  0.00           O  
ATOM    405  ND2 ASN C  28      40.017  44.033  29.303  1.00  0.00           N  
ATOM    406 1HD2 ASN C  28      39.057  44.303  29.123  1.00  0.00           H  
ATOM    407 2HD2 ASN C  28      40.748  44.721  29.468  1.00  0.00           H  
ATOM    408  C   ASN C  28      42.892  44.299  30.970  1.00  0.00           C  
ATOM    409  O   ASN C  28      42.206  45.304  31.173  1.00  0.00           O  
ATOM    410  N   VAL C  29      43.828  43.903  31.835  1.00  0.00           N  
ATOM    411  H   VAL C  29      44.387  43.095  31.600  1.00  0.00           H  
ATOM    412  CA  VAL C  29      44.187  44.589  33.086  1.00  0.00           C  
ATOM    413  HA  VAL C  29      43.846  45.621  33.028  1.00  0.00           H  
ATOM    414  CB  VAL C  29      43.532  43.928  34.322  1.00  0.00           C  
ATOM    415  HB  VAL C  29      43.978  44.352  35.222  1.00  0.00           H  
ATOM    416  CG1 VAL C  29      42.028  44.217  34.377  1.00  0.00           C  
ATOM    417 1HG1 VAL C  29      41.550  43.872  33.459  1.00  0.00           H  
ATOM    418 2HG1 VAL C  29      41.583  43.699  35.227  1.00  0.00           H  
ATOM    419 3HG1 VAL C  29      41.864  45.285  34.497  1.00  0.00           H  
ATOM    420  CG2 VAL C  29      43.702  42.405  34.378  1.00  0.00           C  
ATOM    421 1HG2 VAL C  29      44.702  42.114  34.070  1.00  0.00           H  
ATOM    422 2HG2 VAL C  29      43.527  42.056  35.395  1.00  0.00           H  
ATOM    423 3HG2 VAL C  29      42.981  41.928  33.714  1.00  0.00           H  
ATOM    424  C   VAL C  29      45.707  44.645  33.256  1.00  0.00           C  
ATOM    425  O   VAL C  29      46.429  43.734  32.849  1.00  0.00           O  
ATOM    426  N   CYS C  30      46.200  45.709  33.888  1.00  0.00           N  
ATOM    427  H   CYS C  30      45.547  46.429  34.179  1.00  0.00           H  
ATOM    428  CA  CYS C  30      47.588  45.846  34.333  1.00  0.00           C  
ATOM    429  HA  CYS C  30      48.171  44.990  33.995  1.00  0.00           H  
ATOM    430  CB  CYS C  30      48.228  47.114  33.753  1.00  0.00           C  
ATOM    431  HB2 CYS C  30      47.621  47.964  34.043  1.00  0.00           H  
ATOM    432  HB3 CYS C  30      49.226  47.238  34.181  1.00  0.00           H  
ATOM    433  SG  CYS C  30      48.361  47.071  31.947  1.00  0.00           S  
ATOM    434  HG  CYS C  30      48.832  48.317  31.800  1.00  0.00           H  
ATOM    435  C   CYS C  30      47.656  45.884  35.863  1.00  0.00           C  
ATOM    436  O   CYS C  30      46.783  46.448  36.527  1.00  0.00           O  
ATOM    437  N   LEU C  31      48.730  45.321  36.406  1.00  0.00           N  
ATOM    438  H   LEU C  31      49.406  44.910  35.770  1.00  0.00           H  
ATOM    439  CA  LEU C  31      49.108  45.353  37.811  1.00  0.00           C  
ATOM    440  HA  LEU C  31      48.210  45.411  38.429  1.00  0.00           H  
ATOM    441  CB  LEU C  31      49.841  44.032  38.104  1.00  0.00           C  
ATOM    442  HB2 LEU C  31      49.151  43.209  37.907  1.00  0.00           H  
ATOM    443  HB3 LEU C  31      50.671  43.940  37.406  1.00  0.00           H  
ATOM    444  CG  LEU C  31      50.403  43.874  39.526  1.00  0.00           C  
ATOM    445  HG  LEU C  31      51.163  44.634  39.711  1.00  0.00           H  
ATOM    446  CD1 LEU C  31      49.313  43.993  40.587  1.00  0.00           C  
ATOM    447 1HD1 LEU C  31      48.429  43.442  40.273  1.00  0.00           H  
ATOM    448 2HD1 LEU C  31      49.670  43.583  41.528  1.00  0.00           H  
ATOM    449 3HD1 LEU C  31      49.053  45.039  40.736  1.00  0.00           H  
ATOM    450  CD2 LEU C  31      51.058  42.498  39.650  1.00  0.00           C  
ATOM    451 1HD2 LEU C  31      51.858  42.401  38.915  1.00  0.00           H  
ATOM    452 2HD2 LEU C  31      51.486  42.376  40.644  1.00  0.00           H  
ATOM    453 3HD2 LEU C  31      50.320  41.713  39.478  1.00  0.00           H  
ATOM    454  C   LEU C  31      49.987  46.580  38.088  1.00  0.00           C  
ATOM    455  O   LEU C  31      51.019  46.761  37.437  1.00  0.00           O  
ATOM    456  N   TYR C  32      49.603  47.384  39.080  1.00  0.00           N  
ATOM    457  H   TYR C  32      48.749  47.151  39.579  1.00  0.00           H  
ATOM    458  CA  TYR C  32      50.386  48.511  39.593  1.00  0.00           C  
ATOM    459  HA  TYR C  32      51.327  48.568  39.050  1.00  0.00           H  
ATOM    460  CB  TYR C  32      49.651  49.845  39.392  1.00  0.00           C  
ATOM    461  HB2 TYR C  32      48.662  49.775  39.845  1.00  0.00           H  
ATOM    462  HB3 TYR C  32      50.194  50.624  39.929  1.00  0.00           H  
ATOM    463  CG  TYR C  32      49.490  50.289  37.951  1.00  0.00           C  
ATOM    464  CD1 TYR C  32      48.513  49.679  37.146  1.00  0.00           C  
ATOM    465  HD1 TYR C  32      47.902  48.879  37.540  1.00  0.00           H  
ATOM    466  CE1 TYR C  32      48.309  50.127  35.833  1.00  0.00           C  
ATOM    467  HE1 TYR C  32      47.545  49.673  35.238  1.00  0.00           H  
ATOM    468  CZ  TYR C  32      49.074  51.185  35.307  1.00  0.00           C  
ATOM    469  OH  TYR C  32      48.842  51.616  34.040  1.00  0.00           O  
ATOM    470  HH  TYR C  32      48.116  51.142  33.622  1.00  0.00           H  
ATOM    471  CE2 TYR C  32      50.064  51.791  36.108  1.00  0.00           C  
ATOM    472  HE2 TYR C  32      50.641  52.611  35.703  1.00  0.00           H  
ATOM    473  CD2 TYR C  32      50.273  51.340  37.428  1.00  0.00           C  
ATOM    474  HD2 TYR C  32      51.025  51.812  38.043  1.00  0.00           H  
ATOM    475  C   TYR C  32      50.717  48.300  41.072  1.00  0.00           C  
ATOM    476  O   TYR C  32      49.921  47.731  41.823  1.00  0.00           O  
ATOM    477  N   GLN C  33      51.882  48.789  41.493  1.00  0.00           N  
ATOM    478  H   GLN C  33      52.474  49.257  40.811  1.00  0.00           H  
ATOM    479  CA  GLN C  33      52.406  48.667  42.853  1.00  0.00           C  
ATOM    480  HA  GLN C  33      51.619  48.267  43.487  1.00  0.00           H  
ATOM    481  CB  GLN C  33      53.558  47.642  42.841  1.00  0.00           C  
ATOM    482  HB2 GLN C  33      53.178  46.724  42.388  1.00  0.00           H  
ATOM    483  HB3 GLN C  33      54.371  48.019  42.219  1.00  0.00           H  
ATOM    484  CG  GLN C  33      54.106  47.305  44.239  1.00  0.00           C  
ATOM    485  HG2 GLN C  33      54.628  48.178  44.631  1.00  0.00           H  
ATOM    486  HG3 GLN C  33      53.273  47.084  44.906  1.00  0.00           H  
ATOM    487  CD  GLN C  33      55.062  46.106  44.265  1.00  0.00           C  
ATOM    488  OE1 GLN C  33      55.085  45.241  43.395  1.00  0.00           O  
ATOM    489  NE2 GLN C  33      55.873  45.986  45.294  1.00  0.00           N  
ATOM    490 1HE2 GLN C  33      56.493  45.184  45.340  1.00  0.00           H  
ATOM    491 2HE2 GLN C  33      55.883  46.675  46.024  1.00  0.00           H  
ATOM    492  C   GLN C  33      52.800  50.045  43.415  1.00  0.00           C  
ATOM    493  O   GLN C  33      53.307  50.903  42.689  1.00  0.00           O  
ATOM    494  N   HIS C  34      52.543  50.265  44.706  1.00  0.00           N  
ATOM    495  H   HIS C  34      52.070  49.531  45.223  1.00  0.00           H  
ATOM    496  CA  HIS C  34      52.903  51.483  45.439  1.00  0.00           C  
ATOM    497  HA  HIS C  34      52.716  52.344  44.795  1.00  0.00           H  
ATOM    498  CB  HIS C  34      52.015  51.623  46.685  1.00  0.00           C  
ATOM    499  HB2 HIS C  34      50.977  51.457  46.394  1.00  0.00           H  
ATOM    500  HB3 HIS C  34      52.285  50.851  47.406  1.00  0.00           H  
ATOM    501  CG  HIS C  34      52.100  52.971  47.364  1.00  0.00           C  
ATOM    502  ND1 HIS C  34      53.216  53.482  48.034  1.00  0.00           N  
ATOM    503  CE1 HIS C  34      52.838  54.686  48.504  1.00  0.00           C  
ATOM    504  HE1 HIS C  34      53.473  55.364  49.063  1.00  0.00           H  
ATOM    505  NE2 HIS C  34      51.562  54.949  48.174  1.00  0.00           N  
ATOM    506  HE2 HIS C  34      51.070  55.819  48.390  1.00  0.00           H  
ATOM    507  CD2 HIS C  34      51.083  53.879  47.448  1.00  0.00           C  
ATOM    508  HD2 HIS C  34      50.094  53.767  47.024  1.00  0.00           H  
ATOM    509  C   HIS C  34      54.390  51.459  45.804  1.00  0.00           C  
ATOM    510  O   HIS C  34      54.883  50.493  46.390  1.00  0.00           O  
ATOM    511  N   ARG C  35      55.105  52.530  45.459  1.00  0.00           N  
ATOM    512  H   ARG C  35      54.605  53.284  44.997  1.00  0.00           H  
ATOM    513  CA  ARG C  35      56.571  52.637  45.542  1.00  0.00           C  
ATOM    514  HA  ARG C  35      57.018  51.758  45.077  1.00  0.00           H  
ATOM    515  CB  ARG C  35      57.004  53.888  44.761  1.00  0.00           C  
ATOM    516  HB2 ARG C  35      56.374  54.733  45.047  1.00  0.00           H  
ATOM    517  HB3 ARG C  35      58.037  54.133  45.020  1.00  0.00           H  
ATOM    518  CG  ARG C  35      56.933  53.667  43.241  1.00  0.00           C  
ATOM    519  HG2 ARG C  35      57.696  52.936  42.967  1.00  0.00           H  
ATOM    520  HG3 ARG C  35      55.957  53.279  42.948  1.00  0.00           H  
ATOM    521  CD  ARG C  35      57.186  54.987  42.505  1.00  0.00           C  
ATOM    522  HD2 ARG C  35      56.237  55.508  42.365  1.00  0.00           H  
ATOM    523  HD3 ARG C  35      57.844  55.613  43.114  1.00  0.00           H  
ATOM    524  NE  ARG C  35      57.839  54.762  41.207  1.00  0.00           N  
ATOM    525  HE  ARG C  35      58.006  53.805  40.906  1.00  0.00           H  
ATOM    526  CZ  ARG C  35      58.399  55.678  40.450  1.00  0.00           C  
ATOM    527  NH1 ARG C  35      58.281  56.953  40.678  1.00  0.00           N  
ATOM    528 1HH1 ARG C  35      57.677  57.272  41.409  1.00  0.00           H  
ATOM    529 2HH1 ARG C  35      58.752  57.629  40.083  1.00  0.00           H  
ATOM    530  NH2 ARG C  35      59.107  55.291  39.441  1.00  0.00           N  
ATOM    531 1HH2 ARG C  35      59.148  54.290  39.254  1.00  0.00           H  
ATOM    532 2HH2 ARG C  35      59.571  55.955  38.851  1.00  0.00           H  
ATOM    533  C   ARG C  35      57.128  52.661  46.966  1.00  0.00           C  
ATOM    534  O   ARG C  35      58.285  52.298  47.152  1.00  0.00           O  
ATOM    535  N   GLU C  36      56.331  53.054  47.960  1.00  0.00           N  
ATOM    536  H   GLU C  36      55.382  53.316  47.728  1.00  0.00           H  
ATOM    537  CA  GLU C  36      56.769  53.128  49.365  1.00  0.00           C  
ATOM    538  HA  GLU C  36      57.844  52.955  49.426  1.00  0.00           H  
ATOM    539  CB  GLU C  36      56.496  54.524  49.943  1.00  0.00           C  
ATOM    540  HB2 GLU C  36      55.425  54.722  49.918  1.00  0.00           H  
ATOM    541  HB3 GLU C  36      56.820  54.528  50.985  1.00  0.00           H  
ATOM    542  CG  GLU C  36      57.237  55.644  49.199  1.00  0.00           C  
ATOM    543  HG2 GLU C  36      58.288  55.360  49.102  1.00  0.00           H  
ATOM    544  HG3 GLU C  36      56.818  55.757  48.198  1.00  0.00           H  
ATOM    545  CD  GLU C  36      57.144  56.982  49.942  1.00  0.00           C  
ATOM    546  OE1 GLU C  36      58.081  57.805  49.824  1.00  0.00           O  
ATOM    547  OE2 GLU C  36      56.157  57.241  50.666  1.00  0.00           O  
ATOM    548  C   GLU C  36      56.112  52.071  50.261  1.00  0.00           C  
ATOM    549  O   GLU C  36      56.766  51.555  51.170  1.00  0.00           O  
ATOM    550  N   LEU C  37      54.838  51.749  50.007  1.00  0.00           N  
ATOM    551  H   LEU C  37      54.375  52.232  49.245  1.00  0.00           H  
ATOM    552  CA  LEU C  37      54.009  50.877  50.852  1.00  0.00           C  
ATOM    553  HA  LEU C  37      54.490  50.767  51.823  1.00  0.00           H  
ATOM    554  CB  LEU C  37      52.634  51.545  51.069  1.00  0.00           C  
ATOM    555  HB2 LEU C  37      52.132  51.621  50.103  1.00  0.00           H  
ATOM    556  HB3 LEU C  37      52.032  50.895  51.703  1.00  0.00           H  
ATOM    557  CG  LEU C  37      52.666  52.943  51.716  1.00  0.00           C  
ATOM    558  HG  LEU C  37      53.242  53.627  51.094  1.00  0.00           H  
ATOM    559  CD1 LEU C  37      51.238  53.486  51.823  1.00  0.00           C  
ATOM    560 1HD1 LEU C  37      50.637  52.838  52.459  1.00  0.00           H  
ATOM    561 2HD1 LEU C  37      51.259  54.491  52.247  1.00  0.00           H  
ATOM    562 3HD1 LEU C  37      50.791  53.537  50.831  1.00  0.00           H  
ATOM    563  CD2 LEU C  37      53.278  52.927  53.118  1.00  0.00           C  
ATOM    564 1HD2 LEU C  37      54.328  52.641  53.060  1.00  0.00           H  
ATOM    565 2HD2 LEU C  37      53.222  53.923  53.555  1.00  0.00           H  
ATOM    566 3HD2 LEU C  37      52.743  52.222  53.755  1.00  0.00           H  
ATOM    567  C   LEU C  37      53.854  49.445  50.309  1.00  0.00           C  
ATOM    568  O   LEU C  37      53.184  48.631  50.939  1.00  0.00           O  
ATOM    569  N   ASP C  38      54.414  49.142  49.132  1.00  0.00           N  
ATOM    570  H   ASP C  38      54.924  49.878  48.661  1.00  0.00           H  
ATOM    571  CA  ASP C  38      54.348  47.844  48.435  1.00  0.00           C  
ATOM    572  HA  ASP C  38      54.825  48.018  47.470  1.00  0.00           H  
ATOM    573  CB  ASP C  38      55.203  46.772  49.142  1.00  0.00           C  
ATOM    574  HB2 ASP C  38      54.637  46.383  49.990  1.00  0.00           H  
ATOM    575  HB3 ASP C  38      55.365  45.944  48.449  1.00  0.00           H  
ATOM    576  CG  ASP C  38      56.566  47.257  49.645  1.00  0.00           C  
ATOM    577  OD1 ASP C  38      57.481  47.466  48.812  1.00  0.00           O  
ATOM    578  OD2 ASP C  38      56.766  47.341  50.880  1.00  0.00           O  
ATOM    579  C   ASP C  38      52.935  47.319  48.081  1.00  0.00           C  
ATOM    580  O   ASP C  38      52.806  46.237  47.506  1.00  0.00           O  
ATOM    581  N   LEU C  39      51.876  48.087  48.373  1.00  0.00           N  
ATOM    582  H   LEU C  39      52.065  48.931  48.888  1.00  0.00           H  
ATOM    583  CA  LEU C  39      50.477  47.756  48.066  1.00  0.00           C  
ATOM    584  HA  LEU C  39      50.233  46.814  48.557  1.00  0.00           H  
ATOM    585  CB  LEU C  39      49.540  48.865  48.588  1.00  0.00           C  
ATOM    586  HB2 LEU C  39      49.785  49.791  48.066  1.00  0.00           H  
ATOM    587  HB3 LEU C  39      48.514  48.602  48.323  1.00  0.00           H  
ATOM    588  CG  LEU C  39      49.597  49.130  50.104  1.00  0.00           C  
ATOM    589  HG  LEU C  39      50.613  49.397  50.385  1.00  0.00           H  
ATOM    590  CD1 LEU C  39      48.685  50.307  50.454  1.00  0.00           C  
ATOM    591 1HD1 LEU C  39      47.651  50.067  50.207  1.00  0.00           H  
ATOM    592 2HD1 LEU C  39      48.758  50.521  51.520  1.00  0.00           H  
ATOM    593 3HD1 LEU C  39      48.996  51.192  49.899  1.00  0.00           H  
ATOM    594  CD2 LEU C  39      49.154  47.918  50.925  1.00  0.00           C  
ATOM    595 1HD2 LEU C  39      49.847  47.093  50.770  1.00  0.00           H  
ATOM    596 2HD2 LEU C  39      49.164  48.172  51.985  1.00  0.00           H  
ATOM    597 3HD2 LEU C  39      48.147  47.614  50.638  1.00  0.00           H  
ATOM    598  C   LEU C  39      50.269  47.566  46.557  1.00  0.00           C  
ATOM    599  O   LEU C  39      50.880  48.273  45.759  1.00  0.00           O  
ATOM    600  N   LYS C  40      49.381  46.648  46.159  1.00  0.00           N  
ATOM    601  H   LYS C  40      48.873  46.140  46.868  1.00  0.00           H  
ATOM    602  CA  LYS C  40      49.142  46.275  44.753  1.00  0.00           C  
ATOM    603  HA  LYS C  40      49.702  46.947  44.104  1.00  0.00           H  
ATOM    604  CB  LYS C  40      49.646  44.846  44.498  1.00  0.00           C  
ATOM    605  HB2 LYS C  40      49.199  44.187  45.244  1.00  0.00           H  
ATOM    606  HB3 LYS C  40      49.312  44.517  43.515  1.00  0.00           H  
ATOM    607  CG  LYS C  40      51.181  44.749  44.560  1.00  0.00           C  
ATOM    608  HG2 LYS C  40      51.615  45.195  43.664  1.00  0.00           H  
ATOM    609  HG3 LYS C  40      51.534  45.305  45.425  1.00  0.00           H  
ATOM    610  CD  LYS C  40      51.654  43.298  44.702  1.00  0.00           C  
ATOM    611  HD2 LYS C  40      51.007  42.795  45.420  1.00  0.00           H  
ATOM    612  HD3 LYS C  40      51.589  42.780  43.744  1.00  0.00           H  
ATOM    613  CE  LYS C  40      53.092  43.268  45.239  1.00  0.00           C  
ATOM    614  HE2 LYS C  40      53.794  43.540  44.447  1.00  0.00           H  
ATOM    615  HE3 LYS C  40      53.172  44.018  46.034  1.00  0.00           H  
ATOM    616  NZ  LYS C  40      53.422  41.942  45.808  1.00  0.00           N  
ATOM    617  HZ1 LYS C  40      53.722  41.262  45.111  1.00  0.00           H  
ATOM    618  HZ2 LYS C  40      54.141  42.018  46.527  1.00  0.00           H  
ATOM    619  HZ3 LYS C  40      52.619  41.554  46.295  1.00  0.00           H  
ATOM    620  C   LYS C  40      47.670  46.414  44.370  1.00  0.00           C  
ATOM    621  O   LYS C  40      46.787  46.054  45.148  1.00  0.00           O  
ATOM    622  N   ILE C  41      47.421  46.904  43.158  1.00  0.00           N  
ATOM    623  H   ILE C  41      48.220  47.149  42.580  1.00  0.00           H  
ATOM    624  CA  ILE C  41      46.088  47.105  42.570  1.00  0.00           C  
ATOM    625  HA  ILE C  41      45.373  46.466  43.089  1.00  0.00           H  
ATOM    626  CB  ILE C  41      45.609  48.570  42.730  1.00  0.00           C  
ATOM    627  HB  ILE C  41      44.624  48.647  42.265  1.00  0.00           H  
ATOM    628  CG2 ILE C  41      45.435  48.925  44.218  1.00  0.00           C  
ATOM    629 1HG2 ILE C  41      46.408  49.016  44.701  1.00  0.00           H  
ATOM    630 2HG2 ILE C  41      44.899  49.867  44.322  1.00  0.00           H  
ATOM    631 3HG2 ILE C  41      44.861  48.146  44.721  1.00  0.00           H  
ATOM    632  CG1 ILE C  41      46.549  49.560  42.001  1.00  0.00           C  
ATOM    633 2HG1 ILE C  41      47.559  49.480  42.401  1.00  0.00           H  
ATOM    634 3HG1 ILE C  41      46.583  49.303  40.943  1.00  0.00           H  
ATOM    635  CD1 ILE C  41      46.105  51.021  42.093  1.00  0.00           C  
ATOM    636 1HD1 ILE C  41      46.173  51.381  43.118  1.00  0.00           H  
ATOM    637 2HD1 ILE C  41      46.759  51.632  41.470  1.00  0.00           H  
ATOM    638 3HD1 ILE C  41      45.078  51.110  41.738  1.00  0.00           H  
ATOM    639  C   ILE C  41      46.072  46.686  41.097  1.00  0.00           C  
ATOM    640  O   ILE C  41      47.103  46.723  40.422  1.00  0.00           O  
ATOM    641  N   ALA C  42      44.897  46.329  40.587  1.00  0.00           N  
ATOM    642  H   ALA C  42      44.074  46.384  41.180  1.00  0.00           H  
ATOM    643  CA  ALA C  42      44.671  46.063  39.169  1.00  0.00           C  
ATOM    644  HA  ALA C  42      45.629  45.979  38.659  1.00  0.00           H  
ATOM    645  CB  ALA C  42      43.955  44.716  39.030  1.00  0.00           C  
ATOM    646  HB1 ALA C  42      42.998  44.751  39.551  1.00  0.00           H  
ATOM    647  HB2 ALA C  42      43.785  44.495  37.976  1.00  0.00           H  
ATOM    648  HB3 ALA C  42      44.568  43.926  39.464  1.00  0.00           H  
ATOM    649  C   ALA C  42      43.892  47.223  38.529  1.00  0.00           C  
ATOM    650  O   ALA C  42      42.943  47.738  39.120  1.00  0.00           O  
ATOM    651  N   ILE C  43      44.269  47.639  37.318  1.00  0.00           N  
ATOM    652  H   ILE C  43      45.081  47.198  36.893  1.00  0.00           H  
ATOM    653  CA  ILE C  43      43.612  48.730  36.580  1.00  0.00           C  
ATOM    654  HA  ILE C  43      42.659  48.952  37.054  1.00  0.00           H  
ATOM    655  CB  ILE C  43      44.462  50.029  36.610  1.00  0.00           C  
ATOM    656  HB  ILE C  43      45.332  49.876  35.977  1.00  0.00           H  
ATOM    657  CG2 ILE C  43      43.638  51.195  36.029  1.00  0.00           C  
ATOM    658 1HG2 ILE C  43      42.792  51.416  36.680  1.00  0.00           H  
ATOM    659 2HG2 ILE C  43      44.261  52.082  35.928  1.00  0.00           H  
ATOM    660 3HG2 ILE C  43      43.267  50.942  35.038  1.00  0.00           H  
ATOM    661  CG1 ILE C  43      44.999  50.379  38.020  1.00  0.00           C  
ATOM    662 2HG1 ILE C  43      44.171  50.424  38.726  1.00  0.00           H  
ATOM    663 3HG1 ILE C  43      45.673  49.588  38.348  1.00  0.00           H  
ATOM    664  CD1 ILE C  43      45.786  51.697  38.095  1.00  0.00           C  
ATOM    665 1HD1 ILE C  43      45.110  52.548  38.019  1.00  0.00           H  
ATOM    666 2HD1 ILE C  43      46.310  51.750  39.049  1.00  0.00           H  
ATOM    667 3HD1 ILE C  43      46.518  51.747  37.290  1.00  0.00           H  
ATOM    668  C   ILE C  43      43.311  48.267  35.149  1.00  0.00           C  
ATOM    669  O   ILE C  43      44.176  47.687  34.489  1.00  0.00           O  
ATOM    670  N   LYS C  44      42.098  48.524  34.645  1.00  0.00           N  
ATOM    671  H   LYS C  44      41.442  49.036  35.232  1.00  0.00           H  
ATOM    672  CA  LYS C  44      41.667  48.148  33.283  1.00  0.00           C  
ATOM    673  HA  LYS C  44      41.777  47.067  33.177  1.00  0.00           H  
ATOM    674  CB  LYS C  44      40.174  48.501  33.115  1.00  0.00           C  
ATOM    675  HB2 LYS C  44      39.680  48.438  34.085  1.00  0.00           H  
ATOM    676  HB3 LYS C  44      40.101  49.540  32.795  1.00  0.00           H  
ATOM    677  CG  LYS C  44      39.380  47.621  32.125  1.00  0.00           C  
ATOM    678  HG2 LYS C  44      38.559  48.225  31.737  1.00  0.00           H  
ATOM    679  HG3 LYS C  44      40.014  47.339  31.284  1.00  0.00           H  
ATOM    680  CD  LYS C  44      38.765  46.361  32.773  1.00  0.00           C  
ATOM    681  HD2 LYS C  44      39.527  45.841  33.354  1.00  0.00           H  
ATOM    682  HD3 LYS C  44      37.952  46.658  33.437  1.00  0.00           H  
ATOM    683  CE  LYS C  44      38.205  45.418  31.694  1.00  0.00           C  
ATOM    684  HE2 LYS C  44      37.900  46.012  30.830  1.00  0.00           H  
ATOM    685  HE3 LYS C  44      39.008  44.748  31.374  1.00  0.00           H  
ATOM    686  NZ  LYS C  44      37.045  44.617  32.168  1.00  0.00           N  
ATOM    687  HZ1 LYS C  44      36.221  45.201  32.358  1.00  0.00           H  
ATOM    688  HZ2 LYS C  44      36.792  43.917  31.471  1.00  0.00           H  
ATOM    689  HZ3 LYS C  44      37.271  44.111  33.011  1.00  0.00           H  
ATOM    690  C   LYS C  44      42.567  48.809  32.217  1.00  0.00           C  
ATOM    691  O   LYS C  44      42.970  49.967  32.363  1.00  0.00           O  
ATOM    692  N   SER C  45      42.932  48.065  31.177  1.00  0.00           N  
ATOM    693  H   SER C  45      42.652  47.090  31.181  1.00  0.00           H  
ATOM    694  CA  SER C  45      43.894  48.472  30.131  1.00  0.00           C  
ATOM    695  HA  SER C  45      43.867  49.556  30.028  1.00  0.00           H  
ATOM    696  CB  SER C  45      45.323  48.076  30.526  1.00  0.00           C  
ATOM    697  HB2 SER C  45      46.010  48.249  29.696  1.00  0.00           H  
ATOM    698  HB3 SER C  45      45.646  48.704  31.347  1.00  0.00           H  
ATOM    699  OG  SER C  45      45.389  46.722  30.926  1.00  0.00           O  
ATOM    700  HG  SER C  45      46.312  46.530  31.139  1.00  0.00           H  
ATOM    701  C   SER C  45      43.582  47.909  28.740  1.00  0.00           C  
ATOM    702  O   SER C  45      44.421  47.981  27.841  1.00  0.00           O  
ATOM    703  N   CYS C  46      42.386  47.354  28.534  1.00  0.00           N  
ATOM    704  H   CYS C  46      41.708  47.345  29.281  1.00  0.00           H  
ATOM    705  CA  CYS C  46      41.986  46.828  27.235  1.00  0.00           C  
ATOM    706  HA  CYS C  46      42.753  46.113  26.931  1.00  0.00           H  
ATOM    707  CB  CYS C  46      40.662  46.059  27.369  1.00  0.00           C  
ATOM    708  HB2 CYS C  46      40.390  45.624  26.407  1.00  0.00           H  
ATOM    709  HB3 CYS C  46      40.791  45.252  28.087  1.00  0.00           H  
ATOM    710  SG  CYS C  46      39.314  47.128  27.946  1.00  0.00           S  
ATOM    711  HG  CYS C  46      38.412  46.151  28.104  1.00  0.00           H  
ATOM    712  C   CYS C  46      41.936  47.915  26.143  1.00  0.00           C  
ATOM    713  O   CYS C  46      41.757  49.107  26.404  1.00  0.00           O  
ATOM    714  N   ARG C  47      42.083  47.484  24.885  1.00  0.00           N  
ATOM    715  H   ARG C  47      42.226  46.496  24.749  1.00  0.00           H  
ATOM    716  CA  ARG C  47      42.035  48.351  23.699  1.00  0.00           C  
ATOM    717  HA  ARG C  47      42.805  49.116  23.805  1.00  0.00           H  
ATOM    718  CB  ARG C  47      42.340  47.481  22.468  1.00  0.00           C  
ATOM    719  HB2 ARG C  47      43.244  46.901  22.673  1.00  0.00           H  
ATOM    720  HB3 ARG C  47      41.516  46.778  22.328  1.00  0.00           H  
ATOM    721  CG  ARG C  47      42.563  48.253  21.157  1.00  0.00           C  
ATOM    722  HG2 ARG C  47      41.702  48.883  20.935  1.00  0.00           H  
ATOM    723  HG3 ARG C  47      43.456  48.873  21.247  1.00  0.00           H  
ATOM    724  CD  ARG C  47      42.748  47.223  20.034  1.00  0.00           C  
ATOM    725  HD2 ARG C  47      43.526  46.515  20.331  1.00  0.00           H  
ATOM    726  HD3 ARG C  47      41.810  46.676  19.915  1.00  0.00           H  
ATOM    727  NE  ARG C  47      43.130  47.823  18.743  1.00  0.00           N  
ATOM    728  HE  ARG C  47      43.386  48.800  18.717  1.00  0.00           H  
ATOM    729  CZ  ARG C  47      43.197  47.172  17.595  1.00  0.00           C  
ATOM    730  NH1 ARG C  47      42.879  45.913  17.486  1.00  0.00           N  
ATOM    731 1HH1 ARG C  47      42.719  45.358  18.318  1.00  0.00           H  
ATOM    732 2HH1 ARG C  47      43.000  45.408  16.618  1.00  0.00           H  
ATOM    733  NH2 ARG C  47      43.601  47.781  16.522  1.00  0.00           N  
ATOM    734 1HH2 ARG C  47      43.939  48.740  16.604  1.00  0.00           H  
ATOM    735 2HH2 ARG C  47      43.713  47.275  15.666  1.00  0.00           H  
ATOM    736  C   ARG C  47      40.667  49.033  23.587  1.00  0.00           C  
ATOM    737  O   ARG C  47      39.645  48.354  23.619  1.00  0.00           O  
ATOM    738  N   LEU C  48      40.659  50.353  23.402  1.00  0.00           N  
ATOM    739  H   LEU C  48      41.530  50.840  23.524  1.00  0.00           H  
ATOM    740  CA  LEU C  48      39.444  51.157  23.173  1.00  0.00           C  
ATOM    741  HA  LEU C  48      38.560  50.533  23.304  1.00  0.00           H  
ATOM    742  CB  LEU C  48      39.392  52.286  24.219  1.00  0.00           C  
ATOM    743  HB2 LEU C  48      40.321  52.854  24.163  1.00  0.00           H  
ATOM    744  HB3 LEU C  48      38.575  52.965  23.972  1.00  0.00           H  
ATOM    745  CG  LEU C  48      39.196  51.781  25.663  1.00  0.00           C  
ATOM    746  HG  LEU C  48      39.934  51.013  25.891  1.00  0.00           H  
ATOM    747  CD1 LEU C  48      39.392  52.927  26.650  1.00  0.00           C  
ATOM    748 1HD1 LEU C  48      38.659  53.711  26.473  1.00  0.00           H  
ATOM    749 2HD1 LEU C  48      39.288  52.545  27.663  1.00  0.00           H  
ATOM    750 3HD1 LEU C  48      40.400  53.330  26.541  1.00  0.00           H  
ATOM    751  CD2 LEU C  48      37.796  51.204  25.879  1.00  0.00           C  
ATOM    752 1HD2 LEU C  48      37.658  50.314  25.268  1.00  0.00           H  
ATOM    753 2HD2 LEU C  48      37.676  50.917  26.923  1.00  0.00           H  
ATOM    754 3HD2 LEU C  48      37.045  51.948  25.625  1.00  0.00           H  
ATOM    755  C   LEU C  48      39.354  51.694  21.735  1.00  0.00           C  
ATOM    756  O   LEU C  48      38.258  51.891  21.214  1.00  0.00           O  
ATOM    757  N   GLU C  49      40.494  51.862  21.060  1.00  0.00           N  
ATOM    758  H   GLU C  49      41.356  51.645  21.526  1.00  0.00           H  
ATOM    759  CA  GLU C  49      40.559  52.263  19.652  1.00  0.00           C  
ATOM    760  HA  GLU C  49      40.051  53.223  19.547  1.00  0.00           H  
ATOM    761  CB  GLU C  49      42.033  52.454  19.267  1.00  0.00           C  
ATOM    762  HB2 GLU C  49      42.487  53.132  19.992  1.00  0.00           H  
ATOM    763  HB3 GLU C  49      42.559  51.499  19.318  1.00  0.00           H  
ATOM    764  CG  GLU C  49      42.197  53.055  17.868  1.00  0.00           C  
ATOM    765  HG2 GLU C  49      42.012  52.288  17.115  1.00  0.00           H  
ATOM    766  HG3 GLU C  49      41.468  53.856  17.730  1.00  0.00           H  
ATOM    767  CD  GLU C  49      43.608  53.620  17.708  1.00  0.00           C  
ATOM    768  OE1 GLU C  49      43.773  54.858  17.850  1.00  0.00           O  
ATOM    769  OE2 GLU C  49      44.557  52.834  17.482  1.00  0.00           O  
ATOM    770  C   GLU C  49      39.850  51.235  18.754  1.00  0.00           C  
ATOM    771  O   GLU C  49      40.145  50.041  18.836  1.00  0.00           O  
ATOM    772  N   LEU C  50      38.873  51.699  17.958  1.00  0.00           N  
ATOM    773  H   LEU C  50      38.702  52.694  17.974  1.00  0.00           H  
ATOM    774  CA  LEU C  50      37.934  50.895  17.148  1.00  0.00           C  
ATOM    775  HA  LEU C  50      37.051  51.529  17.048  1.00  0.00           H  
ATOM    776  CB  LEU C  50      38.434  50.718  15.695  1.00  0.00           C  
ATOM    777  HB2 LEU C  50      37.722  50.096  15.150  1.00  0.00           H  
ATOM    778  HB3 LEU C  50      38.390  51.707  15.236  1.00  0.00           H  
ATOM    779  CG  LEU C  50      39.855  50.168  15.463  1.00  0.00           C  
ATOM    780  HG  LEU C  50      40.573  50.725  16.061  1.00  0.00           H  
ATOM    781  CD1 LEU C  50      39.987  48.682  15.779  1.00  0.00           C  
ATOM    782 1HD1 LEU C  50      39.299  48.130  15.143  1.00  0.00           H  
ATOM    783 2HD1 LEU C  50      41.005  48.356  15.583  1.00  0.00           H  
ATOM    784 3HD1 LEU C  50      39.749  48.494  16.824  1.00  0.00           H  
ATOM    785  CD2 LEU C  50      40.226  50.350  13.989  1.00  0.00           C  
ATOM    786 1HD2 LEU C  50      40.191  51.408  13.729  1.00  0.00           H  
ATOM    787 2HD2 LEU C  50      41.234  49.978  13.810  1.00  0.00           H  
ATOM    788 3HD2 LEU C  50      39.523  49.807  13.355  1.00  0.00           H  
ATOM    789  C   LEU C  50      37.356  49.643  17.849  1.00  0.00           C  
ATOM    790  O   LEU C  50      37.028  48.640  17.213  1.00  0.00           O  
ATOM    791  N   SER C  51      37.219  49.728  19.178  1.00  0.00           N  
ATOM    792  H   SER C  51      37.523  50.591  19.615  1.00  0.00           H  
ATOM    793  CA  SER C  51      36.821  48.643  20.084  1.00  0.00           C  
ATOM    794  HA  SER C  51      36.536  47.768  19.500  1.00  0.00           H  
ATOM    795  CB  SER C  51      38.009  48.241  20.966  1.00  0.00           C  
ATOM    796  HB2 SER C  51      38.279  49.081  21.602  1.00  0.00           H  
ATOM    797  HB3 SER C  51      37.715  47.403  21.599  1.00  0.00           H  
ATOM    798  OG  SER C  51      39.138  47.862  20.194  1.00  0.00           O  
ATOM    799  HG  SER C  51      39.417  48.625  19.654  1.00  0.00           H  
ATOM    800  C   SER C  51      35.599  49.060  20.915  1.00  0.00           C  
ATOM    801  O   SER C  51      35.635  49.113  22.147  1.00  0.00           O  
ATOM    802  N   THR C  52      34.498  49.391  20.234  1.00  0.00           N  
ATOM    803  H   THR C  52      34.501  49.273  19.230  1.00  0.00           H  
ATOM    804  CA  THR C  52      33.257  49.930  20.834  1.00  0.00           C  
ATOM    805  HA  THR C  52      33.468  50.904  21.274  1.00  0.00           H  
ATOM    806  CB  THR C  52      32.165  50.109  19.767  1.00  0.00           C  
ATOM    807  HB  THR C  52      31.210  50.320  20.251  1.00  0.00           H  
ATOM    808  CG2 THR C  52      32.493  51.251  18.806  1.00  0.00           C  
ATOM    809 1HG2 THR C  52      33.414  51.041  18.260  1.00  0.00           H  
ATOM    810 2HG2 THR C  52      31.676  51.374  18.093  1.00  0.00           H  
ATOM    811 3HG2 THR C  52      32.604  52.179  19.365  1.00  0.00           H  
ATOM    812  OG1 THR C  52      32.065  48.925  19.009  1.00  0.00           O  
ATOM    813  HG1 THR C  52      31.319  49.022  18.404  1.00  0.00           H  
ATOM    814  C   THR C  52      32.694  49.049  21.949  1.00  0.00           C  
ATOM    815  O   THR C  52      32.272  49.570  22.980  1.00  0.00           O  
ATOM    816  N   LYS C  53      32.758  47.718  21.809  1.00  0.00           N  
ATOM    817  H   LYS C  53      33.053  47.361  20.909  1.00  0.00           H  
ATOM    818  CA  LYS C  53      32.264  46.785  22.831  1.00  0.00           C  
ATOM    819  HA  LYS C  53      31.277  47.143  23.119  1.00  0.00           H  
ATOM    820  CB  LYS C  53      32.139  45.371  22.224  1.00  0.00           C  
ATOM    821  HB2 LYS C  53      31.887  45.454  21.165  1.00  0.00           H  
ATOM    822  HB3 LYS C  53      33.102  44.864  22.293  1.00  0.00           H  
ATOM    823  CG  LYS C  53      31.059  44.497  22.890  1.00  0.00           C  
ATOM    824  HG2 LYS C  53      31.089  43.509  22.427  1.00  0.00           H  
ATOM    825  HG3 LYS C  53      31.273  44.388  23.953  1.00  0.00           H  
ATOM    826  CD  LYS C  53      29.652  45.090  22.701  1.00  0.00           C  
ATOM    827  HD2 LYS C  53      29.558  45.993  23.304  1.00  0.00           H  
ATOM    828  HD3 LYS C  53      29.510  45.354  21.650  1.00  0.00           H  
ATOM    829  CE  LYS C  53      28.540  44.129  23.123  1.00  0.00           C  
ATOM    830  HE2 LYS C  53      28.586  43.232  22.499  1.00  0.00           H  
ATOM    831  HE3 LYS C  53      28.698  43.847  24.167  1.00  0.00           H  
ATOM    832  NZ  LYS C  53      27.227  44.796  22.971  1.00  0.00           N  
ATOM    833  HZ1 LYS C  53      27.076  45.068  22.000  1.00  0.00           H  
ATOM    834  HZ2 LYS C  53      26.460  44.224  23.281  1.00  0.00           H  
ATOM    835  HZ3 LYS C  53      27.220  45.663  23.519  1.00  0.00           H  
ATOM    836  C   LYS C  53      33.092  46.807  24.122  1.00  0.00           C  
ATOM    837  O   LYS C  53      32.525  46.708  25.206  1.00  0.00           O  
ATOM    838  N   ASN C  54      34.405  47.044  24.027  1.00  0.00           N  
ATOM    839  H   ASN C  54      34.805  47.153  23.109  1.00  0.00           H  
ATOM    840  CA  ASN C  54      35.263  47.252  25.198  1.00  0.00           C  
ATOM    841  HA  ASN C  54      35.081  46.447  25.915  1.00  0.00           H  
ATOM    842  CB  ASN C  54      36.748  47.207  24.791  1.00  0.00           C  
ATOM    843  HB2 ASN C  54      36.943  47.956  24.027  1.00  0.00           H  
ATOM    844  HB3 ASN C  54      37.358  47.463  25.656  1.00  0.00           H  
ATOM    845  CG  ASN C  54      37.231  45.857  24.283  1.00  0.00           C  
ATOM    846  OD1 ASN C  54      36.571  44.836  24.373  1.00  0.00           O  
ATOM    847  ND2 ASN C  54      38.424  45.814  23.744  1.00  0.00           N  
ATOM    848 1HD2 ASN C  54      38.732  44.936  23.373  1.00  0.00           H  
ATOM    849 2HD2 ASN C  54      38.954  46.677  23.652  1.00  0.00           H  
ATOM    850  C   ASN C  54      34.918  48.574  25.906  1.00  0.00           C  
ATOM    851  O   ASN C  54      34.820  48.586  27.132  1.00  0.00           O  
ATOM    852  N   ARG C  55      34.654  49.663  25.158  1.00  0.00           N  
ATOM    853  H   ARG C  55      34.764  49.581  24.153  1.00  0.00           H  
ATOM    854  CA  ARG C  55      34.143  50.930  25.726  1.00  0.00           C  
ATOM    855  HA  ARG C  55      34.841  51.280  26.489  1.00  0.00           H  
ATOM    856  CB  ARG C  55      34.026  52.013  24.629  1.00  0.00           C  
ATOM    857  HB2 ARG C  55      35.024  52.268  24.269  1.00  0.00           H  
ATOM    858  HB3 ARG C  55      33.463  51.609  23.790  1.00  0.00           H  
ATOM    859  CG  ARG C  55      33.313  53.295  25.114  1.00  0.00           C  
ATOM    860  HG2 ARG C  55      32.351  53.032  25.552  1.00  0.00           H  
ATOM    861  HG3 ARG C  55      33.912  53.782  25.885  1.00  0.00           H  
ATOM    862  CD  ARG C  55      33.001  54.281  23.980  1.00  0.00           C  
ATOM    863  HD2 ARG C  55      32.667  53.729  23.098  1.00  0.00           H  
ATOM    864  HD3 ARG C  55      32.175  54.922  24.294  1.00  0.00           H  
ATOM    865  NE  ARG C  55      34.160  55.118  23.633  1.00  0.00           N  
ATOM    866  HE  ARG C  55      34.782  54.785  22.916  1.00  0.00           H  
ATOM    867  CZ  ARG C  55      34.481  56.276  24.182  1.00  0.00           C  
ATOM    868  NH1 ARG C  55      33.783  56.885  25.095  1.00  0.00           N  
ATOM    869 1HH1 ARG C  55      32.849  56.598  25.355  1.00  0.00           H  
ATOM    870 2HH1 ARG C  55      34.139  57.789  25.408  1.00  0.00           H  
ATOM    871  NH2 ARG C  55      35.561  56.881  23.817  1.00  0.00           N  
ATOM    872 1HH2 ARG C  55      36.156  56.585  23.061  1.00  0.00           H  
ATOM    873 2HH2 ARG C  55      35.790  57.781  24.251  1.00  0.00           H  
ATOM    874  C   ARG C  55      32.811  50.716  26.449  1.00  0.00           C  
ATOM    875  O   ARG C  55      32.661  51.163  27.582  1.00  0.00           O  
ATOM    876  N   GLU C  56      31.858  50.040  25.809  1.00  0.00           N  
ATOM    877  H   GLU C  56      32.042  49.741  24.857  1.00  0.00           H  
ATOM    878  CA  GLU C  56      30.531  49.769  26.378  1.00  0.00           C  
ATOM    879  HA  GLU C  56      30.059  50.721  26.623  1.00  0.00           H  
ATOM    880  CB  GLU C  56      29.663  49.061  25.318  1.00  0.00           C  
ATOM    881  HB2 GLU C  56      29.726  49.627  24.387  1.00  0.00           H  
ATOM    882  HB3 GLU C  56      30.063  48.062  25.134  1.00  0.00           H  
ATOM    883  CG  GLU C  56      28.179  48.953  25.704  1.00  0.00           C  
ATOM    884  HG2 GLU C  56      28.091  48.369  26.622  1.00  0.00           H  
ATOM    885  HG3 GLU C  56      27.794  49.956  25.905  1.00  0.00           H  
ATOM    886  CD  GLU C  56      27.347  48.287  24.592  1.00  0.00           C  
ATOM    887  OE1 GLU C  56      27.442  47.048  24.439  1.00  0.00           O  
ATOM    888  OE2 GLU C  56      26.606  48.991  23.862  1.00  0.00           O  
ATOM    889  C   GLU C  56      30.650  48.976  27.692  1.00  0.00           C  
ATOM    890  O   GLU C  56      30.091  49.385  28.710  1.00  0.00           O  
ATOM    891  N   ARG C  57      31.476  47.917  27.713  1.00  0.00           N  
ATOM    892  H   ARG C  57      31.903  47.633  26.835  1.00  0.00           H  
ATOM    893  CA  ARG C  57      31.730  47.099  28.910  1.00  0.00           C  
ATOM    894  HA  ARG C  57      30.759  46.809  29.317  1.00  0.00           H  
ATOM    895  CB  ARG C  57      32.481  45.818  28.482  1.00  0.00           C  
ATOM    896  HB2 ARG C  57      32.013  45.426  27.578  1.00  0.00           H  
ATOM    897  HB3 ARG C  57      33.525  46.050  28.261  1.00  0.00           H  
ATOM    898  CG  ARG C  57      32.401  44.730  29.561  1.00  0.00           C  
ATOM    899  HG2 ARG C  57      32.988  45.043  30.427  1.00  0.00           H  
ATOM    900  HG3 ARG C  57      31.358  44.635  29.849  1.00  0.00           H  
ATOM    901  CD  ARG C  57      32.879  43.347  29.098  1.00  0.00           C  
ATOM    902  HD2 ARG C  57      32.314  43.062  28.210  1.00  0.00           H  
ATOM    903  HD3 ARG C  57      33.933  43.413  28.825  1.00  0.00           H  
ATOM    904  NE  ARG C  57      32.717  42.330  30.162  1.00  0.00           N  
ATOM    905  HE  ARG C  57      33.156  42.513  31.064  1.00  0.00           H  
ATOM    906  CZ  ARG C  57      32.196  41.116  30.082  1.00  0.00           C  
ATOM    907  NH1 ARG C  57      31.680  40.599  29.008  1.00  0.00           N  
ATOM    908 1HH1 ARG C  57      31.576  41.159  28.165  1.00  0.00           H  
ATOM    909 2HH1 ARG C  57      31.300  39.675  29.055  1.00  0.00           H  
ATOM    910  NH2 ARG C  57      32.180  40.374  31.143  1.00  0.00           N  
ATOM    911 1HH2 ARG C  57      32.595  40.778  31.977  1.00  0.00           H  
ATOM    912 2HH2 ARG C  57      32.001  39.370  31.108  1.00  0.00           H  
ATOM    913  C   ARG C  57      32.436  47.882  30.029  1.00  0.00           C  
ATOM    914  O   ARG C  57      32.068  47.733  31.192  1.00  0.00           O  
ATOM    915  N   TRP C  58      33.388  48.759  29.694  1.00  0.00           N  
ATOM    916  H   TRP C  58      33.650  48.814  28.716  1.00  0.00           H  
ATOM    917  CA  TRP C  58      34.097  49.633  30.645  1.00  0.00           C  
ATOM    918  HA  TRP C  58      34.520  49.021  31.443  1.00  0.00           H  
ATOM    919  CB  TRP C  58      35.255  50.324  29.899  1.00  0.00           C  
ATOM    920  HB2 TRP C  58      35.776  49.559  29.324  1.00  0.00           H  
ATOM    921  HB3 TRP C  58      34.841  51.032  29.181  1.00  0.00           H  
ATOM    922  CG  TRP C  58      36.311  51.043  30.692  1.00  0.00           C  
ATOM    923  CD1 TRP C  58      36.113  51.960  31.669  1.00  0.00           C  
ATOM    924  HD1 TRP C  58      35.148  52.290  32.034  1.00  0.00           H  
ATOM    925  NE1 TRP C  58      37.327  52.460  32.095  1.00  0.00           N  
ATOM    926  HE1 TRP C  58      37.409  53.248  32.739  1.00  0.00           H  
ATOM    927  CE2 TRP C  58      38.380  51.896  31.411  1.00  0.00           C  
ATOM    928  CZ2 TRP C  58      39.768  52.104  31.445  1.00  0.00           C  
ATOM    929  HZ2 TRP C  58      40.190  52.824  32.129  1.00  0.00           H  
ATOM    930  CH2 TRP C  58      40.589  51.391  30.555  1.00  0.00           C  
ATOM    931  HH2 TRP C  58      41.659  51.550  30.551  1.00  0.00           H  
ATOM    932  CZ3 TRP C  58      40.014  50.480  29.650  1.00  0.00           C  
ATOM    933  HZ3 TRP C  58      40.642  49.948  28.947  1.00  0.00           H  
ATOM    934  CE3 TRP C  58      38.619  50.281  29.629  1.00  0.00           C  
ATOM    935  HE3 TRP C  58      38.191  49.596  28.914  1.00  0.00           H  
ATOM    936  CD2 TRP C  58      37.762  50.983  30.505  1.00  0.00           C  
ATOM    937  C   TRP C  58      33.152  50.652  31.303  1.00  0.00           C  
ATOM    938  O   TRP C  58      33.122  50.767  32.530  1.00  0.00           O  
ATOM    939  N   CYS C  59      32.340  51.361  30.510  1.00  0.00           N  
ATOM    940  H   CYS C  59      32.419  51.243  29.504  1.00  0.00           H  
ATOM    941  CA  CYS C  59      31.370  52.341  31.015  1.00  0.00           C  
ATOM    942  HA  CYS C  59      31.871  52.983  31.740  1.00  0.00           H  
ATOM    943  CB  CYS C  59      30.894  53.226  29.855  1.00  0.00           C  
ATOM    944  HB2 CYS C  59      30.537  52.602  29.033  1.00  0.00           H  
ATOM    945  HB3 CYS C  59      30.074  53.857  30.206  1.00  0.00           H  
ATOM    946  SG  CYS C  59      32.259  54.291  29.296  1.00  0.00           S  
ATOM    947  HG  CYS C  59      31.526  55.117  28.539  1.00  0.00           H  
ATOM    948  C   CYS C  59      30.183  51.698  31.758  1.00  0.00           C  
ATOM    949  O   CYS C  59      29.523  52.364  32.558  1.00  0.00           O  
ATOM    950  N   HIS C  60      29.927  50.406  31.538  1.00  0.00           N  
ATOM    951  H   HIS C  60      30.425  49.942  30.787  1.00  0.00           H  
ATOM    952  CA  HIS C  60      28.956  49.624  32.301  1.00  0.00           C  
ATOM    953  HA  HIS C  60      28.083  50.245  32.515  1.00  0.00           H  
ATOM    954  CB  HIS C  60      28.492  48.452  31.429  1.00  0.00           C  
ATOM    955  HB2 HIS C  60      28.179  48.834  30.457  1.00  0.00           H  
ATOM    956  HB3 HIS C  60      29.317  47.756  31.269  1.00  0.00           H  
ATOM    957  CG  HIS C  60      27.332  47.709  32.021  1.00  0.00           C  
ATOM    958  ND1 HIS C  60      25.995  47.888  31.659  1.00  0.00           N  
ATOM    959  CE1 HIS C  60      25.293  47.036  32.424  1.00  0.00           C  
ATOM    960  HE1 HIS C  60      24.218  46.905  32.389  1.00  0.00           H  
ATOM    961  NE2 HIS C  60      26.122  46.341  33.214  1.00  0.00           N  
ATOM    962  HE2 HIS C  60      25.833  45.590  33.838  1.00  0.00           H  
ATOM    963  CD2 HIS C  60      27.411  46.746  32.979  1.00  0.00           C  
ATOM    964  HD2 HIS C  60      28.309  46.367  33.451  1.00  0.00           H  
ATOM    965  C   HIS C  60      29.518  49.163  33.654  1.00  0.00           C  
ATOM    966  O   HIS C  60      28.893  49.386  34.692  1.00  0.00           O  
ATOM    967  N   GLU C  61      30.720  48.574  33.669  1.00  0.00           N  
ATOM    968  H   GLU C  61      31.199  48.435  32.783  1.00  0.00           H  
ATOM    969  CA  GLU C  61      31.334  47.989  34.872  1.00  0.00           C  
ATOM    970  HA  GLU C  61      30.653  47.227  35.257  1.00  0.00           H  
ATOM    971  CB  GLU C  61      32.650  47.284  34.477  1.00  0.00           C  
ATOM    972  HB2 GLU C  61      32.400  46.398  33.893  1.00  0.00           H  
ATOM    973  HB3 GLU C  61      33.253  47.951  33.858  1.00  0.00           H  
ATOM    974  CG  GLU C  61      33.475  46.841  35.696  1.00  0.00           C  
ATOM    975  HG2 GLU C  61      34.115  47.670  36.005  1.00  0.00           H  
ATOM    976  HG3 GLU C  61      32.783  46.640  36.517  1.00  0.00           H  
ATOM    977  CD  GLU C  61      34.342  45.584  35.478  1.00  0.00           C  
ATOM    978  OE1 GLU C  61      35.007  45.427  34.424  1.00  0.00           O  
ATOM    979  OE2 GLU C  61      34.384  44.761  36.424  1.00  0.00           O  
ATOM    980  C   GLU C  61      31.517  49.019  36.005  1.00  0.00           C  
ATOM    981  O   GLU C  61      31.238  48.707  37.164  1.00  0.00           O  
ATOM    982  N   ILE C  62      31.868  50.274  35.686  1.00  0.00           N  
ATOM    983  H   ILE C  62      32.083  50.472  34.715  1.00  0.00           H  
ATOM    984  CA  ILE C  62      31.990  51.362  36.678  1.00  0.00           C  
ATOM    985  HA  ILE C  62      32.686  51.026  37.447  1.00  0.00           H  
ATOM    986  CB  ILE C  62      32.587  52.646  36.049  1.00  0.00           C  
ATOM    987  HB  ILE C  62      32.588  53.419  36.819  1.00  0.00           H  
ATOM    988  CG2 ILE C  62      34.053  52.409  35.651  1.00  0.00           C  
ATOM    989 1HG2 ILE C  62      34.120  51.669  34.853  1.00  0.00           H  
ATOM    990 2HG2 ILE C  62      34.516  53.336  35.316  1.00  0.00           H  
ATOM    991 3HG2 ILE C  62      34.614  52.061  36.518  1.00  0.00           H  
ATOM    992  CG1 ILE C  62      31.736  53.165  34.867  1.00  0.00           C  
ATOM    993 2HG1 ILE C  62      31.716  52.414  34.081  1.00  0.00           H  
ATOM    994 3HG1 ILE C  62      30.713  53.328  35.206  1.00  0.00           H  
ATOM    995  CD1 ILE C  62      32.227  54.481  34.260  1.00  0.00           C  
ATOM    996 1HD1 ILE C  62      33.178  54.332  33.749  1.00  0.00           H  
ATOM    997 2HD1 ILE C  62      31.498  54.836  33.531  1.00  0.00           H  
ATOM    998 3HD1 ILE C  62      32.341  55.231  35.043  1.00  0.00           H  
ATOM    999  C   ILE C  62      30.681  51.689  37.422  1.00  0.00           C  
ATOM   1000  O   ILE C  62      30.739  52.111  38.577  1.00  0.00           O  
ATOM   1001  N   GLN C  63      29.506  51.476  36.811  1.00  0.00           N  
ATOM   1002  H   GLN C  63      29.506  51.051  35.890  1.00  0.00           H  
ATOM   1003  CA  GLN C  63      28.210  51.734  37.460  1.00  0.00           C  
ATOM   1004  HA  GLN C  63      28.318  52.585  38.135  1.00  0.00           H  
ATOM   1005  CB  GLN C  63      27.143  52.104  36.422  1.00  0.00           C  
ATOM   1006  HB2 GLN C  63      27.092  51.341  35.642  1.00  0.00           H  
ATOM   1007  HB3 GLN C  63      26.176  52.129  36.929  1.00  0.00           H  
ATOM   1008  CG  GLN C  63      27.384  53.483  35.791  1.00  0.00           C  
ATOM   1009  HG2 GLN C  63      27.745  54.179  36.549  1.00  0.00           H  
ATOM   1010  HG3 GLN C  63      28.132  53.402  35.002  1.00  0.00           H  
ATOM   1011  CD  GLN C  63      26.083  54.034  35.226  1.00  0.00           C  
ATOM   1012  OE1 GLN C  63      25.363  54.771  35.890  1.00  0.00           O  
ATOM   1013  NE2 GLN C  63      25.721  53.647  34.024  1.00  0.00           N  
ATOM   1014 1HE2 GLN C  63      24.779  53.865  33.712  1.00  0.00           H  
ATOM   1015 2HE2 GLN C  63      26.312  53.038  33.487  1.00  0.00           H  
ATOM   1016  C   GLN C  63      27.721  50.571  38.332  1.00  0.00           C  
ATOM   1017  O   GLN C  63      26.864  50.775  39.193  1.00  0.00           O  
ATOM   1018  N   ILE C  64      28.275  49.369  38.147  1.00  0.00           N  
ATOM   1019  H   ILE C  64      28.946  49.267  37.394  1.00  0.00           H  
ATOM   1020  CA  ILE C  64      28.033  48.220  39.026  1.00  0.00           C  
ATOM   1021  HA  ILE C  64      27.046  48.318  39.479  1.00  0.00           H  
ATOM   1022  CB  ILE C  64      28.055  46.900  38.217  1.00  0.00           C  
ATOM   1023  HB  ILE C  64      29.063  46.758  37.823  1.00  0.00           H  
ATOM   1024  CG2 ILE C  64      27.748  45.712  39.144  1.00  0.00           C  
ATOM   1025 1HG2 ILE C  64      26.813  45.879  39.678  1.00  0.00           H  
ATOM   1026 2HG2 ILE C  64      27.669  44.794  38.562  1.00  0.00           H  
ATOM   1027 3HG2 ILE C  64      28.545  45.592  39.876  1.00  0.00           H  
ATOM   1028  CG1 ILE C  64      27.093  46.893  37.004  1.00  0.00           C  
ATOM   1029 2HG1 ILE C  64      27.384  47.682  36.311  1.00  0.00           H  
ATOM   1030 3HG1 ILE C  64      27.213  45.949  36.471  1.00  0.00           H  
ATOM   1031  CD1 ILE C  64      25.602  47.070  37.331  1.00  0.00           C  
ATOM   1032 1HD1 ILE C  64      25.434  48.017  37.846  1.00  0.00           H  
ATOM   1033 2HD1 ILE C  64      25.033  47.071  36.402  1.00  0.00           H  
ATOM   1034 3HD1 ILE C  64      25.247  46.247  37.952  1.00  0.00           H  
ATOM   1035  C   ILE C  64      29.049  48.225  40.176  1.00  0.00           C  
ATOM   1036  O   ILE C  64      28.669  48.193  41.346  1.00  0.00           O  
ATOM   1037  N   MET C  65      30.345  48.334  39.863  1.00  0.00           N  
ATOM   1038  H   MET C  65      30.596  48.415  38.881  1.00  0.00           H  
ATOM   1039  CA  MET C  65      31.432  48.156  40.833  1.00  0.00           C  
ATOM   1040  HA  MET C  65      31.292  47.187  41.315  1.00  0.00           H  
ATOM   1041  CB  MET C  65      32.769  48.115  40.075  1.00  0.00           C  
ATOM   1042  HB2 MET C  65      32.673  47.438  39.225  1.00  0.00           H  
ATOM   1043  HB3 MET C  65      33.005  49.111  39.697  1.00  0.00           H  
ATOM   1044  CG  MET C  65      33.918  47.618  40.962  1.00  0.00           C  
ATOM   1045  HG2 MET C  65      33.994  48.268  41.832  1.00  0.00           H  
ATOM   1046  HG3 MET C  65      33.687  46.613  41.317  1.00  0.00           H  
ATOM   1047  SD  MET C  65      35.540  47.589  40.153  1.00  0.00           S  
ATOM   1048  CE  MET C  65      35.330  46.162  39.052  1.00  0.00           C  
ATOM   1049  HE1 MET C  65      34.495  46.327  38.374  1.00  0.00           H  
ATOM   1050  HE2 MET C  65      36.237  46.024  38.466  1.00  0.00           H  
ATOM   1051  HE3 MET C  65      35.144  45.264  39.642  1.00  0.00           H  
ATOM   1052  C   MET C  65      31.434  49.216  41.947  1.00  0.00           C  
ATOM   1053  O   MET C  65      31.740  48.886  43.089  1.00  0.00           O  
ATOM   1054  N   LYS C  66      31.023  50.465  41.666  1.00  0.00           N  
ATOM   1055  H   LYS C  66      30.795  50.688  40.706  1.00  0.00           H  
ATOM   1056  CA  LYS C  66      30.889  51.519  42.695  1.00  0.00           C  
ATOM   1057  HA  LYS C  66      31.816  51.572  43.268  1.00  0.00           H  
ATOM   1058  CB  LYS C  66      30.629  52.884  42.032  1.00  0.00           C  
ATOM   1059  HB2 LYS C  66      29.887  52.770  41.241  1.00  0.00           H  
ATOM   1060  HB3 LYS C  66      30.209  53.553  42.785  1.00  0.00           H  
ATOM   1061  CG  LYS C  66      31.890  53.564  41.471  1.00  0.00           C  
ATOM   1062  HG2 LYS C  66      32.634  53.656  42.265  1.00  0.00           H  
ATOM   1063  HG3 LYS C  66      32.307  52.968  40.658  1.00  0.00           H  
ATOM   1064  CD  LYS C  66      31.515  54.964  40.958  1.00  0.00           C  
ATOM   1065  HD2 LYS C  66      30.811  54.849  40.132  1.00  0.00           H  
ATOM   1066  HD3 LYS C  66      31.020  55.515  41.760  1.00  0.00           H  
ATOM   1067  CE  LYS C  66      32.731  55.775  40.487  1.00  0.00           C  
ATOM   1068  HE2 LYS C  66      33.442  55.861  41.313  1.00  0.00           H  
ATOM   1069  HE3 LYS C  66      33.216  55.232  39.670  1.00  0.00           H  
ATOM   1070  NZ  LYS C  66      32.325  57.128  40.022  1.00  0.00           N  
ATOM   1071  HZ1 LYS C  66      31.854  57.652  40.747  1.00  0.00           H  
ATOM   1072  HZ2 LYS C  66      33.106  57.683  39.696  1.00  0.00           H  
ATOM   1073  HZ3 LYS C  66      31.681  57.049  39.233  1.00  0.00           H  
ATOM   1074  C   LYS C  66      29.787  51.251  43.735  1.00  0.00           C  
ATOM   1075  O   LYS C  66      29.833  51.840  44.816  1.00  0.00           O  
ATOM   1076  N   LYS C  67      28.789  50.409  43.431  1.00  0.00           N  
ATOM   1077  H   LYS C  67      28.825  49.926  42.542  1.00  0.00           H  
ATOM   1078  CA  LYS C  67      27.661  50.121  44.340  1.00  0.00           C  
ATOM   1079  HA  LYS C  67      27.473  50.990  44.972  1.00  0.00           H  
ATOM   1080  CB  LYS C  67      26.380  49.822  43.544  1.00  0.00           C  
ATOM   1081  HB2 LYS C  67      26.526  48.914  42.956  1.00  0.00           H  
ATOM   1082  HB3 LYS C  67      25.578  49.633  44.260  1.00  0.00           H  
ATOM   1083  CG  LYS C  67      25.931  50.953  42.608  1.00  0.00           C  
ATOM   1084  HG2 LYS C  67      25.923  51.901  43.148  1.00  0.00           H  
ATOM   1085  HG3 LYS C  67      26.626  51.027  41.771  1.00  0.00           H  
ATOM   1086  CD  LYS C  67      24.514  50.651  42.096  1.00  0.00           C  
ATOM   1087  HD2 LYS C  67      24.470  49.622  41.733  1.00  0.00           H  
ATOM   1088  HD3 LYS C  67      23.820  50.759  42.932  1.00  0.00           H  
ATOM   1089  CE  LYS C  67      24.107  51.592  40.959  1.00  0.00           C  
ATOM   1090  HE2 LYS C  67      24.409  52.610  41.221  1.00  0.00           H  
ATOM   1091  HE3 LYS C  67      24.652  51.303  40.055  1.00  0.00           H  
ATOM   1092  NZ  LYS C  67      22.640  51.547  40.733  1.00  0.00           N  
ATOM   1093  HZ1 LYS C  67      22.157  51.962  41.532  1.00  0.00           H  
ATOM   1094  HZ2 LYS C  67      22.366  52.107  39.937  1.00  0.00           H  
ATOM   1095  HZ3 LYS C  67      22.306  50.602  40.609  1.00  0.00           H  
ATOM   1096  C   LYS C  67      27.927  48.957  45.297  1.00  0.00           C  
ATOM   1097  O   LYS C  67      27.225  48.833  46.296  1.00  0.00           O  
ATOM   1098  N   LEU C  68      28.890  48.093  44.980  1.00  0.00           N  
ATOM   1099  H   LEU C  68      29.483  48.302  44.191  1.00  0.00           H  
ATOM   1100  CA  LEU C  68      29.111  46.830  45.683  1.00  0.00           C  
ATOM   1101  HA  LEU C  68      28.213  46.587  46.253  1.00  0.00           H  
ATOM   1102  CB  LEU C  68      29.331  45.700  44.662  1.00  0.00           C  
ATOM   1103  HB2 LEU C  68      30.224  45.936  44.080  1.00  0.00           H  
ATOM   1104  HB3 LEU C  68      29.525  44.774  45.203  1.00  0.00           H  
ATOM   1105  CG  LEU C  68      28.154  45.472  43.689  1.00  0.00           C  
ATOM   1106  HG  LEU C  68      27.982  46.376  43.109  1.00  0.00           H  
ATOM   1107  CD1 LEU C  68      28.525  44.350  42.723  1.00  0.00           C  
ATOM   1108 1HD1 LEU C  68      28.704  43.427  43.273  1.00  0.00           H  
ATOM   1109 2HD1 LEU C  68      27.721  44.198  42.003  1.00  0.00           H  
ATOM   1110 3HD1 LEU C  68      29.431  44.632  42.191  1.00  0.00           H  
ATOM   1111  CD2 LEU C  68      26.841  45.089  44.376  1.00  0.00           C  
ATOM   1112 1HD2 LEU C  68      26.522  45.876  45.059  1.00  0.00           H  
ATOM   1113 2HD2 LEU C  68      26.063  44.967  43.628  1.00  0.00           H  
ATOM   1114 3HD2 LEU C  68      26.948  44.155  44.921  1.00  0.00           H  
ATOM   1115  C   LEU C  68      30.252  46.934  46.703  1.00  0.00           C  
ATOM   1116  O   LEU C  68      31.258  47.605  46.481  1.00  0.00           O  
ATOM   1117  N   ASN C  69      30.079  46.252  47.832  1.00  0.00           N  
ATOM   1118  H   ASN C  69      29.213  45.739  47.948  1.00  0.00           H  
ATOM   1119  CA  ASN C  69      31.071  46.147  48.898  1.00  0.00           C  
ATOM   1120  HA  ASN C  69      32.069  46.129  48.455  1.00  0.00           H  
ATOM   1121  CB  ASN C  69      30.949  47.390  49.804  1.00  0.00           C  
ATOM   1122  HB2 ASN C  69      30.991  48.288  49.189  1.00  0.00           H  
ATOM   1123  HB3 ASN C  69      29.988  47.377  50.319  1.00  0.00           H  
ATOM   1124  CG  ASN C  69      32.058  47.487  50.836  1.00  0.00           C  
ATOM   1125  OD1 ASN C  69      32.987  46.696  50.891  1.00  0.00           O  
ATOM   1126  ND2 ASN C  69      32.011  48.489  51.682  1.00  0.00           N  
ATOM   1127 1HD2 ASN C  69      32.752  48.561  52.356  1.00  0.00           H  
ATOM   1128 2HD2 ASN C  69      31.278  49.173  51.627  1.00  0.00           H  
ATOM   1129  C   ASN C  69      30.857  44.829  49.662  1.00  0.00           C  
ATOM   1130  O   ASN C  69      30.037  44.756  50.581  1.00  0.00           O  
ATOM   1131  N   HIS C  70      31.561  43.774  49.249  1.00  0.00           N  
ATOM   1132  H   HIS C  70      32.193  43.900  48.460  1.00  0.00           H  
ATOM   1133  CA  HIS C  70      31.486  42.437  49.853  1.00  0.00           C  
ATOM   1134  HA  HIS C  70      31.217  42.546  50.905  1.00  0.00           H  
ATOM   1135  CB  HIS C  70      30.380  41.631  49.160  1.00  0.00           C  
ATOM   1136  HB2 HIS C  70      29.465  42.214  49.210  1.00  0.00           H  
ATOM   1137  HB3 HIS C  70      30.637  41.484  48.111  1.00  0.00           H  
ATOM   1138  CG  HIS C  70      30.090  40.290  49.787  1.00  0.00           C  
ATOM   1139  ND1 HIS C  70      30.680  39.082  49.414  1.00  0.00           N  
ATOM   1140  CE1 HIS C  70      30.132  38.147  50.210  1.00  0.00           C  
ATOM   1141  HE1 HIS C  70      30.365  37.089  50.173  1.00  0.00           H  
ATOM   1142  NE2 HIS C  70      29.254  38.705  51.058  1.00  0.00           N  
ATOM   1143  HE2 HIS C  70      28.691  38.196  51.740  1.00  0.00           H  
ATOM   1144  CD2 HIS C  70      29.220  40.060  50.811  1.00  0.00           C  
ATOM   1145  HD2 HIS C  70      28.605  40.800  51.306  1.00  0.00           H  
ATOM   1146  C   HIS C  70      32.836  41.713  49.791  1.00  0.00           C  
ATOM   1147  O   HIS C  70      33.679  42.009  48.945  1.00  0.00           O  
ATOM   1148  N   ALA C  71      33.050  40.751  50.689  1.00  0.00           N  
ATOM   1149  H   ALA C  71      32.296  40.494  51.309  1.00  0.00           H  
ATOM   1150  CA  ALA C  71      34.313  40.023  50.803  1.00  0.00           C  
ATOM   1151  HA  ALA C  71      35.123  40.749  50.890  1.00  0.00           H  
ATOM   1152  CB  ALA C  71      34.256  39.207  52.100  1.00  0.00           C  
ATOM   1153  HB1 ALA C  71      33.451  38.472  52.043  1.00  0.00           H  
ATOM   1154  HB2 ALA C  71      35.203  38.688  52.245  1.00  0.00           H  
ATOM   1155  HB3 ALA C  71      34.082  39.870  52.948  1.00  0.00           H  
ATOM   1156  C   ALA C  71      34.633  39.130  49.584  1.00  0.00           C  
ATOM   1157  O   ALA C  71      35.807  38.942  49.266  1.00  0.00           O  
ATOM   1158  N   ASN C  72      33.610  38.623  48.888  1.00  0.00           N  
ATOM   1159  H   ASN C  72      32.671  38.833  49.213  1.00  0.00           H  
ATOM   1160  CA  ASN C  72      33.722  37.687  47.761  1.00  0.00           C  
ATOM   1161  HA  ASN C  72      34.751  37.327  47.715  1.00  0.00           H  
ATOM   1162  CB  ASN C  72      32.831  36.463  48.033  1.00  0.00           C  
ATOM   1163  HB2 ASN C  72      31.787  36.769  48.075  1.00  0.00           H  
ATOM   1164  HB3 ASN C  72      32.944  35.747  47.219  1.00  0.00           H  
ATOM   1165  CG  ASN C  72      33.187  35.754  49.325  1.00  0.00           C  
ATOM   1166  OD1 ASN C  72      32.429  35.763  50.282  1.00  0.00           O  
ATOM   1167  ND2 ASN C  72      34.361  35.171  49.394  1.00  0.00           N  
ATOM   1168 1HD2 ASN C  72      34.544  34.548  50.184  1.00  0.00           H  
ATOM   1169 2HD2 ASN C  72      34.963  35.128  48.580  1.00  0.00           H  
ATOM   1170  C   ASN C  72      33.450  38.343  46.389  1.00  0.00           C  
ATOM   1171  O   ASN C  72      33.244  37.650  45.394  1.00  0.00           O  
ATOM   1172  N   VAL C  73      33.485  39.676  46.310  1.00  0.00           N  
ATOM   1173  H   VAL C  73      33.650  40.194  47.164  1.00  0.00           H  
ATOM   1174  CA  VAL C  73      33.485  40.454  45.057  1.00  0.00           C  
ATOM   1175  HA  VAL C  73      33.703  39.800  44.212  1.00  0.00           H  
ATOM   1176  CB  VAL C  73      32.122  41.139  44.804  1.00  0.00           C  
ATOM   1177  HB  VAL C  73      31.958  41.900  45.568  1.00  0.00           H  
ATOM   1178  CG1 VAL C  73      32.085  41.816  43.427  1.00  0.00           C  
ATOM   1179 1HG1 VAL C  73      32.297  41.088  42.642  1.00  0.00           H  
ATOM   1180 2HG1 VAL C  73      31.103  42.255  43.252  1.00  0.00           H  
ATOM   1181 3HG1 VAL C  73      32.820  42.620  43.379  1.00  0.00           H  
ATOM   1182  CG2 VAL C  73      30.944  40.154  44.864  1.00  0.00           C  
ATOM   1183 1HG2 VAL C  73      30.851  39.742  45.869  1.00  0.00           H  
ATOM   1184 2HG2 VAL C  73      30.015  40.668  44.623  1.00  0.00           H  
ATOM   1185 3HG2 VAL C  73      31.100  39.339  44.158  1.00  0.00           H  
ATOM   1186  C   VAL C  73      34.603  41.491  45.161  1.00  0.00           C  
ATOM   1187  O   VAL C  73      34.793  42.064  46.237  1.00  0.00           O  
ATOM   1188  N   VAL C  74      35.361  41.746  44.090  1.00  0.00           N  
ATOM   1189  H   VAL C  74      35.183  41.262  43.216  1.00  0.00           H  
ATOM   1190  CA  VAL C  74      36.439  42.753  44.152  1.00  0.00           C  
ATOM   1191  HA  VAL C  74      37.084  42.463  44.976  1.00  0.00           H  
ATOM   1192  CB  VAL C  74      37.335  42.778  42.898  1.00  0.00           C  
ATOM   1193  HB  VAL C  74      38.040  43.602  43.005  1.00  0.00           H  
ATOM   1194  CG1 VAL C  74      38.154  41.483  42.816  1.00  0.00           C  
ATOM   1195 1HG1 VAL C  74      37.499  40.628  42.650  1.00  0.00           H  
ATOM   1196 2HG1 VAL C  74      38.870  41.556  41.999  1.00  0.00           H  
ATOM   1197 3HG1 VAL C  74      38.711  41.337  43.742  1.00  0.00           H  
ATOM   1198  CG2 VAL C  74      36.566  43.001  41.591  1.00  0.00           C  
ATOM   1199 1HG2 VAL C  74      35.992  43.925  41.650  1.00  0.00           H  
ATOM   1200 2HG2 VAL C  74      37.270  43.087  40.764  1.00  0.00           H  
ATOM   1201 3HG2 VAL C  74      35.888  42.170  41.397  1.00  0.00           H  
ATOM   1202  C   VAL C  74      35.908  44.154  44.490  1.00  0.00           C  
ATOM   1203  O   VAL C  74      34.846  44.564  44.018  1.00  0.00           O  
ATOM   1204  N   LYS C  75      36.632  44.890  45.340  1.00  0.00           N  
ATOM   1205  H   LYS C  75      37.442  44.448  45.769  1.00  0.00           H  
ATOM   1206  CA  LYS C  75      36.370  46.305  45.646  1.00  0.00           C  
ATOM   1207  HA  LYS C  75      35.297  46.488  45.574  1.00  0.00           H  
ATOM   1208  CB  LYS C  75      36.830  46.662  47.071  1.00  0.00           C  
ATOM   1209  HB2 LYS C  75      37.897  46.448  47.167  1.00  0.00           H  
ATOM   1210  HB3 LYS C  75      36.688  47.734  47.214  1.00  0.00           H  
ATOM   1211  CG  LYS C  75      36.063  45.925  48.179  1.00  0.00           C  
ATOM   1212  HG2 LYS C  75      34.991  46.062  48.037  1.00  0.00           H  
ATOM   1213  HG3 LYS C  75      36.297  44.863  48.129  1.00  0.00           H  
ATOM   1214  CD  LYS C  75      36.465  46.473  49.556  1.00  0.00           C  
ATOM   1215  HD2 LYS C  75      37.553  46.454  49.647  1.00  0.00           H  
ATOM   1216  HD3 LYS C  75      36.136  47.512  49.624  1.00  0.00           H  
ATOM   1217  CE  LYS C  75      35.816  45.679  50.701  1.00  0.00           C  
ATOM   1218  HE2 LYS C  75      35.201  46.367  51.289  1.00  0.00           H  
ATOM   1219  HE3 LYS C  75      35.138  44.931  50.277  1.00  0.00           H  
ATOM   1220  NZ  LYS C  75      36.822  45.032  51.580  1.00  0.00           N  
ATOM   1221  HZ1 LYS C  75      37.464  45.714  51.949  1.00  0.00           H  
ATOM   1222  HZ2 LYS C  75      36.381  44.578  52.381  1.00  0.00           H  
ATOM   1223  HZ3 LYS C  75      37.370  44.351  51.055  1.00  0.00           H  
ATOM   1224  C   LYS C  75      37.062  47.219  44.635  1.00  0.00           C  
ATOM   1225  O   LYS C  75      38.153  46.905  44.156  1.00  0.00           O  
ATOM   1226  N   ALA C  76      36.455  48.377  44.378  1.00  0.00           N  
ATOM   1227  H   ALA C  76      35.561  48.550  44.805  1.00  0.00           H  
ATOM   1228  CA  ALA C  76      37.079  49.468  43.635  1.00  0.00           C  
ATOM   1229  HA  ALA C  76      37.514  49.058  42.722  1.00  0.00           H  
ATOM   1230  CB  ALA C  76      35.999  50.480  43.232  1.00  0.00           C  
ATOM   1231  HB1 ALA C  76      35.546  50.920  44.122  1.00  0.00           H  
ATOM   1232  HB2 ALA C  76      36.451  51.275  42.635  1.00  0.00           H  
ATOM   1233  HB3 ALA C  76      35.231  49.989  42.637  1.00  0.00           H  
ATOM   1234  C   ALA C  76      38.204  50.146  44.443  1.00  0.00           C  
ATOM   1235  O   ALA C  76      38.124  50.244  45.673  1.00  0.00           O  
ATOM   1236  N   CYS C  77      39.208  50.661  43.735  1.00  0.00           N  
ATOM   1237  H   CYS C  77      39.152  50.585  42.724  1.00  0.00           H  
ATOM   1238  CA  CYS C  77      40.347  51.407  44.273  1.00  0.00           C  
ATOM   1239  HA  CYS C  77      40.257  51.488  45.357  1.00  0.00           H  
ATOM   1240  CB  CYS C  77      41.648  50.656  43.947  1.00  0.00           C  
ATOM   1241  HB2 CYS C  77      41.685  50.444  42.878  1.00  0.00           H  
ATOM   1242  HB3 CYS C  77      42.506  51.278  44.210  1.00  0.00           H  
ATOM   1243  SG  CYS C  77      41.728  49.106  44.887  1.00  0.00           S  
ATOM   1244  HG  CYS C  77      42.761  48.570  44.225  1.00  0.00           H  
ATOM   1245  C   CYS C  77      40.387  52.829  43.697  1.00  0.00           C  
ATOM   1246  O   CYS C  77      39.993  53.051  42.553  1.00  0.00           O  
ATOM   1247  N   ASP C  78      40.913  53.780  44.471  1.00  0.00           N  
ATOM   1248  H   ASP C  78      41.279  53.527  45.374  1.00  0.00           H  
ATOM   1249  CA  ASP C  78      41.143  55.156  44.020  1.00  0.00           C  
ATOM   1250  HA  ASP C  78      40.526  55.347  43.140  1.00  0.00           H  
ATOM   1251  CB  ASP C  78      40.701  56.143  45.111  1.00  0.00           C  
ATOM   1252  HB2 ASP C  78      39.707  55.855  45.459  1.00  0.00           H  
ATOM   1253  HB3 ASP C  78      41.389  56.078  45.955  1.00  0.00           H  
ATOM   1254  CG  ASP C  78      40.625  57.592  44.622  1.00  0.00           C  
ATOM   1255  OD1 ASP C  78      40.715  57.842  43.399  1.00  0.00           O  
ATOM   1256  OD2 ASP C  78      40.419  58.489  45.469  1.00  0.00           O  
ATOM   1257  C   ASP C  78      42.614  55.346  43.612  1.00  0.00           C  
ATOM   1258  O   ASP C  78      43.520  54.818  44.261  1.00  0.00           O  
ATOM   1259  N   VAL C  79      42.842  56.079  42.521  1.00  0.00           N  
ATOM   1260  H   VAL C  79      42.055  56.590  42.138  1.00  0.00           H  
ATOM   1261  CA  VAL C  79      44.143  56.226  41.847  1.00  0.00           C  
ATOM   1262  HA  VAL C  79      44.921  56.012  42.578  1.00  0.00           H  
ATOM   1263  CB  VAL C  79      44.300  55.230  40.676  1.00  0.00           C  
ATOM   1264  HB  VAL C  79      45.118  55.567  40.038  1.00  0.00           H  
ATOM   1265  CG1 VAL C  79      44.681  53.849  41.202  1.00  0.00           C  
ATOM   1266 1HG1 VAL C  79      43.893  53.456  41.844  1.00  0.00           H  
ATOM   1267 2HG1 VAL C  79      44.834  53.168  40.368  1.00  0.00           H  
ATOM   1268 3HG1 VAL C  79      45.606  53.919  41.775  1.00  0.00           H  
ATOM   1269  CG2 VAL C  79      43.054  55.085  39.791  1.00  0.00           C  
ATOM   1270 1HG2 VAL C  79      42.706  56.071  39.491  1.00  0.00           H  
ATOM   1271 2HG2 VAL C  79      43.302  54.505  38.902  1.00  0.00           H  
ATOM   1272 3HG2 VAL C  79      42.257  54.578  40.336  1.00  0.00           H  
ATOM   1273  C   VAL C  79      44.369  57.655  41.342  1.00  0.00           C  
ATOM   1274  O   VAL C  79      43.398  58.346  41.011  1.00  0.00           O  
ATOM   1275  N   PRO C  80      45.635  58.114  41.262  1.00  0.00           N  
ATOM   1276  CD  PRO C  80      46.857  57.414  41.641  1.00  0.00           C  
ATOM   1277  HD2 PRO C  80      46.877  56.392  41.263  1.00  0.00           H  
ATOM   1278  HD3 PRO C  80      46.947  57.414  42.729  1.00  0.00           H  
ATOM   1279  CG  PRO C  80      48.008  58.216  41.031  1.00  0.00           C  
ATOM   1280  HG2 PRO C  80      48.198  57.874  40.013  1.00  0.00           H  
ATOM   1281  HG3 PRO C  80      48.912  58.157  41.632  1.00  0.00           H  
ATOM   1282  CB  PRO C  80      47.450  59.635  41.000  1.00  0.00           C  
ATOM   1283  HB2 PRO C  80      47.947  60.251  40.250  1.00  0.00           H  
ATOM   1284  HB3 PRO C  80      47.549  60.083  41.990  1.00  0.00           H  
ATOM   1285  CA  PRO C  80      45.967  59.413  40.688  1.00  0.00           C  
ATOM   1286  HA  PRO C  80      45.379  60.193  41.173  1.00  0.00           H  
ATOM   1287  C   PRO C  80      45.691  59.458  39.179  1.00  0.00           C  
ATOM   1288  O   PRO C  80      45.660  58.438  38.487  1.00  0.00           O  
ATOM   1289  N   GLU C  81      45.515  60.672  38.665  1.00  0.00           N  
ATOM   1290  H   GLU C  81      45.627  61.472  39.271  1.00  0.00           H  
ATOM   1291  CA  GLU C  81      45.276  60.909  37.241  1.00  0.00           C  
ATOM   1292  HA  GLU C  81      44.608  60.127  36.877  1.00  0.00           H  
ATOM   1293  CB  GLU C  81      44.555  62.252  37.045  1.00  0.00           C  
ATOM   1294  HB2 GLU C  81      45.123  63.049  37.530  1.00  0.00           H  
ATOM   1295  HB3 GLU C  81      44.491  62.469  35.978  1.00  0.00           H  
ATOM   1296  CG  GLU C  81      43.133  62.191  37.625  1.00  0.00           C  
ATOM   1297  HG2 GLU C  81      42.597  61.360  37.161  1.00  0.00           H  
ATOM   1298  HG3 GLU C  81      43.183  62.000  38.700  1.00  0.00           H  
ATOM   1299  CD  GLU C  81      42.362  63.489  37.379  1.00  0.00           C  
ATOM   1300  OE1 GLU C  81      41.849  63.681  36.252  1.00  0.00           O  
ATOM   1301  OE2 GLU C  81      42.271  64.318  38.312  1.00  0.00           O  
ATOM   1302  C   GLU C  81      46.565  60.797  36.411  1.00  0.00           C  
ATOM   1303  O   GLU C  81      47.675  60.912  36.931  1.00  0.00           O  
ATOM   1304  N   GLU C  82      46.408  60.544  35.107  1.00  0.00           N  
ATOM   1305  H   GLU C  82      45.466  60.532  34.745  1.00  0.00           H  
ATOM   1306  CA  GLU C  82      47.498  60.335  34.133  1.00  0.00           C  
ATOM   1307  HA  GLU C  82      47.013  60.065  33.196  1.00  0.00           H  
ATOM   1308  CB  GLU C  82      48.231  61.668  33.838  1.00  0.00           C  
ATOM   1309  HB2 GLU C  82      48.655  62.076  34.757  1.00  0.00           H  
ATOM   1310  HB3 GLU C  82      49.049  61.487  33.142  1.00  0.00           H  
ATOM   1311  CG  GLU C  82      47.266  62.694  33.210  1.00  0.00           C  
ATOM   1312  HG2 GLU C  82      46.833  62.262  32.306  1.00  0.00           H  
ATOM   1313  HG3 GLU C  82      46.446  62.889  33.905  1.00  0.00           H  
ATOM   1314  CD  GLU C  82      47.929  64.030  32.851  1.00  0.00           C  
ATOM   1315  OE1 GLU C  82      48.720  64.108  31.889  1.00  0.00           O  
ATOM   1316  OE2 GLU C  82      47.609  65.070  33.481  1.00  0.00           O  
ATOM   1317  C   GLU C  82      48.416  59.114  34.405  1.00  0.00           C  
ATOM   1318  O   GLU C  82      49.362  58.885  33.658  1.00  0.00           O  
ATOM   1319  N   LEU C  83      48.083  58.260  35.388  1.00  0.00           N  
ATOM   1320  H   LEU C  83      47.352  58.553  36.020  1.00  0.00           H  
ATOM   1321  CA  LEU C  83      48.808  57.016  35.713  1.00  0.00           C  
ATOM   1322  HA  LEU C  83      49.859  57.262  35.874  1.00  0.00           H  
ATOM   1323  CB  LEU C  83      48.214  56.451  37.026  1.00  0.00           C  
ATOM   1324  HB2 LEU C  83      48.381  57.179  37.819  1.00  0.00           H  
ATOM   1325  HB3 LEU C  83      47.135  56.345  36.899  1.00  0.00           H  
ATOM   1326  CG  LEU C  83      48.769  55.082  37.479  1.00  0.00           C  
ATOM   1327  HG  LEU C  83      48.568  54.334  36.712  1.00  0.00           H  
ATOM   1328  CD1 LEU C  83      50.272  55.131  37.749  1.00  0.00           C  
ATOM   1329 1HD1 LEU C  83      50.487  55.897  38.493  1.00  0.00           H  
ATOM   1330 2HD1 LEU C  83      50.616  54.167  38.118  1.00  0.00           H  
ATOM   1331 3HD1 LEU C  83      50.809  55.353  36.828  1.00  0.00           H  
ATOM   1332  CD2 LEU C  83      48.071  54.622  38.759  1.00  0.00           C  
ATOM   1333 1HD2 LEU C  83      46.995  54.566  38.593  1.00  0.00           H  
ATOM   1334 2HD2 LEU C  83      48.431  53.631  39.036  1.00  0.00           H  
ATOM   1335 3HD2 LEU C  83      48.276  55.320  39.570  1.00  0.00           H  
ATOM   1336  C   LEU C  83      48.757  55.946  34.602  1.00  0.00           C  
ATOM   1337  O   LEU C  83      49.738  55.243  34.377  1.00  0.00           O  
ATOM   1338  N   ASN C  84      47.592  55.782  33.966  1.00  0.00           N  
ATOM   1339  H   ASN C  84      46.857  56.423  34.207  1.00  0.00           H  
ATOM   1340  CA  ASN C  84      47.287  54.636  33.096  1.00  0.00           C  
ATOM   1341  HA  ASN C  84      48.155  53.973  33.046  1.00  0.00           H  
ATOM   1342  CB  ASN C  84      46.129  53.846  33.743  1.00  0.00           C  
ATOM   1343  HB2 ASN C  84      46.460  53.441  34.700  1.00  0.00           H  
ATOM   1344  HB3 ASN C  84      45.298  54.524  33.931  1.00  0.00           H  
ATOM   1345  CG  ASN C  84      45.620  52.689  32.895  1.00  0.00           C  
ATOM   1346  OD1 ASN C  84      46.343  52.046  32.149  1.00  0.00           O  
ATOM   1347  ND2 ASN C  84      44.341  52.399  32.983  1.00  0.00           N  
ATOM   1348 1HD2 ASN C  84      43.973  51.607  32.462  1.00  0.00           H  
ATOM   1349 2HD2 ASN C  84      43.747  52.903  33.610  1.00  0.00           H  
ATOM   1350  C   ASN C  84      46.983  55.048  31.646  1.00  0.00           C  
ATOM   1351  O   ASN C  84      47.647  54.602  30.713  1.00  0.00           O  
ATOM   1352  N   ILE C  85      45.970  55.894  31.449  1.00  0.00           N  
ATOM   1353  H   ILE C  85      45.517  56.294  32.255  1.00  0.00           H  
ATOM   1354  CA  ILE C  85      45.458  56.287  30.131  1.00  0.00           C  
ATOM   1355  HA  ILE C  85      46.050  55.808  29.351  1.00  0.00           H  
ATOM   1356  CB  ILE C  85      43.989  55.824  29.976  1.00  0.00           C  
ATOM   1357  HB  ILE C  85      43.448  56.154  30.865  1.00  0.00           H  
ATOM   1358  CG2 ILE C  85      43.279  56.463  28.773  1.00  0.00           C  
ATOM   1359 1HG2 ILE C  85      43.790  56.223  27.840  1.00  0.00           H  
ATOM   1360 2HG2 ILE C  85      42.259  56.082  28.737  1.00  0.00           H  
ATOM   1361 3HG2 ILE C  85      43.210  57.545  28.895  1.00  0.00           H  
ATOM   1362  CG1 ILE C  85      43.850  54.285  29.907  1.00  0.00           C  
ATOM   1363 2HG1 ILE C  85      44.299  53.860  30.799  1.00  0.00           H  
ATOM   1364 3HG1 ILE C  85      42.790  54.029  29.932  1.00  0.00           H  
ATOM   1365  CD1 ILE C  85      44.480  53.586  28.692  1.00  0.00           C  
ATOM   1366 1HD1 ILE C  85      45.550  53.781  28.648  1.00  0.00           H  
ATOM   1367 2HD1 ILE C  85      44.331  52.510  28.786  1.00  0.00           H  
ATOM   1368 3HD1 ILE C  85      44.004  53.919  27.769  1.00  0.00           H  
ATOM   1369  C   ILE C  85      45.612  57.795  29.956  1.00  0.00           C  
ATOM   1370  O   ILE C  85      45.238  58.564  30.842  1.00  0.00           O  
ATOM   1371  N   LEU C  86      46.119  58.206  28.790  1.00  0.00           N  
ATOM   1372  H   LEU C  86      46.473  57.501  28.164  1.00  0.00           H  
ATOM   1373  CA  LEU C  86      46.269  59.615  28.406  1.00  0.00           C  
ATOM   1374  HA  LEU C  86      46.019  60.258  29.251  1.00  0.00           H  
ATOM   1375  CB  LEU C  86      47.737  59.879  28.020  1.00  0.00           C  
ATOM   1376  HB2 LEU C  86      47.984  59.266  27.152  1.00  0.00           H  
ATOM   1377  HB3 LEU C  86      47.828  60.925  27.720  1.00  0.00           H  
ATOM   1378  CG  LEU C  86      48.774  59.603  29.126  1.00  0.00           C  
ATOM   1379  HG  LEU C  86      48.738  58.549  29.402  1.00  0.00           H  
ATOM   1380  CD1 LEU C  86      50.173  59.905  28.588  1.00  0.00           C  
ATOM   1381 1HD1 LEU C  86      50.249  60.961  28.323  1.00  0.00           H  
ATOM   1382 2HD1 LEU C  86      50.915  59.678  29.354  1.00  0.00           H  
ATOM   1383 3HD1 LEU C  86      50.362  59.306  27.698  1.00  0.00           H  
ATOM   1384  CD2 LEU C  86      48.542  60.447  30.378  1.00  0.00           C  
ATOM   1385 1HD2 LEU C  86      47.592  60.186  30.837  1.00  0.00           H  
ATOM   1386 2HD2 LEU C  86      49.331  60.248  31.104  1.00  0.00           H  
ATOM   1387 3HD2 LEU C  86      48.548  61.509  30.129  1.00  0.00           H  
ATOM   1388  C   LEU C  86      45.334  60.042  27.264  1.00  0.00           C  
ATOM   1389  O   LEU C  86      45.031  61.225  27.148  1.00  0.00           O  
ATOM   1390  N   ILE C  87      44.880  59.102  26.423  1.00  0.00           N  
ATOM   1391  H   ILE C  87      45.164  58.151  26.580  1.00  0.00           H  
ATOM   1392  CA  ILE C  87      44.202  59.409  25.146  1.00  0.00           C  
ATOM   1393  HA  ILE C  87      44.170  60.493  25.027  1.00  0.00           H  
ATOM   1394  CB  ILE C  87      45.007  58.867  23.944  1.00  0.00           C  
ATOM   1395  HB  ILE C  87      44.470  59.148  23.036  1.00  0.00           H  
ATOM   1396  CG2 ILE C  87      46.389  59.540  23.887  1.00  0.00           C  
ATOM   1397 1HG2 ILE C  87      47.026  59.191  24.698  1.00  0.00           H  
ATOM   1398 2HG2 ILE C  87      46.872  59.322  22.934  1.00  0.00           H  
ATOM   1399 3HG2 ILE C  87      46.273  60.623  23.962  1.00  0.00           H  
ATOM   1400  CG1 ILE C  87      45.121  57.326  23.975  1.00  0.00           C  
ATOM   1401 2HG1 ILE C  87      45.776  57.016  24.791  1.00  0.00           H  
ATOM   1402 3HG1 ILE C  87      44.136  56.899  24.157  1.00  0.00           H  
ATOM   1403  CD1 ILE C  87      45.643  56.728  22.663  1.00  0.00           C  
ATOM   1404 1HD1 ILE C  87      46.669  57.049  22.480  1.00  0.00           H  
ATOM   1405 2HD1 ILE C  87      45.625  55.640  22.729  1.00  0.00           H  
ATOM   1406 3HD1 ILE C  87      45.008  57.042  21.835  1.00  0.00           H  
ATOM   1407  C   ILE C  87      42.733  58.980  25.056  1.00  0.00           C  
ATOM   1408  O   ILE C  87      42.072  59.328  24.082  1.00  0.00           O  
ATOM   1409  N   HIS C  88      42.205  58.248  26.043  1.00  0.00           N  
ATOM   1410  H   HIS C  88      42.769  58.027  26.847  1.00  0.00           H  
ATOM   1411  CA  HIS C  88      40.796  57.842  26.060  1.00  0.00           C  
ATOM   1412  HA  HIS C  88      40.333  58.191  25.136  1.00  0.00           H  
ATOM   1413  CB  HIS C  88      40.642  56.312  26.035  1.00  0.00           C  
ATOM   1414  HB2 HIS C  88      41.076  55.875  26.930  1.00  0.00           H  
ATOM   1415  HB3 HIS C  88      39.580  56.064  26.027  1.00  0.00           H  
ATOM   1416  CG  HIS C  88      41.285  55.692  24.816  1.00  0.00           C  
ATOM   1417  ND1 HIS C  88      42.330  54.766  24.825  1.00  0.00           N  
ATOM   1418  CE1 HIS C  88      42.683  54.602  23.540  1.00  0.00           C  
ATOM   1419  HE1 HIS C  88      43.502  53.979  23.207  1.00  0.00           H  
ATOM   1420  NE2 HIS C  88      41.924  55.366  22.734  1.00  0.00           N  
ATOM   1421  HE2 HIS C  88      42.060  55.500  21.731  1.00  0.00           H  
ATOM   1422  CD2 HIS C  88      41.032  56.054  23.525  1.00  0.00           C  
ATOM   1423  HD2 HIS C  88      40.324  56.806  23.200  1.00  0.00           H  
ATOM   1424  C   HIS C  88      40.012  58.536  27.170  1.00  0.00           C  
ATOM   1425  O   HIS C  88      40.484  58.736  28.287  1.00  0.00           O  
ATOM   1426  N   ASP C  89      38.787  58.900  26.816  1.00  0.00           N  
ATOM   1427  H   ASP C  89      38.503  58.687  25.863  1.00  0.00           H  
ATOM   1428  CA  ASP C  89      37.844  59.754  27.544  1.00  0.00           C  
ATOM   1429  HA  ASP C  89      38.407  60.513  28.089  1.00  0.00           H  
ATOM   1430  CB  ASP C  89      36.967  60.469  26.492  1.00  0.00           C  
ATOM   1431  HB2 ASP C  89      36.159  61.013  26.984  1.00  0.00           H  
ATOM   1432  HB3 ASP C  89      37.590  61.208  25.983  1.00  0.00           H  
ATOM   1433  CG  ASP C  89      36.398  59.519  25.426  1.00  0.00           C  
ATOM   1434  OD1 ASP C  89      37.168  58.980  24.594  1.00  0.00           O  
ATOM   1435  OD2 ASP C  89      35.180  59.229  25.450  1.00  0.00           O  
ATOM   1436  C   ASP C  89      37.011  58.988  28.596  1.00  0.00           C  
ATOM   1437  O   ASP C  89      36.040  59.515  29.144  1.00  0.00           O  
ATOM   1438  N   VAL C  90      37.391  57.739  28.886  1.00  0.00           N  
ATOM   1439  H   VAL C  90      38.264  57.421  28.493  1.00  0.00           H  
ATOM   1440  CA  VAL C  90      36.699  56.856  29.834  1.00  0.00           C  
ATOM   1441  HA  VAL C  90      35.637  57.052  29.717  1.00  0.00           H  
ATOM   1442  CB  VAL C  90      36.907  55.363  29.507  1.00  0.00           C  
ATOM   1443  HB  VAL C  90      36.383  54.778  30.264  1.00  0.00           H  
ATOM   1444  CG1 VAL C  90      36.296  55.004  28.146  1.00  0.00           C  
ATOM   1445 1HG1 VAL C  90      36.815  55.528  27.344  1.00  0.00           H  
ATOM   1446 2HG1 VAL C  90      36.371  53.929  27.983  1.00  0.00           H  
ATOM   1447 3HG1 VAL C  90      35.242  55.285  28.133  1.00  0.00           H  
ATOM   1448  CG2 VAL C  90      38.379  54.926  29.510  1.00  0.00           C  
ATOM   1449 1HG2 VAL C  90      38.830  55.130  30.480  1.00  0.00           H  
ATOM   1450 2HG2 VAL C  90      38.432  53.852  29.338  1.00  0.00           H  
ATOM   1451 3HG2 VAL C  90      38.941  55.442  28.733  1.00  0.00           H  
ATOM   1452  C   VAL C  90      37.091  57.154  31.291  1.00  0.00           C  
ATOM   1453  O   VAL C  90      38.251  57.482  31.561  1.00  0.00           O  
ATOM   1454  N   PRO C  91      36.171  57.000  32.263  1.00  0.00           N  
ATOM   1455  CD  PRO C  91      34.730  56.897  32.099  1.00  0.00           C  
ATOM   1456  HD2 PRO C  91      34.450  55.851  31.964  1.00  0.00           H  
ATOM   1457  HD3 PRO C  91      34.364  57.502  31.269  1.00  0.00           H  
ATOM   1458  CG  PRO C  91      34.156  57.436  33.406  1.00  0.00           C  
ATOM   1459  HG2 PRO C  91      33.153  57.059  33.596  1.00  0.00           H  
ATOM   1460  HG3 PRO C  91      34.160  58.526  33.383  1.00  0.00           H  
ATOM   1461  CB  PRO C  91      35.172  56.937  34.433  1.00  0.00           C  
ATOM   1462  HB2 PRO C  91      34.970  55.890  34.667  1.00  0.00           H  
ATOM   1463  HB3 PRO C  91      35.161  57.542  35.341  1.00  0.00           H  
ATOM   1464  CA  PRO C  91      36.504  57.060  33.686  1.00  0.00           C  
ATOM   1465  HA  PRO C  91      36.943  58.036  33.895  1.00  0.00           H  
ATOM   1466  C   PRO C  91      37.493  55.964  34.107  1.00  0.00           C  
ATOM   1467  O   PRO C  91      37.571  54.899  33.490  1.00  0.00           O  
ATOM   1468  N   LEU C  92      38.235  56.199  35.190  1.00  0.00           N  
ATOM   1469  H   LEU C  92      38.076  57.043  35.721  1.00  0.00           H  
ATOM   1470  CA  LEU C  92      39.211  55.231  35.694  1.00  0.00           C  
ATOM   1471  HA  LEU C  92      39.788  54.863  34.844  1.00  0.00           H  
ATOM   1472  CB  LEU C  92      40.182  55.911  36.678  1.00  0.00           C  
ATOM   1473  HB2 LEU C  92      39.605  56.272  37.531  1.00  0.00           H  
ATOM   1474  HB3 LEU C  92      40.887  55.165  37.048  1.00  0.00           H  
ATOM   1475  CG  LEU C  92      40.974  57.093  36.080  1.00  0.00           C  
ATOM   1476  HG  LEU C  92      40.278  57.838  35.694  1.00  0.00           H  
ATOM   1477  CD1 LEU C  92      41.826  57.763  37.157  1.00  0.00           C  
ATOM   1478 1HD1 LEU C  92      42.624  57.097  37.479  1.00  0.00           H  
ATOM   1479 2HD1 LEU C  92      42.267  58.676  36.760  1.00  0.00           H  
ATOM   1480 3HD1 LEU C  92      41.205  58.026  38.014  1.00  0.00           H  
ATOM   1481  CD2 LEU C  92      41.910  56.655  34.948  1.00  0.00           C  
ATOM   1482 1HD2 LEU C  92      41.327  56.296  34.100  1.00  0.00           H  
ATOM   1483 2HD2 LEU C  92      42.497  57.511  34.614  1.00  0.00           H  
ATOM   1484 3HD2 LEU C  92      42.580  55.871  35.299  1.00  0.00           H  
ATOM   1485  C   LEU C  92      38.504  54.017  36.319  1.00  0.00           C  
ATOM   1486  O   LEU C  92      37.553  54.163  37.084  1.00  0.00           O  
ATOM   1487  N   LEU C  93      39.001  52.818  36.004  1.00  0.00           N  
ATOM   1488  H   LEU C  93      39.773  52.781  35.360  1.00  0.00           H  
ATOM   1489  CA  LEU C  93      38.475  51.539  36.488  1.00  0.00           C  
ATOM   1490  HA  LEU C  93      37.729  51.727  37.262  1.00  0.00           H  
ATOM   1491  CB  LEU C  93      37.760  50.838  35.316  1.00  0.00           C  
ATOM   1492  HB2 LEU C  93      36.925  51.473  35.011  1.00  0.00           H  
ATOM   1493  HB3 LEU C  93      38.448  50.772  34.473  1.00  0.00           H  
ATOM   1494  CG  LEU C  93      37.217  49.424  35.600  1.00  0.00           C  
ATOM   1495  HG  LEU C  93      38.055  48.740  35.717  1.00  0.00           H  
ATOM   1496  CD1 LEU C  93      36.345  49.321  36.852  1.00  0.00           C  
ATOM   1497 1HD1 LEU C  93      35.480  49.975  36.765  1.00  0.00           H  
ATOM   1498 2HD1 LEU C  93      35.996  48.294  36.964  1.00  0.00           H  
ATOM   1499 3HD1 LEU C  93      36.915  49.580  37.743  1.00  0.00           H  
ATOM   1500  CD2 LEU C  93      36.387  48.972  34.399  1.00  0.00           C  
ATOM   1501 1HD2 LEU C  93      36.977  49.045  33.486  1.00  0.00           H  
ATOM   1502 2HD2 LEU C  93      36.076  47.938  34.539  1.00  0.00           H  
ATOM   1503 3HD2 LEU C  93      35.500  49.597  34.294  1.00  0.00           H  
ATOM   1504  C   LEU C  93      39.618  50.742  37.132  1.00  0.00           C  
ATOM   1505  O   LEU C  93      40.349  50.011  36.461  1.00  0.00           O  
ATOM   1506  N   ALA C  94      39.789  50.949  38.438  1.00  0.00           N  
ATOM   1507  H   ALA C  94      39.134  51.557  38.912  1.00  0.00           H  
ATOM   1508  CA  ALA C  94      40.804  50.324  39.281  1.00  0.00           C  
ATOM   1509  HA  ALA C  94      41.389  49.629  38.682  1.00  0.00           H  
ATOM   1510  CB  ALA C  94      41.750  51.407  39.814  1.00  0.00           C  
ATOM   1511  HB1 ALA C  94      41.195  52.118  40.425  1.00  0.00           H  
ATOM   1512  HB2 ALA C  94      42.529  50.949  40.424  1.00  0.00           H  
ATOM   1513  HB3 ALA C  94      42.215  51.941  38.985  1.00  0.00           H  
ATOM   1514  C   ALA C  94      40.147  49.524  40.416  1.00  0.00           C  
ATOM   1515  O   ALA C  94      39.104  49.918  40.938  1.00  0.00           O  
ATOM   1516  N   MET C  95      40.759  48.405  40.797  1.00  0.00           N  
ATOM   1517  H   MET C  95      41.632  48.155  40.341  1.00  0.00           H  
ATOM   1518  CA  MET C  95      40.221  47.432  41.753  1.00  0.00           C  
ATOM   1519  HA  MET C  95      39.619  47.965  42.487  1.00  0.00           H  
ATOM   1520  CB  MET C  95      39.299  46.453  41.000  1.00  0.00           C  
ATOM   1521  HB2 MET C  95      38.776  45.814  41.713  1.00  0.00           H  
ATOM   1522  HB3 MET C  95      38.543  47.035  40.474  1.00  0.00           H  
ATOM   1523  CG  MET C  95      40.037  45.558  39.990  1.00  0.00           C  
ATOM   1524  HG2 MET C  95      40.959  46.042  39.672  1.00  0.00           H  
ATOM   1525  HG3 MET C  95      40.312  44.632  40.496  1.00  0.00           H  
ATOM   1526  SD  MET C  95      39.085  45.153  38.500  1.00  0.00           S  
ATOM   1527  CE  MET C  95      39.244  46.717  37.592  1.00  0.00           C  
ATOM   1528  HE1 MET C  95      40.299  46.950  37.442  1.00  0.00           H  
ATOM   1529  HE2 MET C  95      38.756  46.624  36.622  1.00  0.00           H  
ATOM   1530  HE3 MET C  95      38.772  47.523  38.154  1.00  0.00           H  
ATOM   1531  C   MET C  95      41.335  46.708  42.526  1.00  0.00           C  
ATOM   1532  O   MET C  95      42.520  46.840  42.207  1.00  0.00           O  
ATOM   1533  N   GLU C  96      40.970  45.954  43.565  1.00  0.00           N  
ATOM   1534  H   GLU C  96      39.989  45.934  43.823  1.00  0.00           H  
ATOM   1535  CA  GLU C  96      41.940  45.189  44.362  1.00  0.00           C  
ATOM   1536  HA  GLU C  96      42.710  45.895  44.675  1.00  0.00           H  
ATOM   1537  CB  GLU C  96      41.298  44.648  45.658  1.00  0.00           C  
ATOM   1538  HB2 GLU C  96      42.096  44.307  46.318  1.00  0.00           H  
ATOM   1539  HB3 GLU C  96      40.781  45.470  46.155  1.00  0.00           H  
ATOM   1540  CG  GLU C  96      40.307  43.492  45.453  1.00  0.00           C  
ATOM   1541  HG2 GLU C  96      39.565  43.799  44.716  1.00  0.00           H  
ATOM   1542  HG3 GLU C  96      40.839  42.624  45.059  1.00  0.00           H  
ATOM   1543  CD  GLU C  96      39.591  43.095  46.753  1.00  0.00           C  
ATOM   1544  OE1 GLU C  96      40.214  42.578  47.709  1.00  0.00           O  
ATOM   1545  OE2 GLU C  96      38.351  43.246  46.836  1.00  0.00           O  
ATOM   1546  C   GLU C  96      42.661  44.097  43.541  1.00  0.00           C  
ATOM   1547  O   GLU C  96      42.100  43.531  42.597  1.00  0.00           O  
ATOM   1548  N   TYR C  97      43.916  43.805  43.902  1.00  0.00           N  
ATOM   1549  H   TYR C  97      44.319  44.284  44.693  1.00  0.00           H  
ATOM   1550  CA  TYR C  97      44.699  42.713  43.317  1.00  0.00           C  
ATOM   1551  HA  TYR C  97      44.341  42.534  42.305  1.00  0.00           H  
ATOM   1552  CB  TYR C  97      46.177  43.114  43.220  1.00  0.00           C  
ATOM   1553  HB2 TYR C  97      46.262  43.991  42.577  1.00  0.00           H  
ATOM   1554  HB3 TYR C  97      46.528  43.396  44.214  1.00  0.00           H  
ATOM   1555  CG  TYR C  97      47.083  42.026  42.663  1.00  0.00           C  
ATOM   1556  CD1 TYR C  97      46.877  41.541  41.357  1.00  0.00           C  
ATOM   1557  HD1 TYR C  97      46.071  41.938  40.752  1.00  0.00           H  
ATOM   1558  CE1 TYR C  97      47.718  40.545  40.827  1.00  0.00           C  
ATOM   1559  HE1 TYR C  97      47.557  40.181  39.824  1.00  0.00           H  
ATOM   1560  CZ  TYR C  97      48.773  40.024  41.606  1.00  0.00           C  
ATOM   1561  OH  TYR C  97      49.594  39.073  41.084  1.00  0.00           O  
ATOM   1562  HH  TYR C  97      49.949  39.356  40.239  1.00  0.00           H  
ATOM   1563  CE2 TYR C  97      48.973  40.498  42.920  1.00  0.00           C  
ATOM   1564  HE2 TYR C  97      49.779  40.087  43.510  1.00  0.00           H  
ATOM   1565  CD2 TYR C  97      48.126  41.493  43.449  1.00  0.00           C  
ATOM   1566  HD2 TYR C  97      48.275  41.846  44.461  1.00  0.00           H  
ATOM   1567  C   TYR C  97      44.530  41.415  44.120  1.00  0.00           C  
ATOM   1568  O   TYR C  97      44.633  41.432  45.348  1.00  0.00           O  
ATOM   1569  N   CYS C  98      44.318  40.298  43.425  1.00  0.00           N  
ATOM   1570  H   CYS C  98      44.252  40.388  42.417  1.00  0.00           H  
ATOM   1571  CA  CYS C  98      44.109  38.961  43.976  1.00  0.00           C  
ATOM   1572  HA  CYS C  98      44.039  39.022  45.058  1.00  0.00           H  
ATOM   1573  CB  CYS C  98      42.767  38.431  43.456  1.00  0.00           C  
ATOM   1574  HB2 CYS C  98      42.735  38.541  42.370  1.00  0.00           H  
ATOM   1575  HB3 CYS C  98      42.665  37.375  43.705  1.00  0.00           H  
ATOM   1576  SG  CYS C  98      41.405  39.362  44.228  1.00  0.00           S  
ATOM   1577  HG  CYS C  98      40.440  38.915  43.417  1.00  0.00           H  
ATOM   1578  C   CYS C  98      45.301  38.053  43.633  1.00  0.00           C  
ATOM   1579  O   CYS C  98      45.494  37.653  42.483  1.00  0.00           O  
ATOM   1580  N   SER C  99      46.125  37.746  44.637  1.00  0.00           N  
ATOM   1581  H   SER C  99      45.870  38.047  45.574  1.00  0.00           H  
ATOM   1582  CA  SER C  99      47.476  37.182  44.468  1.00  0.00           C  
ATOM   1583  HA  SER C  99      48.017  37.807  43.756  1.00  0.00           H  
ATOM   1584  CB  SER C  99      48.207  37.258  45.814  1.00  0.00           C  
ATOM   1585  HB2 SER C  99      49.195  36.802  45.723  1.00  0.00           H  
ATOM   1586  HB3 SER C  99      48.326  38.306  46.091  1.00  0.00           H  
ATOM   1587  OG  SER C  99      47.454  36.591  46.816  1.00  0.00           O  
ATOM   1588  HG  SER C  99      47.783  36.833  47.695  1.00  0.00           H  
ATOM   1589  C   SER C  99      47.544  35.747  43.924  1.00  0.00           C  
ATOM   1590  O   SER C  99      48.589  35.336  43.415  1.00  0.00           O  
ATOM   1591  N   GLY C 100      46.455  34.979  44.002  1.00  0.00           N  
ATOM   1592  H   GLY C 100      45.609  35.390  44.378  1.00  0.00           H  
ATOM   1593  CA  GLY C 100      46.363  33.602  43.506  1.00  0.00           C  
ATOM   1594  HA2 GLY C 100      47.316  33.092  43.656  1.00  0.00           H  
ATOM   1595  HA3 GLY C 100      45.608  33.079  44.090  1.00  0.00           H  
ATOM   1596  C   GLY C 100      45.976  33.474  42.025  1.00  0.00           C  
ATOM   1597  O   GLY C 100      46.162  32.401  41.452  1.00  0.00           O  
ATOM   1598  N   GLY C 101      45.480  34.543  41.393  1.00  0.00           N  
ATOM   1599  H   GLY C 101      45.359  35.398  41.921  1.00  0.00           H  
ATOM   1600  CA  GLY C 101      45.019  34.521  40.000  1.00  0.00           C  
ATOM   1601  HA2 GLY C 101      44.830  35.541  39.678  1.00  0.00           H  
ATOM   1602  HA3 GLY C 101      45.795  34.093  39.366  1.00  0.00           H  
ATOM   1603  C   GLY C 101      43.719  33.746  39.772  1.00  0.00           C  
ATOM   1604  O   GLY C 101      43.002  33.421  40.714  1.00  0.00           O  
ATOM   1605  N   ASP C 102      43.366  33.508  38.510  1.00  0.00           N  
ATOM   1606  H   ASP C 102      43.986  33.780  37.753  1.00  0.00           H  
ATOM   1607  CA  ASP C 102      42.074  32.930  38.122  1.00  0.00           C  
ATOM   1608  HA  ASP C 102      41.301  33.393  38.731  1.00  0.00           H  
ATOM   1609  CB  ASP C 102      41.755  33.261  36.661  1.00  0.00           C  
ATOM   1610  HB2 ASP C 102      40.846  32.742  36.353  1.00  0.00           H  
ATOM   1611  HB3 ASP C 102      41.561  34.331  36.594  1.00  0.00           H  
ATOM   1612  CG  ASP C 102      42.907  32.901  35.724  1.00  0.00           C  
ATOM   1613  OD1 ASP C 102      42.805  31.873  35.017  1.00  0.00           O  
ATOM   1614  OD2 ASP C 102      43.910  33.654  35.698  1.00  0.00           O  
ATOM   1615  C   ASP C 102      41.974  31.414  38.342  1.00  0.00           C  
ATOM   1616  O   ASP C 102      42.946  30.659  38.230  1.00  0.00           O  
ATOM   1617  N   LEU C 103      40.745  30.947  38.572  1.00  0.00           N  
ATOM   1618  H   LEU C 103      39.980  31.614  38.618  1.00  0.00           H  
ATOM   1619  CA  LEU C 103      40.449  29.526  38.752  1.00  0.00           C  
ATOM   1620  HA  LEU C 103      41.100  29.148  39.543  1.00  0.00           H  
ATOM   1621  CB  LEU C 103      38.987  29.410  39.208  1.00  0.00           C  
ATOM   1622  HB2 LEU C 103      38.846  30.073  40.058  1.00  0.00           H  
ATOM   1623  HB3 LEU C 103      38.352  29.768  38.402  1.00  0.00           H  
ATOM   1624  CG  LEU C 103      38.531  27.995  39.606  1.00  0.00           C  
ATOM   1625  HG  LEU C 103      38.795  27.284  38.826  1.00  0.00           H  
ATOM   1626  CD1 LEU C 103      39.168  27.557  40.924  1.00  0.00           C  
ATOM   1627 1HD1 LEU C 103      38.922  28.268  41.714  1.00  0.00           H  
ATOM   1628 2HD1 LEU C 103      38.793  26.573  41.201  1.00  0.00           H  
ATOM   1629 3HD1 LEU C 103      40.249  27.501  40.812  1.00  0.00           H  
ATOM   1630  CD2 LEU C 103      37.012  27.962  39.771  1.00  0.00           C  
ATOM   1631 1HD2 LEU C 103      36.531  28.254  38.840  1.00  0.00           H  
ATOM   1632 2HD2 LEU C 103      36.694  26.954  40.022  1.00  0.00           H  
ATOM   1633 3HD2 LEU C 103      36.698  28.643  40.561  1.00  0.00           H  
ATOM   1634  C   LEU C 103      40.734  28.700  37.484  1.00  0.00           C  
ATOM   1635  O   LEU C 103      41.121  27.534  37.588  1.00  0.00           O  
ATOM   1636  N   ARG C 104      40.606  29.283  36.282  1.00  0.00           N  
ATOM   1637  H   ARG C 104      40.290  30.249  36.252  1.00  0.00           H  
ATOM   1638  CA  ARG C 104      40.932  28.577  35.029  1.00  0.00           C  
ATOM   1639  HA  ARG C 104      40.395  27.631  35.049  1.00  0.00           H  
ATOM   1640  CB  ARG C 104      40.464  29.381  33.804  1.00  0.00           C  
ATOM   1641  HB2 ARG C 104      39.412  29.634  33.923  1.00  0.00           H  
ATOM   1642  HB3 ARG C 104      41.025  30.317  33.757  1.00  0.00           H  
ATOM   1643  CG  ARG C 104      40.648  28.632  32.467  1.00  0.00           C  
ATOM   1644  HG2 ARG C 104      40.327  29.285  31.654  1.00  0.00           H  
ATOM   1645  HG3 ARG C 104      41.709  28.434  32.313  1.00  0.00           H  
ATOM   1646  CD  ARG C 104      39.884  27.301  32.351  1.00  0.00           C  
ATOM   1647  HD2 ARG C 104      40.169  26.824  31.411  1.00  0.00           H  
ATOM   1648  HD3 ARG C 104      40.173  26.636  33.166  1.00  0.00           H  
ATOM   1649  NE  ARG C 104      38.425  27.506  32.352  1.00  0.00           N  
ATOM   1650  HE  ARG C 104      38.075  28.462  32.347  1.00  0.00           H  
ATOM   1651  CZ  ARG C 104      37.466  26.604  32.314  1.00  0.00           C  
ATOM   1652  NH1 ARG C 104      37.689  25.322  32.334  1.00  0.00           N  
ATOM   1653 1HH1 ARG C 104      38.618  24.961  32.365  1.00  0.00           H  
ATOM   1654 2HH1 ARG C 104      36.898  24.669  32.299  1.00  0.00           H  
ATOM   1655  NH2 ARG C 104      36.240  27.015  32.257  1.00  0.00           N  
ATOM   1656 1HH2 ARG C 104      36.077  28.017  32.197  1.00  0.00           H  
ATOM   1657 2HH2 ARG C 104      35.486  26.318  32.268  1.00  0.00           H  
ATOM   1658  C   ARG C 104      42.419  28.215  34.948  1.00  0.00           C  
ATOM   1659  O   ARG C 104      42.730  27.106  34.518  1.00  0.00           O  
ATOM   1660  N   LYS C 105      43.330  29.082  35.404  1.00  0.00           N  
ATOM   1661  H   LYS C 105      43.016  30.025  35.637  1.00  0.00           H  
ATOM   1662  CA  LYS C 105      44.768  28.778  35.522  1.00  0.00           C  
ATOM   1663  HA  LYS C 105      45.122  28.417  34.557  1.00  0.00           H  
ATOM   1664  CB  LYS C 105      45.525  30.077  35.844  1.00  0.00           C  
ATOM   1665  HB2 LYS C 105      45.254  30.809  35.086  1.00  0.00           H  
ATOM   1666  HB3 LYS C 105      45.211  30.463  36.814  1.00  0.00           H  
ATOM   1667  CG  LYS C 105      47.054  29.913  35.833  1.00  0.00           C  
ATOM   1668  HG2 LYS C 105      47.371  29.452  36.770  1.00  0.00           H  
ATOM   1669  HG3 LYS C 105      47.349  29.267  35.005  1.00  0.00           H  
ATOM   1670  CD  LYS C 105      47.744  31.275  35.661  1.00  0.00           C  
ATOM   1671  HD2 LYS C 105      47.527  31.653  34.659  1.00  0.00           H  
ATOM   1672  HD3 LYS C 105      47.349  31.980  36.396  1.00  0.00           H  
ATOM   1673  CE  LYS C 105      49.260  31.142  35.848  1.00  0.00           C  
ATOM   1674  HE2 LYS C 105      49.460  30.924  36.900  1.00  0.00           H  
ATOM   1675  HE3 LYS C 105      49.625  30.301  35.251  1.00  0.00           H  
ATOM   1676  NZ  LYS C 105      49.977  32.375  35.445  1.00  0.00           N  
ATOM   1677  HZ1 LYS C 105      49.451  32.920  34.781  1.00  0.00           H  
ATOM   1678  HZ2 LYS C 105      50.155  32.972  36.253  1.00  0.00           H  
ATOM   1679  HZ3 LYS C 105      50.894  32.157  35.051  1.00  0.00           H  
ATOM   1680  C   LYS C 105      45.052  27.659  36.528  1.00  0.00           C  
ATOM   1681  O   LYS C 105      45.925  26.834  36.265  1.00  0.00           O  
ATOM   1682  N   LEU C 106      44.282  27.560  37.616  1.00  0.00           N  
ATOM   1683  H   LEU C 106      43.600  28.290  37.786  1.00  0.00           H  
ATOM   1684  CA  LEU C 106      44.380  26.437  38.560  1.00  0.00           C  
ATOM   1685  HA  LEU C 106      45.434  26.319  38.811  1.00  0.00           H  
ATOM   1686  CB  LEU C 106      43.608  26.773  39.852  1.00  0.00           C  
ATOM   1687  HB2 LEU C 106      43.938  27.746  40.220  1.00  0.00           H  
ATOM   1688  HB3 LEU C 106      42.548  26.849  39.617  1.00  0.00           H  
ATOM   1689  CG  LEU C 106      43.783  25.732  40.977  1.00  0.00           C  
ATOM   1690  HG  LEU C 106      43.514  24.745  40.605  1.00  0.00           H  
ATOM   1691  CD1 LEU C 106      45.218  25.692  41.509  1.00  0.00           C  
ATOM   1692 1HD1 LEU C 106      45.519  26.683  41.854  1.00  0.00           H  
ATOM   1693 2HD1 LEU C 106      45.283  24.994  42.344  1.00  0.00           H  
ATOM   1694 3HD1 LEU C 106      45.903  25.358  40.733  1.00  0.00           H  
ATOM   1695  CD2 LEU C 106      42.857  26.061  42.145  1.00  0.00           C  
ATOM   1696 1HD2 LEU C 106      41.820  26.035  41.811  1.00  0.00           H  
ATOM   1697 2HD2 LEU C 106      42.978  25.316  42.934  1.00  0.00           H  
ATOM   1698 3HD2 LEU C 106      43.091  27.050  42.540  1.00  0.00           H  
ATOM   1699  C   LEU C 106      43.918  25.110  37.928  1.00  0.00           C  
ATOM   1700  O   LEU C 106      44.627  24.111  38.051  1.00  0.00           O  
ATOM   1701  N   LEU C 107      42.792  25.104  37.204  1.00  0.00           N  
ATOM   1702  H   LEU C 107      42.246  25.961  37.182  1.00  0.00           H  
ATOM   1703  CA  LEU C 107      42.272  23.936  36.464  1.00  0.00           C  
ATOM   1704  HA  LEU C 107      42.234  23.077  37.137  1.00  0.00           H  
ATOM   1705  CB  LEU C 107      40.843  24.248  35.972  1.00  0.00           C  
ATOM   1706  HB2 LEU C 107      40.878  25.176  35.400  1.00  0.00           H  
ATOM   1707  HB3 LEU C 107      40.524  23.456  35.292  1.00  0.00           H  
ATOM   1708  CG  LEU C 107      39.775  24.383  37.078  1.00  0.00           C  
ATOM   1709  HG  LEU C 107      40.133  25.053  37.858  1.00  0.00           H  
ATOM   1710  CD1 LEU C 107      38.492  24.973  36.487  1.00  0.00           C  
ATOM   1711 1HD1 LEU C 107      38.093  24.311  35.717  1.00  0.00           H  
ATOM   1712 2HD1 LEU C 107      37.746  25.089  37.276  1.00  0.00           H  
ATOM   1713 3HD1 LEU C 107      38.703  25.950  36.056  1.00  0.00           H  
ATOM   1714  CD2 LEU C 107      39.422  23.037  37.714  1.00  0.00           C  
ATOM   1715 1HD2 LEU C 107      40.304  22.588  38.169  1.00  0.00           H  
ATOM   1716 2HD2 LEU C 107      38.669  23.186  38.486  1.00  0.00           H  
ATOM   1717 3HD2 LEU C 107      39.026  22.354  36.960  1.00  0.00           H  
ATOM   1718  C   LEU C 107      43.168  23.516  35.276  1.00  0.00           C  
ATOM   1719  O   LEU C 107      43.094  22.380  34.811  1.00  0.00           O  
ATOM   1720  N   ASN C 108      44.036  24.411  34.792  1.00  0.00           N  
ATOM   1721  H   ASN C 108      43.980  25.353  35.154  1.00  0.00           H  
ATOM   1722  CA  ASN C 108      45.036  24.131  33.752  1.00  0.00           C  
ATOM   1723  HA  ASN C 108      44.615  23.388  33.074  1.00  0.00           H  
ATOM   1724  CB  ASN C 108      45.315  25.419  32.941  1.00  0.00           C  
ATOM   1725  HB2 ASN C 108      44.895  26.282  33.453  1.00  0.00           H  
ATOM   1726  HB3 ASN C 108      46.389  25.588  32.873  1.00  0.00           H  
ATOM   1727  CG  ASN C 108      44.783  25.373  31.516  1.00  0.00           C  
ATOM   1728  OD1 ASN C 108      44.860  24.378  30.813  1.00  0.00           O  
ATOM   1729  ND2 ASN C 108      44.245  26.463  31.020  1.00  0.00           N  
ATOM   1730 1HD2 ASN C 108      43.932  26.421  30.063  1.00  0.00           H  
ATOM   1731 2HD2 ASN C 108      44.195  27.299  31.570  1.00  0.00           H  
ATOM   1732  C   ASN C 108      46.339  23.492  34.285  1.00  0.00           C  
ATOM   1733  O   ASN C 108      47.220  23.173  33.484  1.00  0.00           O  
ATOM   1734  N   LYS C 109      46.503  23.305  35.606  1.00  0.00           N  
ATOM   1735  H   LYS C 109      45.751  23.578  36.229  1.00  0.00           H  
ATOM   1736  CA  LYS C 109      47.661  22.583  36.165  1.00  0.00           C  
ATOM   1737  HA  LYS C 109      48.541  22.909  35.615  1.00  0.00           H  
ATOM   1738  CB  LYS C 109      47.882  22.907  37.651  1.00  0.00           C  
ATOM   1739  HB2 LYS C 109      46.943  22.803  38.194  1.00  0.00           H  
ATOM   1740  HB3 LYS C 109      48.582  22.173  38.054  1.00  0.00           H  
ATOM   1741  CG  LYS C 109      48.471  24.306  37.884  1.00  0.00           C  
ATOM   1742  HG2 LYS C 109      49.325  24.449  37.220  1.00  0.00           H  
ATOM   1743  HG3 LYS C 109      47.718  25.065  37.663  1.00  0.00           H  
ATOM   1744  CD  LYS C 109      48.944  24.443  39.338  1.00  0.00           C  
ATOM   1745  HD2 LYS C 109      48.087  24.358  40.009  1.00  0.00           H  
ATOM   1746  HD3 LYS C 109      49.645  23.636  39.564  1.00  0.00           H  
ATOM   1747  CE  LYS C 109      49.646  25.787  39.565  1.00  0.00           C  
ATOM   1748  HE2 LYS C 109      50.456  25.891  38.840  1.00  0.00           H  
ATOM   1749  HE3 LYS C 109      48.927  26.595  39.398  1.00  0.00           H  
ATOM   1750  NZ  LYS C 109      50.191  25.875  40.938  1.00  0.00           N  
ATOM   1751  HZ1 LYS C 109      50.874  25.142  41.124  1.00  0.00           H  
ATOM   1752  HZ2 LYS C 109      50.636  26.773  41.119  1.00  0.00           H  
ATOM   1753  HZ3 LYS C 109      49.452  25.760  41.629  1.00  0.00           H  
ATOM   1754  C   LYS C 109      47.507  21.061  35.985  1.00  0.00           C  
ATOM   1755  O   LYS C 109      46.416  20.554  36.248  1.00  0.00           O  
ATOM   1756  N   PRO C 110      48.582  20.309  35.662  1.00  0.00           N  
ATOM   1757  CD  PRO C 110      49.910  20.801  35.305  1.00  0.00           C  
ATOM   1758  HD2 PRO C 110      50.463  21.046  36.212  1.00  0.00           H  
ATOM   1759  HD3 PRO C 110      49.860  21.666  34.643  1.00  0.00           H  
ATOM   1760  CG  PRO C 110      50.600  19.655  34.567  1.00  0.00           C  
ATOM   1761  HG2 PRO C 110      51.681  19.675  34.707  1.00  0.00           H  
ATOM   1762  HG3 PRO C 110      50.348  19.697  33.505  1.00  0.00           H  
ATOM   1763  CB  PRO C 110      49.965  18.420  35.200  1.00  0.00           C  
ATOM   1764  HB2 PRO C 110      50.447  18.210  36.155  1.00  0.00           H  
ATOM   1765  HB3 PRO C 110      50.025  17.552  34.542  1.00  0.00           H  
ATOM   1766  CA  PRO C 110      48.515  18.862  35.420  1.00  0.00           C  
ATOM   1767  HA  PRO C 110      47.969  18.702  34.492  1.00  0.00           H  
ATOM   1768  C   PRO C 110      47.837  18.030  36.520  1.00  0.00           C  
ATOM   1769  O   PRO C 110      47.110  17.093  36.206  1.00  0.00           O  
ATOM   1770  N   GLU C 111      48.016  18.377  37.801  1.00  0.00           N  
ATOM   1771  H   GLU C 111      48.619  19.154  38.020  1.00  0.00           H  
ATOM   1772  CA  GLU C 111      47.391  17.642  38.916  1.00  0.00           C  
ATOM   1773  HA  GLU C 111      47.386  16.586  38.645  1.00  0.00           H  
ATOM   1774  CB  GLU C 111      48.256  17.748  40.185  1.00  0.00           C  
ATOM   1775  HB2 GLU C 111      47.868  17.046  40.923  1.00  0.00           H  
ATOM   1776  HB3 GLU C 111      49.272  17.436  39.935  1.00  0.00           H  
ATOM   1777  CG  GLU C 111      48.316  19.140  40.829  1.00  0.00           C  
ATOM   1778  HG2 GLU C 111      48.651  19.866  40.083  1.00  0.00           H  
ATOM   1779  HG3 GLU C 111      47.318  19.431  41.159  1.00  0.00           H  
ATOM   1780  CD  GLU C 111      49.274  19.142  42.031  1.00  0.00           C  
ATOM   1781  OE1 GLU C 111      50.272  19.899  42.000  1.00  0.00           O  
ATOM   1782  OE2 GLU C 111      49.048  18.375  43.000  1.00  0.00           O  
ATOM   1783  C   GLU C 111      45.910  17.994  39.164  1.00  0.00           C  
ATOM   1784  O   GLU C 111      45.246  17.310  39.943  1.00  0.00           O  
ATOM   1785  N   ASN C 112      45.379  19.013  38.474  1.00  0.00           N  
ATOM   1786  H   ASN C 112      45.980  19.500  37.820  1.00  0.00           H  
ATOM   1787  CA  ASN C 112      43.992  19.482  38.562  1.00  0.00           C  
ATOM   1788  HA  ASN C 112      43.480  18.955  39.369  1.00  0.00           H  
ATOM   1789  CB  ASN C 112      43.993  20.980  38.907  1.00  0.00           C  
ATOM   1790  HB2 ASN C 112      44.514  21.514  38.113  1.00  0.00           H  
ATOM   1791  HB3 ASN C 112      42.969  21.347  38.936  1.00  0.00           H  
ATOM   1792  CG  ASN C 112      44.640  21.309  40.239  1.00  0.00           C  
ATOM   1793  OD1 ASN C 112      44.625  20.552  41.194  1.00  0.00           O  
ATOM   1794  ND2 ASN C 112      45.227  22.474  40.349  1.00  0.00           N  
ATOM   1795 1HD2 ASN C 112      45.621  22.695  41.245  1.00  0.00           H  
ATOM   1796 2HD2 ASN C 112      45.164  23.125  39.577  1.00  0.00           H  
ATOM   1797  C   ASN C 112      43.177  19.216  37.278  1.00  0.00           C  
ATOM   1798  O   ASN C 112      41.989  19.528  37.240  1.00  0.00           O  
ATOM   1799  N   CYS C 113      43.774  18.619  36.235  1.00  0.00           N  
ATOM   1800  H   CYS C 113      44.767  18.437  36.291  1.00  0.00           H  
ATOM   1801  CA  CYS C 113      43.100  18.347  34.956  1.00  0.00           C  
ATOM   1802  HA  CYS C 113      42.770  19.293  34.523  1.00  0.00           H  
ATOM   1803  CB  CYS C 113      44.095  17.673  33.998  1.00  0.00           C  
ATOM   1804  HB2 CYS C 113      44.527  16.790  34.475  1.00  0.00           H  
ATOM   1805  HB3 CYS C 113      43.560  17.354  33.100  1.00  0.00           H  
ATOM   1806  SG  CYS C 113      45.420  18.813  33.511  1.00  0.00           S  
ATOM   1807  HG  CYS C 113      46.076  17.945  32.728  1.00  0.00           H  
ATOM   1808  C   CYS C 113      41.846  17.460  35.075  1.00  0.00           C  
ATOM   1809  O   CYS C 113      40.981  17.519  34.207  1.00  0.00           O  
ATOM   1810  N   CYS C 114      41.741  16.656  36.137  1.00  0.00           N  
ATOM   1811  H   CYS C 114      42.502  16.654  36.796  1.00  0.00           H  
ATOM   1812  CA  CYS C 114      40.593  15.786  36.417  1.00  0.00           C  
ATOM   1813  HA  CYS C 114      40.003  15.670  35.505  1.00  0.00           H  
ATOM   1814  CB  CYS C 114      41.100  14.394  36.830  1.00  0.00           C  
ATOM   1815  HB2 CYS C 114      41.610  14.464  37.791  1.00  0.00           H  
ATOM   1816  HB3 CYS C 114      40.237  13.734  36.946  1.00  0.00           H  
ATOM   1817  SG  CYS C 114      42.227  13.691  35.585  1.00  0.00           S  
ATOM   1818  HG  CYS C 114      42.304  12.466  36.114  1.00  0.00           H  
ATOM   1819  C   CYS C 114      39.629  16.373  37.473  1.00  0.00           C  
ATOM   1820  O   CYS C 114      38.761  15.655  37.963  1.00  0.00           O  
ATOM   1821  N   GLY C 115      39.808  17.642  37.860  1.00  0.00           N  
ATOM   1822  H   GLY C 115      40.554  18.175  37.426  1.00  0.00           H  
ATOM   1823  CA  GLY C 115      39.093  18.297  38.956  1.00  0.00           C  
ATOM   1824  HA2 GLY C 115      38.679  19.236  38.588  1.00  0.00           H  
ATOM   1825  HA3 GLY C 115      38.257  17.680  39.289  1.00  0.00           H  
ATOM   1826  C   GLY C 115      39.971  18.608  40.177  1.00  0.00           C  
ATOM   1827  O   GLY C 115      41.157  18.266  40.246  1.00  0.00           O  
ATOM   1828  N   LEU C 116      39.364  19.293  41.145  1.00  0.00           N  
ATOM   1829  H   LEU C 116      38.367  19.444  41.037  1.00  0.00           H  
ATOM   1830  CA  LEU C 116      39.976  19.792  42.378  1.00  0.00           C  
ATOM   1831  HA  LEU C 116      41.058  19.837  42.248  1.00  0.00           H  
ATOM   1832  CB  LEU C 116      39.454  21.218  42.660  1.00  0.00           C  
ATOM   1833  HB2 LEU C 116      38.384  21.157  42.863  1.00  0.00           H  
ATOM   1834  HB3 LEU C 116      39.941  21.591  43.561  1.00  0.00           H  
ATOM   1835  CG  LEU C 116      39.674  22.250  41.539  1.00  0.00           C  
ATOM   1836  HG  LEU C 116      39.107  21.950  40.658  1.00  0.00           H  
ATOM   1837  CD1 LEU C 116      39.161  23.616  41.993  1.00  0.00           C  
ATOM   1838 1HD1 LEU C 116      39.756  23.977  42.833  1.00  0.00           H  
ATOM   1839 2HD1 LEU C 116      39.238  24.317  41.163  1.00  0.00           H  
ATOM   1840 3HD1 LEU C 116      38.117  23.539  42.292  1.00  0.00           H  
ATOM   1841  CD2 LEU C 116      41.145  22.406  41.151  1.00  0.00           C  
ATOM   1842 1HD2 LEU C 116      41.517  21.468  40.744  1.00  0.00           H  
ATOM   1843 2HD2 LEU C 116      41.250  23.182  40.395  1.00  0.00           H  
ATOM   1844 3HD2 LEU C 116      41.738  22.675  42.027  1.00  0.00           H  
ATOM   1845  C   LEU C 116      39.703  18.860  43.571  1.00  0.00           C  
ATOM   1846  O   LEU C 116      38.877  17.945  43.513  1.00  0.00           O  
ATOM   1847  N   LYS C 117      40.386  19.124  44.689  1.00  0.00           N  
ATOM   1848  H   LYS C 117      41.033  19.899  44.668  1.00  0.00           H  
ATOM   1849  CA  LYS C 117      40.179  18.412  45.960  1.00  0.00           C  
ATOM   1850  HA  LYS C 117      40.030  17.354  45.732  1.00  0.00           H  
ATOM   1851  CB  LYS C 117      41.420  18.524  46.866  1.00  0.00           C  
ATOM   1852  HB2 LYS C 117      41.470  19.527  47.291  1.00  0.00           H  
ATOM   1853  HB3 LYS C 117      41.313  17.808  47.683  1.00  0.00           H  
ATOM   1854  CG  LYS C 117      42.730  18.242  46.112  1.00  0.00           C  
ATOM   1855  HG2 LYS C 117      42.597  17.369  45.470  1.00  0.00           H  
ATOM   1856  HG3 LYS C 117      42.968  19.103  45.485  1.00  0.00           H  
ATOM   1857  CD  LYS C 117      43.909  17.969  47.056  1.00  0.00           C  
ATOM   1858  HD2 LYS C 117      43.971  18.739  47.825  1.00  0.00           H  
ATOM   1859  HD3 LYS C 117      43.757  16.997  47.529  1.00  0.00           H  
ATOM   1860  CE  LYS C 117      45.200  17.967  46.230  1.00  0.00           C  
ATOM   1861  HE2 LYS C 117      44.959  17.643  45.216  1.00  0.00           H  
ATOM   1862  HE3 LYS C 117      45.590  18.987  46.169  1.00  0.00           H  
ATOM   1863  NZ  LYS C 117      46.220  17.053  46.786  1.00  0.00           N  
ATOM   1864  HZ1 LYS C 117      45.855  16.103  46.818  1.00  0.00           H  
ATOM   1865  HZ2 LYS C 117      47.016  17.009  46.152  1.00  0.00           H  
ATOM   1866  HZ3 LYS C 117      46.529  17.336  47.713  1.00  0.00           H  
ATOM   1867  C   LYS C 117      38.912  18.896  46.670  1.00  0.00           C  
ATOM   1868  O   LYS C 117      38.522  20.059  46.548  1.00  0.00           O  
ATOM   1869  N   GLU C 118      38.310  18.029  47.480  1.00  0.00           N  
ATOM   1870  H   GLU C 118      38.697  17.090  47.529  1.00  0.00           H  
ATOM   1871  CA  GLU C 118      37.051  18.280  48.199  1.00  0.00           C  
ATOM   1872  HA  GLU C 118      36.238  18.353  47.475  1.00  0.00           H  
ATOM   1873  CB  GLU C 118      36.785  17.068  49.104  1.00  0.00           C  
ATOM   1874  HB2 GLU C 118      36.761  16.174  48.479  1.00  0.00           H  
ATOM   1875  HB3 GLU C 118      37.613  16.964  49.809  1.00  0.00           H  
ATOM   1876  CG  GLU C 118      35.473  17.131  49.897  1.00  0.00           C  
ATOM   1877  HG2 GLU C 118      35.492  17.988  50.572  1.00  0.00           H  
ATOM   1878  HG3 GLU C 118      34.634  17.246  49.210  1.00  0.00           H  
ATOM   1879  CD  GLU C 118      35.321  15.840  50.705  1.00  0.00           C  
ATOM   1880  OE1 GLU C 118      34.936  14.803  50.115  1.00  0.00           O  
ATOM   1881  OE2 GLU C 118      35.714  15.818  51.898  1.00  0.00           O  
ATOM   1882  C   GLU C 118      37.063  19.587  49.010  1.00  0.00           C  
ATOM   1883  O   GLU C 118      36.103  20.355  48.949  1.00  0.00           O  
ATOM   1884  N   SER C 119      38.164  19.903  49.701  1.00  0.00           N  
ATOM   1885  H   SER C 119      38.954  19.275  49.678  1.00  0.00           H  
ATOM   1886  CA  SER C 119      38.281  21.148  50.475  1.00  0.00           C  
ATOM   1887  HA  SER C 119      37.426  21.206  51.147  1.00  0.00           H  
ATOM   1888  CB  SER C 119      39.542  21.128  51.349  1.00  0.00           C  
ATOM   1889  HB2 SER C 119      39.618  22.071  51.893  1.00  0.00           H  
ATOM   1890  HB3 SER C 119      39.452  20.320  52.075  1.00  0.00           H  
ATOM   1891  OG  SER C 119      40.721  20.928  50.586  1.00  0.00           O  
ATOM   1892  HG  SER C 119      41.448  20.810  51.212  1.00  0.00           H  
ATOM   1893  C   SER C 119      38.236  22.412  49.606  1.00  0.00           C  
ATOM   1894  O   SER C 119      37.686  23.420  50.039  1.00  0.00           O  
ATOM   1895  N   GLN C 120      38.725  22.361  48.363  1.00  0.00           N  
ATOM   1896  H   GLN C 120      39.062  21.473  48.015  1.00  0.00           H  
ATOM   1897  CA  GLN C 120      38.665  23.493  47.428  1.00  0.00           C  
ATOM   1898  HA  GLN C 120      38.892  24.409  47.974  1.00  0.00           H  
ATOM   1899  CB  GLN C 120      39.723  23.319  46.327  1.00  0.00           C  
ATOM   1900  HB2 GLN C 120      39.551  22.380  45.801  1.00  0.00           H  
ATOM   1901  HB3 GLN C 120      39.621  24.138  45.612  1.00  0.00           H  
ATOM   1902  CG  GLN C 120      41.153  23.335  46.896  1.00  0.00           C  
ATOM   1903  HG2 GLN C 120      41.318  24.276  47.421  1.00  0.00           H  
ATOM   1904  HG3 GLN C 120      41.269  22.521  47.608  1.00  0.00           H  
ATOM   1905  CD  GLN C 120      42.235  23.179  45.831  1.00  0.00           C  
ATOM   1906  OE1 GLN C 120      41.980  22.990  44.655  1.00  0.00           O  
ATOM   1907  NE2 GLN C 120      43.492  23.245  46.206  1.00  0.00           N  
ATOM   1908 1HE2 GLN C 120      44.178  23.107  45.487  1.00  0.00           H  
ATOM   1909 2HE2 GLN C 120      43.733  23.350  47.186  1.00  0.00           H  
ATOM   1910  C   GLN C 120      37.259  23.663  46.831  1.00  0.00           C  
ATOM   1911  O   GLN C 120      36.806  24.790  46.630  1.00  0.00           O  
ATOM   1912  N   ILE C 121      36.535  22.559  46.618  1.00  0.00           N  
ATOM   1913  H   ILE C 121      36.975  21.663  46.796  1.00  0.00           H  
ATOM   1914  CA  ILE C 121      35.131  22.573  46.177  1.00  0.00           C  
ATOM   1915  HA  ILE C 121      35.042  23.248  45.326  1.00  0.00           H  
ATOM   1916  CB  ILE C 121      34.719  21.155  45.701  1.00  0.00           C  
ATOM   1917  HB  ILE C 121      34.908  20.449  46.511  1.00  0.00           H  
ATOM   1918  CG2 ILE C 121      33.218  21.103  45.355  1.00  0.00           C  
ATOM   1919 1HG2 ILE C 121      32.985  21.839  44.584  1.00  0.00           H  
ATOM   1920 2HG2 ILE C 121      32.941  20.113  44.993  1.00  0.00           H  
ATOM   1921 3HG2 ILE C 121      32.615  21.310  46.239  1.00  0.00           H  
ATOM   1922  CG1 ILE C 121      35.563  20.737  44.469  1.00  0.00           C  
ATOM   1923 2HG1 ILE C 121      35.232  21.300  43.595  1.00  0.00           H  
ATOM   1924 3HG1 ILE C 121      36.613  20.976  44.634  1.00  0.00           H  
ATOM   1925  CD1 ILE C 121      35.511  19.239  44.145  1.00  0.00           C  
ATOM   1926 1HD1 ILE C 121      34.499  18.937  43.889  1.00  0.00           H  
ATOM   1927 2HD1 ILE C 121      36.160  19.031  43.296  1.00  0.00           H  
ATOM   1928 3HD1 ILE C 121      35.862  18.662  45.001  1.00  0.00           H  
ATOM   1929  C   ILE C 121      34.228  23.141  47.289  1.00  0.00           C  
ATOM   1930  O   ILE C 121      33.384  23.999  47.023  1.00  0.00           O  
ATOM   1931  N   LEU C 122      34.458  22.759  48.551  1.00  0.00           N  
ATOM   1932  H   LEU C 122      35.140  22.022  48.712  1.00  0.00           H  
ATOM   1933  CA  LEU C 122      33.767  23.337  49.712  1.00  0.00           C  
ATOM   1934  HA  LEU C 122      32.695  23.324  49.515  1.00  0.00           H  
ATOM   1935  CB  LEU C 122      34.043  22.473  50.957  1.00  0.00           C  
ATOM   1936  HB2 LEU C 122      35.123  22.393  51.085  1.00  0.00           H  
ATOM   1937  HB3 LEU C 122      33.643  22.986  51.833  1.00  0.00           H  
ATOM   1938  CG  LEU C 122      33.437  21.053  50.912  1.00  0.00           C  
ATOM   1939  HG  LEU C 122      33.751  20.544  50.003  1.00  0.00           H  
ATOM   1940  CD1 LEU C 122      33.935  20.248  52.112  1.00  0.00           C  
ATOM   1941 1HD1 LEU C 122      33.599  20.710  53.042  1.00  0.00           H  
ATOM   1942 2HD1 LEU C 122      33.544  19.232  52.062  1.00  0.00           H  
ATOM   1943 3HD1 LEU C 122      35.023  20.200  52.097  1.00  0.00           H  
ATOM   1944  CD2 LEU C 122      31.905  21.062  50.950  1.00  0.00           C  
ATOM   1945 1HD2 LEU C 122      31.506  21.550  50.063  1.00  0.00           H  
ATOM   1946 2HD2 LEU C 122      31.536  20.037  50.971  1.00  0.00           H  
ATOM   1947 3HD2 LEU C 122      31.555  21.579  51.844  1.00  0.00           H  
ATOM   1948  C   LEU C 122      34.132  24.819  49.948  1.00  0.00           C  
ATOM   1949  O   LEU C 122      33.266  25.595  50.360  1.00  0.00           O  
ATOM   1950  N   SER C 123      35.360  25.251  49.630  1.00  0.00           N  
ATOM   1951  H   SER C 123      36.085  24.569  49.431  1.00  0.00           H  
ATOM   1952  CA  SER C 123      35.716  26.681  49.594  1.00  0.00           C  
ATOM   1953  HA  SER C 123      35.450  27.130  50.551  1.00  0.00           H  
ATOM   1954  CB  SER C 123      37.219  26.893  49.382  1.00  0.00           C  
ATOM   1955  HB2 SER C 123      37.574  26.241  48.586  1.00  0.00           H  
ATOM   1956  HB3 SER C 123      37.400  27.930  49.092  1.00  0.00           H  
ATOM   1957  OG  SER C 123      37.943  26.634  50.566  1.00  0.00           O  
ATOM   1958  HG  SER C 123      37.917  27.425  51.116  1.00  0.00           H  
ATOM   1959  C   SER C 123      34.950  27.447  48.512  1.00  0.00           C  
ATOM   1960  O   SER C 123      34.425  28.516  48.807  1.00  0.00           O  
ATOM   1961  N   LEU C 124      34.799  26.909  47.295  1.00  0.00           N  
ATOM   1962  H   LEU C 124      35.260  26.027  47.090  1.00  0.00           H  
ATOM   1963  CA  LEU C 124      34.005  27.556  46.235  1.00  0.00           C  
ATOM   1964  HA  LEU C 124      34.385  28.567  46.087  1.00  0.00           H  
ATOM   1965  CB  LEU C 124      34.144  26.762  44.922  1.00  0.00           C  
ATOM   1966  HB2 LEU C 124      34.028  25.700  45.141  1.00  0.00           H  
ATOM   1967  HB3 LEU C 124      33.333  27.045  44.248  1.00  0.00           H  
ATOM   1968  CG  LEU C 124      35.481  26.985  44.191  1.00  0.00           C  
ATOM   1969  HG  LEU C 124      36.311  26.882  44.889  1.00  0.00           H  
ATOM   1970  CD1 LEU C 124      35.641  25.945  43.082  1.00  0.00           C  
ATOM   1971 1HD1 LEU C 124      34.814  26.022  42.376  1.00  0.00           H  
ATOM   1972 2HD1 LEU C 124      36.584  26.111  42.562  1.00  0.00           H  
ATOM   1973 3HD1 LEU C 124      35.657  24.947  43.521  1.00  0.00           H  
ATOM   1974  CD2 LEU C 124      35.539  28.370  43.539  1.00  0.00           C  
ATOM   1975 1HD2 LEU C 124      35.498  29.147  44.299  1.00  0.00           H  
ATOM   1976 2HD2 LEU C 124      36.484  28.482  43.008  1.00  0.00           H  
ATOM   1977 3HD2 LEU C 124      34.715  28.499  42.838  1.00  0.00           H  
ATOM   1978  C   LEU C 124      32.526  27.706  46.632  1.00  0.00           C  
ATOM   1979  O   LEU C 124      31.932  28.763  46.410  1.00  0.00           O  
ATOM   1980  N   LEU C 125      31.944  26.687  47.270  1.00  0.00           N  
ATOM   1981  H   LEU C 125      32.473  25.826  47.372  1.00  0.00           H  
ATOM   1982  CA  LEU C 125      30.579  26.740  47.814  1.00  0.00           C  
ATOM   1983  HA  LEU C 125      29.906  27.116  47.044  1.00  0.00           H  
ATOM   1984  CB  LEU C 125      30.144  25.313  48.189  1.00  0.00           C  
ATOM   1985  HB2 LEU C 125      30.915  24.875  48.826  1.00  0.00           H  
ATOM   1986  HB3 LEU C 125      29.220  25.356  48.769  1.00  0.00           H  
ATOM   1987  CG  LEU C 125      29.919  24.407  46.961  1.00  0.00           C  
ATOM   1988  HG  LEU C 125      30.704  24.574  46.224  1.00  0.00           H  
ATOM   1989  CD1 LEU C 125      29.960  22.937  47.372  1.00  0.00           C  
ATOM   1990 1HD1 LEU C 125      29.211  22.737  48.137  1.00  0.00           H  
ATOM   1991 2HD1 LEU C 125      29.761  22.321  46.496  1.00  0.00           H  
ATOM   1992 3HD1 LEU C 125      30.951  22.696  47.754  1.00  0.00           H  
ATOM   1993  CD2 LEU C 125      28.565  24.665  46.299  1.00  0.00           C  
ATOM   1994 1HD2 LEU C 125      28.465  25.712  46.019  1.00  0.00           H  
ATOM   1995 2HD2 LEU C 125      28.476  24.056  45.399  1.00  0.00           H  
ATOM   1996 3HD2 LEU C 125      27.757  24.395  46.977  1.00  0.00           H  
ATOM   1997  C   LEU C 125      30.455  27.714  49.003  1.00  0.00           C  
ATOM   1998  O   LEU C 125      29.403  28.322  49.179  1.00  0.00           O  
ATOM   1999  N   SER C 126      31.524  27.914  49.781  1.00  0.00           N  
ATOM   2000  H   SER C 126      32.356  27.370  49.593  1.00  0.00           H  
ATOM   2001  CA  SER C 126      31.559  28.895  50.878  1.00  0.00           C  
ATOM   2002  HA  SER C 126      30.628  28.825  51.441  1.00  0.00           H  
ATOM   2003  CB  SER C 126      32.712  28.592  51.847  1.00  0.00           C  
ATOM   2004  HB2 SER C 126      33.665  28.649  51.319  1.00  0.00           H  
ATOM   2005  HB3 SER C 126      32.712  29.340  52.640  1.00  0.00           H  
ATOM   2006  OG  SER C 126      32.569  27.307  52.428  1.00  0.00           O  
ATOM   2007  HG  SER C 126      32.732  26.651  51.721  1.00  0.00           H  
ATOM   2008  C   SER C 126      31.679  30.340  50.373  1.00  0.00           C  
ATOM   2009  O   SER C 126      30.881  31.192  50.758  1.00  0.00           O  
ATOM   2010  N   ASP C 127      32.646  30.619  49.495  1.00  0.00           N  
ATOM   2011  H   ASP C 127      33.269  29.864  49.223  1.00  0.00           H  
ATOM   2012  CA  ASP C 127      32.979  31.965  49.013  1.00  0.00           C  
ATOM   2013  HA  ASP C 127      32.812  32.686  49.816  1.00  0.00           H  
ATOM   2014  CB  ASP C 127      34.460  32.021  48.615  1.00  0.00           C  
ATOM   2015  HB2 ASP C 127      34.708  31.125  48.043  1.00  0.00           H  
ATOM   2016  HB3 ASP C 127      34.608  32.876  47.956  1.00  0.00           H  
ATOM   2017  CG  ASP C 127      35.433  32.168  49.781  1.00  0.00           C  
ATOM   2018  OD1 ASP C 127      35.067  32.815  50.789  1.00  0.00           O  
ATOM   2019  OD2 ASP C 127      36.588  31.737  49.592  1.00  0.00           O  
ATOM   2020  C   ASP C 127      32.120  32.422  47.833  1.00  0.00           C  
ATOM   2021  O   ASP C 127      31.387  33.404  47.938  1.00  0.00           O  
ATOM   2022  N   ILE C 128      32.163  31.710  46.702  1.00  0.00           N  
ATOM   2023  H   ILE C 128      32.700  30.852  46.685  1.00  0.00           H  
ATOM   2024  CA  ILE C 128      31.385  32.090  45.513  1.00  0.00           C  
ATOM   2025  HA  ILE C 128      31.499  33.163  45.363  1.00  0.00           H  
ATOM   2026  CB  ILE C 128      31.918  31.384  44.243  1.00  0.00           C  
ATOM   2027  HB  ILE C 128      31.801  30.308  44.369  1.00  0.00           H  
ATOM   2028  CG2 ILE C 128      31.099  31.786  43.002  1.00  0.00           C  
ATOM   2029 1HG2 ILE C 128      31.053  32.870  42.908  1.00  0.00           H  
ATOM   2030 2HG2 ILE C 128      31.552  31.365  42.106  1.00  0.00           H  
ATOM   2031 3HG2 ILE C 128      30.083  31.397  43.083  1.00  0.00           H  
ATOM   2032  CG1 ILE C 128      33.423  31.660  43.995  1.00  0.00           C  
ATOM   2033 2HG1 ILE C 128      34.004  31.230  44.813  1.00  0.00           H  
ATOM   2034 3HG1 ILE C 128      33.728  31.140  43.086  1.00  0.00           H  
ATOM   2035  CD1 ILE C 128      33.813  33.141  43.856  1.00  0.00           C  
ATOM   2036 1HD1 ILE C 128      33.616  33.679  44.783  1.00  0.00           H  
ATOM   2037 2HD1 ILE C 128      34.874  33.220  43.632  1.00  0.00           H  
ATOM   2038 3HD1 ILE C 128      33.261  33.600  43.038  1.00  0.00           H  
ATOM   2039  C   ILE C 128      29.890  31.858  45.767  1.00  0.00           C  
ATOM   2040  O   ILE C 128      29.069  32.669  45.341  1.00  0.00           O  
ATOM   2041  N   GLY C 129      29.539  30.847  46.573  1.00  0.00           N  
ATOM   2042  H   GLY C 129      30.268  30.208  46.869  1.00  0.00           H  
ATOM   2043  CA  GLY C 129      28.186  30.658  47.108  1.00  0.00           C  
ATOM   2044  HA2 GLY C 129      27.483  30.613  46.278  1.00  0.00           H  
ATOM   2045  HA3 GLY C 129      28.143  29.704  47.629  1.00  0.00           H  
ATOM   2046  C   GLY C 129      27.717  31.751  48.084  1.00  0.00           C  
ATOM   2047  O   GLY C 129      26.509  31.909  48.276  1.00  0.00           O  
ATOM   2048  N   SER C 130      28.622  32.552  48.658  1.00  0.00           N  
ATOM   2049  H   SER C 130      29.605  32.360  48.506  1.00  0.00           H  
ATOM   2050  CA  SER C 130      28.279  33.794  49.376  1.00  0.00           C  
ATOM   2051  HA  SER C 130      27.290  33.691  49.823  1.00  0.00           H  
ATOM   2052  CB  SER C 130      29.257  34.064  50.525  1.00  0.00           C  
ATOM   2053  HB2 SER C 130      30.281  34.112  50.151  1.00  0.00           H  
ATOM   2054  HB3 SER C 130      29.007  35.020  50.988  1.00  0.00           H  
ATOM   2055  OG  SER C 130      29.153  33.048  51.501  1.00  0.00           O  
ATOM   2056  HG  SER C 130      29.769  32.331  51.238  1.00  0.00           H  
ATOM   2057  C   SER C 130      28.219  35.000  48.430  1.00  0.00           C  
ATOM   2058  O   SER C 130      27.277  35.788  48.506  1.00  0.00           O  
ATOM   2059  N   GLY C 131      29.161  35.120  47.489  1.00  0.00           N  
ATOM   2060  H   GLY C 131      29.925  34.449  47.499  1.00  0.00           H  
ATOM   2061  CA  GLY C 131      29.207  36.201  46.497  1.00  0.00           C  
ATOM   2062  HA2 GLY C 131      29.292  37.159  47.011  1.00  0.00           H  
ATOM   2063  HA3 GLY C 131      30.091  36.065  45.873  1.00  0.00           H  
ATOM   2064  C   GLY C 131      27.978  36.245  45.581  1.00  0.00           C  
ATOM   2065  O   GLY C 131      27.392  37.311  45.391  1.00  0.00           O  
ATOM   2066  N   ILE C 132      27.519  35.091  45.075  1.00  0.00           N  
ATOM   2067  H   ILE C 132      28.052  34.242  45.241  1.00  0.00           H  
ATOM   2068  CA  ILE C 132      26.291  35.004  44.264  1.00  0.00           C  
ATOM   2069  HA  ILE C 132      26.379  35.737  43.459  1.00  0.00           H  
ATOM   2070  CB  ILE C 132      26.153  33.608  43.608  1.00  0.00           C  
ATOM   2071  HB  ILE C 132      27.103  33.387  43.119  1.00  0.00           H  
ATOM   2072  CG2 ILE C 132      25.883  32.489  44.634  1.00  0.00           C  
ATOM   2073 1HG2 ILE C 132      24.843  32.510  44.962  1.00  0.00           H  
ATOM   2074 2HG2 ILE C 132      26.096  31.518  44.185  1.00  0.00           H  
ATOM   2075 3HG2 ILE C 132      26.527  32.603  45.501  1.00  0.00           H  
ATOM   2076  CG1 ILE C 132      25.060  33.634  42.514  1.00  0.00           C  
ATOM   2077 2HG1 ILE C 132      24.091  33.849  42.965  1.00  0.00           H  
ATOM   2078 3HG1 ILE C 132      25.288  34.435  41.809  1.00  0.00           H  
ATOM   2079  CD1 ILE C 132      24.941  32.325  41.722  1.00  0.00           C  
ATOM   2080 1HD1 ILE C 132      24.623  31.509  42.372  1.00  0.00           H  
ATOM   2081 2HD1 ILE C 132      24.193  32.448  40.943  1.00  0.00           H  
ATOM   2082 3HD1 ILE C 132      25.898  32.077  41.264  1.00  0.00           H  
ATOM   2083  C   ILE C 132      25.047  35.392  45.075  1.00  0.00           C  
ATOM   2084  O   ILE C 132      24.183  36.108  44.571  1.00  0.00           O  
ATOM   2085  N   ARG C 133      24.978  34.994  46.355  1.00  0.00           N  
ATOM   2086  H   ARG C 133      25.740  34.441  46.719  1.00  0.00           H  
ATOM   2087  CA  ARG C 133      23.875  35.360  47.254  1.00  0.00           C  
ATOM   2088  HA  ARG C 133      22.932  35.187  46.735  1.00  0.00           H  
ATOM   2089  CB  ARG C 133      23.902  34.490  48.523  1.00  0.00           C  
ATOM   2090  HB2 ARG C 133      24.918  34.392  48.908  1.00  0.00           H  
ATOM   2091  HB3 ARG C 133      23.284  34.965  49.289  1.00  0.00           H  
ATOM   2092  CG  ARG C 133      23.310  33.110  48.211  1.00  0.00           C  
ATOM   2093  HG2 ARG C 133      22.349  33.268  47.727  1.00  0.00           H  
ATOM   2094  HG3 ARG C 133      23.953  32.560  47.523  1.00  0.00           H  
ATOM   2095  CD  ARG C 133      23.039  32.274  49.461  1.00  0.00           C  
ATOM   2096  HD2 ARG C 133      22.571  32.899  50.224  1.00  0.00           H  
ATOM   2097  HD3 ARG C 133      22.325  31.502  49.179  1.00  0.00           H  
ATOM   2098  NE  ARG C 133      24.237  31.616  50.012  1.00  0.00           N  
ATOM   2099  HE  ARG C 133      25.129  31.801  49.565  1.00  0.00           H  
ATOM   2100  CZ  ARG C 133      24.195  30.691  50.957  1.00  0.00           C  
ATOM   2101  NH1 ARG C 133      23.080  30.330  51.510  1.00  0.00           N  
ATOM   2102 1HH1 ARG C 133      22.203  30.765  51.253  1.00  0.00           H  
ATOM   2103 2HH1 ARG C 133      23.063  29.561  52.188  1.00  0.00           H  
ATOM   2104  NH2 ARG C 133      25.256  30.071  51.375  1.00  0.00           N  
ATOM   2105 1HH2 ARG C 133      26.171  30.293  51.037  1.00  0.00           H  
ATOM   2106 2HH2 ARG C 133      25.090  29.326  52.060  1.00  0.00           H  
ATOM   2107  C   ARG C 133      23.861  36.854  47.571  1.00  0.00           C  
ATOM   2108  O   ARG C 133      22.794  37.454  47.528  1.00  0.00           O  
ATOM   2109  N   TYR C 134      25.023  37.473  47.778  1.00  0.00           N  
ATOM   2110  H   TYR C 134      25.865  36.912  47.830  1.00  0.00           H  
ATOM   2111  CA  TYR C 134      25.131  38.925  47.936  1.00  0.00           C  
ATOM   2112  HA  TYR C 134      24.475  39.235  48.751  1.00  0.00           H  
ATOM   2113  CB  TYR C 134      26.572  39.284  48.318  1.00  0.00           C  
ATOM   2114  HB2 TYR C 134      26.785  38.878  49.308  1.00  0.00           H  
ATOM   2115  HB3 TYR C 134      27.260  38.811  47.618  1.00  0.00           H  
ATOM   2116  CG  TYR C 134      26.831  40.777  48.328  1.00  0.00           C  
ATOM   2117  CD1 TYR C 134      26.344  41.573  49.384  1.00  0.00           C  
ATOM   2118  HD1 TYR C 134      25.807  41.112  50.202  1.00  0.00           H  
ATOM   2119  CE1 TYR C 134      26.553  42.967  49.372  1.00  0.00           C  
ATOM   2120  HE1 TYR C 134      26.188  43.574  50.188  1.00  0.00           H  
ATOM   2121  CZ  TYR C 134      27.244  43.564  48.296  1.00  0.00           C  
ATOM   2122  OH  TYR C 134      27.454  44.906  48.276  1.00  0.00           O  
ATOM   2123  HH  TYR C 134      27.039  45.333  49.029  1.00  0.00           H  
ATOM   2124  CE2 TYR C 134      27.736  42.763  47.244  1.00  0.00           C  
ATOM   2125  HE2 TYR C 134      28.288  43.220  46.440  1.00  0.00           H  
ATOM   2126  CD2 TYR C 134      27.523  41.372  47.255  1.00  0.00           C  
ATOM   2127  HD2 TYR C 134      27.895  40.760  46.445  1.00  0.00           H  
ATOM   2128  C   TYR C 134      24.672  39.689  46.679  1.00  0.00           C  
ATOM   2129  O   TYR C 134      23.912  40.652  46.793  1.00  0.00           O  
ATOM   2130  N   LEU C 135      25.072  39.248  45.478  1.00  0.00           N  
ATOM   2131  H   LEU C 135      25.721  38.468  45.439  1.00  0.00           H  
ATOM   2132  CA  LEU C 135      24.610  39.848  44.219  1.00  0.00           C  
ATOM   2133  HA  LEU C 135      24.821  40.916  44.238  1.00  0.00           H  
ATOM   2134  CB  LEU C 135      25.358  39.207  43.032  1.00  0.00           C  
ATOM   2135  HB2 LEU C 135      25.281  38.122  43.119  1.00  0.00           H  
ATOM   2136  HB3 LEU C 135      24.858  39.496  42.106  1.00  0.00           H  
ATOM   2137  CG  LEU C 135      26.844  39.598  42.922  1.00  0.00           C  
ATOM   2138  HG  LEU C 135      27.341  39.456  43.879  1.00  0.00           H  
ATOM   2139  CD1 LEU C 135      27.536  38.716  41.881  1.00  0.00           C  
ATOM   2140 1HD1 LEU C 135      27.061  38.845  40.909  1.00  0.00           H  
ATOM   2141 2HD1 LEU C 135      28.591  38.984  41.810  1.00  0.00           H  
ATOM   2142 3HD1 LEU C 135      27.464  37.671  42.183  1.00  0.00           H  
ATOM   2143  CD2 LEU C 135      27.024  41.056  42.489  1.00  0.00           C  
ATOM   2144 1HD2 LEU C 135      26.633  41.724  43.254  1.00  0.00           H  
ATOM   2145 2HD2 LEU C 135      28.083  41.267  42.353  1.00  0.00           H  
ATOM   2146 3HD2 LEU C 135      26.499  41.235  41.551  1.00  0.00           H  
ATOM   2147  C   LEU C 135      23.085  39.714  44.054  1.00  0.00           C  
ATOM   2148  O   LEU C 135      22.407  40.708  43.797  1.00  0.00           O  
ATOM   2149  N   HIS C 136      22.532  38.517  44.281  1.00  0.00           N  
ATOM   2150  H   HIS C 136      23.146  37.738  44.492  1.00  0.00           H  
ATOM   2151  CA  HIS C 136      21.097  38.238  44.110  1.00  0.00           C  
ATOM   2152  HA  HIS C 136      20.773  38.668  43.159  1.00  0.00           H  
ATOM   2153  CB  HIS C 136      20.875  36.717  44.031  1.00  0.00           C  
ATOM   2154  HB2 HIS C 136      21.446  36.218  44.815  1.00  0.00           H  
ATOM   2155  HB3 HIS C 136      19.819  36.516  44.217  1.00  0.00           H  
ATOM   2156  CG  HIS C 136      21.217  36.099  42.690  1.00  0.00           C  
ATOM   2157  ND1 HIS C 136      20.447  35.126  42.042  1.00  0.00           N  
ATOM   2158  CE1 HIS C 136      21.029  34.945  40.841  1.00  0.00           C  
ATOM   2159  HE1 HIS C 136      20.663  34.275  40.075  1.00  0.00           H  
ATOM   2160  NE2 HIS C 136      22.126  35.710  40.720  1.00  0.00           N  
ATOM   2161  HE2 HIS C 136      22.709  35.790  39.881  1.00  0.00           H  
ATOM   2162  CD2 HIS C 136      22.255  36.448  41.873  1.00  0.00           C  
ATOM   2163  HD2 HIS C 136      22.999  37.207  42.063  1.00  0.00           H  
ATOM   2164  C   HIS C 136      20.221  38.895  45.191  1.00  0.00           C  
ATOM   2165  O   HIS C 136      19.081  39.272  44.913  1.00  0.00           O  
ATOM   2166  N   GLU C 137      20.743  39.124  46.400  1.00  0.00           N  
ATOM   2167  H   GLU C 137      21.650  38.725  46.625  1.00  0.00           H  
ATOM   2168  CA  GLU C 137      20.059  39.916  47.433  1.00  0.00           C  
ATOM   2169  HA  GLU C 137      19.022  39.583  47.485  1.00  0.00           H  
ATOM   2170  CB  GLU C 137      20.702  39.647  48.803  1.00  0.00           C  
ATOM   2171  HB2 GLU C 137      20.752  38.567  48.950  1.00  0.00           H  
ATOM   2172  HB3 GLU C 137      21.713  40.057  48.826  1.00  0.00           H  
ATOM   2173  CG  GLU C 137      19.867  40.256  49.939  1.00  0.00           C  
ATOM   2174  HG2 GLU C 137      19.899  41.344  49.863  1.00  0.00           H  
ATOM   2175  HG3 GLU C 137      18.828  39.938  49.817  1.00  0.00           H  
ATOM   2176  CD  GLU C 137      20.337  39.850  51.341  1.00  0.00           C  
ATOM   2177  OE1 GLU C 137      19.746  40.361  52.322  1.00  0.00           O  
ATOM   2178  OE2 GLU C 137      21.269  39.027  51.490  1.00  0.00           O  
ATOM   2179  C   GLU C 137      20.027  41.416  47.087  1.00  0.00           C  
ATOM   2180  O   GLU C 137      19.044  42.095  47.384  1.00  0.00           O  
ATOM   2181  N   ASN C 138      21.033  41.915  46.363  1.00  0.00           N  
ATOM   2182  H   ASN C 138      21.814  41.302  46.152  1.00  0.00           H  
ATOM   2183  CA  ASN C 138      21.021  43.240  45.729  1.00  0.00           C  
ATOM   2184  HA  ASN C 138      20.409  43.907  46.338  1.00  0.00           H  
ATOM   2185  CB  ASN C 138      22.452  43.808  45.728  1.00  0.00           C  
ATOM   2186  HB2 ASN C 138      23.139  43.097  45.268  1.00  0.00           H  
ATOM   2187  HB3 ASN C 138      22.480  44.730  45.148  1.00  0.00           H  
ATOM   2188  CG  ASN C 138      22.905  44.142  47.135  1.00  0.00           C  
ATOM   2189  OD1 ASN C 138      22.541  45.169  47.689  1.00  0.00           O  
ATOM   2190  ND2 ASN C 138      23.673  43.293  47.770  1.00  0.00           N  
ATOM   2191 1HD2 ASN C 138      23.937  43.516  48.709  1.00  0.00           H  
ATOM   2192 2HD2 ASN C 138      23.895  42.394  47.352  1.00  0.00           H  
ATOM   2193  C   ASN C 138      20.352  43.234  44.335  1.00  0.00           C  
ATOM   2194  O   ASN C 138      20.453  44.219  43.606  1.00  0.00           O  
ATOM   2195  N   LYS C 139      19.642  42.151  43.978  1.00  0.00           N  
ATOM   2196  H   LYS C 139      19.616  41.389  44.644  1.00  0.00           H  
ATOM   2197  CA  LYS C 139      18.891  41.959  42.720  1.00  0.00           C  
ATOM   2198  HA  LYS C 139      18.586  40.913  42.703  1.00  0.00           H  
ATOM   2199  CB  LYS C 139      17.593  42.793  42.712  1.00  0.00           C  
ATOM   2200  HB2 LYS C 139      17.840  43.856  42.681  1.00  0.00           H  
ATOM   2201  HB3 LYS C 139      17.026  42.545  41.813  1.00  0.00           H  
ATOM   2202  CG  LYS C 139      16.711  42.508  43.934  1.00  0.00           C  
ATOM   2203  HG2 LYS C 139      16.571  41.431  44.031  1.00  0.00           H  
ATOM   2204  HG3 LYS C 139      17.206  42.881  44.833  1.00  0.00           H  
ATOM   2205  CD  LYS C 139      15.336  43.177  43.809  1.00  0.00           C  
ATOM   2206  HD2 LYS C 139      15.464  44.253  43.688  1.00  0.00           H  
ATOM   2207  HD3 LYS C 139      14.812  42.769  42.943  1.00  0.00           H  
ATOM   2208  CE  LYS C 139      14.554  42.882  45.092  1.00  0.00           C  
ATOM   2209  HE2 LYS C 139      14.525  41.799  45.247  1.00  0.00           H  
ATOM   2210  HE3 LYS C 139      15.106  43.308  45.936  1.00  0.00           H  
ATOM   2211  NZ  LYS C 139      13.181  43.433  45.072  1.00  0.00           N  
ATOM   2212  HZ1 LYS C 139      12.624  42.998  44.353  1.00  0.00           H  
ATOM   2213  HZ2 LYS C 139      12.750  43.242  45.976  1.00  0.00           H  
ATOM   2214  HZ3 LYS C 139      13.197  44.434  44.939  1.00  0.00           H  
ATOM   2215  C   LYS C 139      19.724  42.124  41.440  1.00  0.00           C  
ATOM   2216  O   LYS C 139      19.200  42.517  40.401  1.00  0.00           O  
ATOM   2217  N   ILE C 140      21.014  41.791  41.496  1.00  0.00           N  
ATOM   2218  H   ILE C 140      21.379  41.458  42.381  1.00  0.00           H  
ATOM   2219  CA  ILE C 140      21.915  41.751  40.337  1.00  0.00           C  
ATOM   2220  HA  ILE C 140      21.431  42.242  39.495  1.00  0.00           H  
ATOM   2221  CB  ILE C 140      23.223  42.523  40.629  1.00  0.00           C  
ATOM   2222  HB  ILE C 140      23.655  42.136  41.555  1.00  0.00           H  
ATOM   2223  CG2 ILE C 140      24.265  42.331  39.506  1.00  0.00           C  
ATOM   2224 1HG2 ILE C 140      23.863  42.687  38.557  1.00  0.00           H  
ATOM   2225 2HG2 ILE C 140      25.183  42.870  39.736  1.00  0.00           H  
ATOM   2226 3HG2 ILE C 140      24.536  41.281  39.412  1.00  0.00           H  
ATOM   2227  CG1 ILE C 140      22.894  44.021  40.823  1.00  0.00           C  
ATOM   2228 2HG1 ILE C 140      22.405  44.407  39.927  1.00  0.00           H  
ATOM   2229 3HG1 ILE C 140      22.199  44.126  41.654  1.00  0.00           H  
ATOM   2230  CD1 ILE C 140      24.108  44.901  41.136  1.00  0.00           C  
ATOM   2231 1HD1 ILE C 140      24.718  45.027  40.244  1.00  0.00           H  
ATOM   2232 2HD1 ILE C 140      23.769  45.882  41.469  1.00  0.00           H  
ATOM   2233 3HD1 ILE C 140      24.699  44.436  41.924  1.00  0.00           H  
ATOM   2234  C   ILE C 140      22.177  40.301  39.928  1.00  0.00           C  
ATOM   2235  O   ILE C 140      22.472  39.458  40.775  1.00  0.00           O  
ATOM   2236  N   ILE C 141      22.147  40.044  38.619  1.00  0.00           N  
ATOM   2237  H   ILE C 141      21.889  40.804  37.997  1.00  0.00           H  
ATOM   2238  CA  ILE C 141      22.680  38.821  38.003  1.00  0.00           C  
ATOM   2239  HA  ILE C 141      22.918  38.118  38.801  1.00  0.00           H  
ATOM   2240  CB  ILE C 141      21.643  38.126  37.100  1.00  0.00           C  
ATOM   2241  HB  ILE C 141      22.106  37.220  36.706  1.00  0.00           H  
ATOM   2242  CG2 ILE C 141      20.445  37.707  37.964  1.00  0.00           C  
ATOM   2243 1HG2 ILE C 141      19.809  38.565  38.186  1.00  0.00           H  
ATOM   2244 2HG2 ILE C 141      19.882  36.950  37.438  1.00  0.00           H  
ATOM   2245 3HG2 ILE C 141      20.790  37.273  38.902  1.00  0.00           H  
ATOM   2246  CG1 ILE C 141      21.188  38.992  35.902  1.00  0.00           C  
ATOM   2247 2HG1 ILE C 141      20.661  39.869  36.271  1.00  0.00           H  
ATOM   2248 3HG1 ILE C 141      22.059  39.342  35.355  1.00  0.00           H  
ATOM   2249  CD1 ILE C 141      20.278  38.252  34.913  1.00  0.00           C  
ATOM   2250 1HD1 ILE C 141      19.348  37.952  35.396  1.00  0.00           H  
ATOM   2251 2HD1 ILE C 141      20.037  38.914  34.081  1.00  0.00           H  
ATOM   2252 3HD1 ILE C 141      20.785  37.365  34.532  1.00  0.00           H  
ATOM   2253  C   ILE C 141      23.998  39.101  37.281  1.00  0.00           C  
ATOM   2254  O   ILE C 141      24.176  40.171  36.699  1.00  0.00           O  
ATOM   2255  N   HIS C 142      24.935  38.154  37.320  1.00  0.00           N  
ATOM   2256  H   HIS C 142      24.677  37.270  37.762  1.00  0.00           H  
ATOM   2257  CA  HIS C 142      26.310  38.327  36.823  1.00  0.00           C  
ATOM   2258  HA  HIS C 142      26.600  39.371  36.941  1.00  0.00           H  
ATOM   2259  CB  HIS C 142      27.253  37.481  37.689  1.00  0.00           C  
ATOM   2260  HB2 HIS C 142      27.147  37.781  38.731  1.00  0.00           H  
ATOM   2261  HB3 HIS C 142      26.960  36.432  37.611  1.00  0.00           H  
ATOM   2262  CG  HIS C 142      28.704  37.600  37.296  1.00  0.00           C  
ATOM   2263  ND1 HIS C 142      29.340  36.784  36.365  1.00  0.00           N  
ATOM   2264  CE1 HIS C 142      30.609  37.221  36.300  1.00  0.00           C  
ATOM   2265  HE1 HIS C 142      31.376  36.800  35.663  1.00  0.00           H  
ATOM   2266  NE2 HIS C 142      30.795  38.261  37.125  1.00  0.00           N  
ATOM   2267  HE2 HIS C 142      31.679  38.767  37.221  1.00  0.00           H  
ATOM   2268  CD2 HIS C 142      29.600  38.516  37.768  1.00  0.00           C  
ATOM   2269  HD2 HIS C 142      29.403  39.285  38.499  1.00  0.00           H  
ATOM   2270  C   HIS C 142      26.467  38.006  35.330  1.00  0.00           C  
ATOM   2271  O   HIS C 142      27.225  38.687  34.636  1.00  0.00           O  
ATOM   2272  N   ARG C 143      25.731  36.998  34.835  1.00  0.00           N  
ATOM   2273  H   ARG C 143      25.152  36.492  35.507  1.00  0.00           H  
ATOM   2274  CA  ARG C 143      25.684  36.529  33.431  1.00  0.00           C  
ATOM   2275  HA  ARG C 143      25.095  35.612  33.434  1.00  0.00           H  
ATOM   2276  CB  ARG C 143      24.940  37.541  32.544  1.00  0.00           C  
ATOM   2277  HB2 ARG C 143      25.550  38.439  32.435  1.00  0.00           H  
ATOM   2278  HB3 ARG C 143      24.804  37.092  31.559  1.00  0.00           H  
ATOM   2279  CG  ARG C 143      23.564  37.941  33.083  1.00  0.00           C  
ATOM   2280  HG2 ARG C 143      23.033  37.048  33.412  1.00  0.00           H  
ATOM   2281  HG3 ARG C 143      23.682  38.620  33.926  1.00  0.00           H  
ATOM   2282  CD  ARG C 143      22.744  38.616  31.982  1.00  0.00           C  
ATOM   2283  HD2 ARG C 143      22.709  37.949  31.119  1.00  0.00           H  
ATOM   2284  HD3 ARG C 143      21.732  38.767  32.359  1.00  0.00           H  
ATOM   2285  NE  ARG C 143      23.295  39.916  31.569  1.00  0.00           N  
ATOM   2286  HE  ARG C 143      24.174  40.228  31.972  1.00  0.00           H  
ATOM   2287  CZ  ARG C 143      22.703  40.796  30.786  1.00  0.00           C  
ATOM   2288  NH1 ARG C 143      21.624  40.537  30.115  1.00  0.00           N  
ATOM   2289 1HH1 ARG C 143      21.441  39.608  29.779  1.00  0.00           H  
ATOM   2290 2HH1 ARG C 143      21.274  41.312  29.542  1.00  0.00           H  
ATOM   2291  NH2 ARG C 143      23.171  41.995  30.660  1.00  0.00           N  
ATOM   2292 1HH2 ARG C 143      24.064  42.221  31.074  1.00  0.00           H  
ATOM   2293 2HH2 ARG C 143      22.672  42.618  30.024  1.00  0.00           H  
ATOM   2294  C   ARG C 143      27.016  36.111  32.787  1.00  0.00           C  
ATOM   2295  O   ARG C 143      27.075  35.917  31.571  1.00  0.00           O  
ATOM   2296  N   ASP C 144      28.089  35.966  33.561  1.00  0.00           N  
ATOM   2297  H   ASP C 144      28.022  36.255  34.527  1.00  0.00           H  
ATOM   2298  CA  ASP C 144      29.415  35.609  33.041  1.00  0.00           C  
ATOM   2299  HA  ASP C 144      29.254  35.013  32.146  1.00  0.00           H  
ATOM   2300  CB  ASP C 144      30.154  36.915  32.656  1.00  0.00           C  
ATOM   2301  HB2 ASP C 144      29.420  37.674  32.379  1.00  0.00           H  
ATOM   2302  HB3 ASP C 144      30.707  37.298  33.513  1.00  0.00           H  
ATOM   2303  CG  ASP C 144      31.091  36.763  31.454  1.00  0.00           C  
ATOM   2304  OD1 ASP C 144      30.913  35.806  30.667  1.00  0.00           O  
ATOM   2305  OD2 ASP C 144      31.992  37.613  31.277  1.00  0.00           O  
ATOM   2306  C   ASP C 144      30.224  34.693  33.989  1.00  0.00           C  
ATOM   2307  O   ASP C 144      31.448  34.598  33.884  1.00  0.00           O  
ATOM   2308  N   LEU C 145      29.546  34.028  34.936  1.00  0.00           N  
ATOM   2309  H   LEU C 145      28.538  34.102  34.914  1.00  0.00           H  
ATOM   2310  CA  LEU C 145      30.161  33.397  36.113  1.00  0.00           C  
ATOM   2311  HA  LEU C 145      30.961  34.061  36.446  1.00  0.00           H  
ATOM   2312  CB  LEU C 145      29.118  33.321  37.250  1.00  0.00           C  
ATOM   2313  HB2 LEU C 145      28.683  34.310  37.398  1.00  0.00           H  
ATOM   2314  HB3 LEU C 145      28.323  32.644  36.942  1.00  0.00           H  
ATOM   2315  CG  LEU C 145      29.669  32.829  38.603  1.00  0.00           C  
ATOM   2316  HG  LEU C 145      30.108  31.841  38.480  1.00  0.00           H  
ATOM   2317  CD1 LEU C 145      30.726  33.769  39.185  1.00  0.00           C  
ATOM   2318 1HD1 LEU C 145      30.330  34.784  39.253  1.00  0.00           H  
ATOM   2319 2HD1 LEU C 145      31.016  33.431  40.180  1.00  0.00           H  
ATOM   2320 3HD1 LEU C 145      31.614  33.774  38.556  1.00  0.00           H  
ATOM   2321  CD2 LEU C 145      28.525  32.716  39.612  1.00  0.00           C  
ATOM   2322 1HD2 LEU C 145      27.755  32.049  39.223  1.00  0.00           H  
ATOM   2323 2HD2 LEU C 145      28.898  32.306  40.550  1.00  0.00           H  
ATOM   2324 3HD2 LEU C 145      28.087  33.697  39.798  1.00  0.00           H  
ATOM   2325  C   LEU C 145      30.799  32.035  35.783  1.00  0.00           C  
ATOM   2326  O   LEU C 145      30.163  30.987  35.905  1.00  0.00           O  
ATOM   2327  N   LYS C 146      32.072  32.064  35.382  1.00  0.00           N  
ATOM   2328  H   LYS C 146      32.494  32.979  35.287  1.00  0.00           H  
ATOM   2329  CA  LYS C 146      32.894  30.899  35.011  1.00  0.00           C  
ATOM   2330  HA  LYS C 146      32.414  30.007  35.413  1.00  0.00           H  
ATOM   2331  CB  LYS C 146      32.897  30.791  33.471  1.00  0.00           C  
ATOM   2332  HB2 LYS C 146      33.168  29.778  33.179  1.00  0.00           H  
ATOM   2333  HB3 LYS C 146      31.886  30.975  33.102  1.00  0.00           H  
ATOM   2334  CG  LYS C 146      33.872  31.760  32.786  1.00  0.00           C  
ATOM   2335  HG2 LYS C 146      33.724  32.760  33.186  1.00  0.00           H  
ATOM   2336  HG3 LYS C 146      34.886  31.447  33.021  1.00  0.00           H  
ATOM   2337  CD  LYS C 146      33.719  31.774  31.256  1.00  0.00           C  
ATOM   2338  HD2 LYS C 146      34.661  32.086  30.803  1.00  0.00           H  
ATOM   2339  HD3 LYS C 146      33.506  30.763  30.907  1.00  0.00           H  
ATOM   2340  CE  LYS C 146      32.606  32.723  30.796  1.00  0.00           C  
ATOM   2341  HE2 LYS C 146      32.340  32.491  29.760  1.00  0.00           H  
ATOM   2342  HE3 LYS C 146      31.721  32.568  31.419  1.00  0.00           H  
ATOM   2343  NZ  LYS C 146      33.038  34.137  30.877  1.00  0.00           N  
ATOM   2344  HZ1 LYS C 146      33.773  34.343  30.219  1.00  0.00           H  
ATOM   2345  HZ2 LYS C 146      32.258  34.764  30.679  1.00  0.00           H  
ATOM   2346  HZ3 LYS C 146      33.376  34.376  31.808  1.00  0.00           H  
ATOM   2347  C   LYS C 146      34.307  30.984  35.632  1.00  0.00           C  
ATOM   2348  O   LYS C 146      34.657  32.050  36.139  1.00  0.00           O  
ATOM   2349  N   PRO C 147      35.146  29.928  35.571  1.00  0.00           N  
ATOM   2350  CD  PRO C 147      34.789  28.587  35.140  1.00  0.00           C  
ATOM   2351  HD2 PRO C 147      34.822  28.531  34.051  1.00  0.00           H  
ATOM   2352  HD3 PRO C 147      33.803  28.308  35.509  1.00  0.00           H  
ATOM   2353  CG  PRO C 147      35.839  27.652  35.734  1.00  0.00           C  
ATOM   2354  HG2 PRO C 147      35.999  26.771  35.112  1.00  0.00           H  
ATOM   2355  HG3 PRO C 147      35.552  27.359  36.743  1.00  0.00           H  
ATOM   2356  CB  PRO C 147      37.073  28.544  35.797  1.00  0.00           C  
ATOM   2357  HB2 PRO C 147      37.540  28.571  34.813  1.00  0.00           H  
ATOM   2358  HB3 PRO C 147      37.784  28.197  36.546  1.00  0.00           H  
ATOM   2359  CA  PRO C 147      36.500  29.921  36.147  1.00  0.00           C  
ATOM   2360  HA  PRO C 147      36.398  30.001  37.228  1.00  0.00           H  
ATOM   2361  C   PRO C 147      37.442  31.042  35.672  1.00  0.00           C  
ATOM   2362  O   PRO C 147      38.358  31.417  36.396  1.00  0.00           O  
ATOM   2363  N   GLU C 148      37.225  31.594  34.478  1.00  0.00           N  
ATOM   2364  H   GLU C 148      36.612  31.094  33.842  1.00  0.00           H  
ATOM   2365  CA  GLU C 148      37.944  32.767  33.956  1.00  0.00           C  
ATOM   2366  HA  GLU C 148      39.012  32.635  34.136  1.00  0.00           H  
ATOM   2367  CB  GLU C 148      37.715  32.877  32.435  1.00  0.00           C  
ATOM   2368  HB2 GLU C 148      36.656  33.028  32.228  1.00  0.00           H  
ATOM   2369  HB3 GLU C 148      38.244  33.767  32.090  1.00  0.00           H  
ATOM   2370  CG  GLU C 148      38.239  31.688  31.610  1.00  0.00           C  
ATOM   2371  HG2 GLU C 148      38.552  32.075  30.637  1.00  0.00           H  
ATOM   2372  HG3 GLU C 148      39.132  31.284  32.089  1.00  0.00           H  
ATOM   2373  CD  GLU C 148      37.205  30.573  31.381  1.00  0.00           C  
ATOM   2374  OE1 GLU C 148      36.759  30.415  30.224  1.00  0.00           O  
ATOM   2375  OE2 GLU C 148      36.883  29.821  32.333  1.00  0.00           O  
ATOM   2376  C   GLU C 148      37.545  34.100  34.628  1.00  0.00           C  
ATOM   2377  O   GLU C 148      38.292  35.075  34.529  1.00  0.00           O  
ATOM   2378  N   ASN C 149      36.387  34.142  35.302  1.00  0.00           N  
ATOM   2379  H   ASN C 149      35.870  33.274  35.375  1.00  0.00           H  
ATOM   2380  CA  ASN C 149      35.759  35.320  35.920  1.00  0.00           C  
ATOM   2381  HA  ASN C 149      36.360  36.198  35.682  1.00  0.00           H  
ATOM   2382  CB  ASN C 149      34.345  35.530  35.332  1.00  0.00           C  
ATOM   2383  HB2 ASN C 149      33.754  34.632  35.495  1.00  0.00           H  
ATOM   2384  HB3 ASN C 149      33.860  36.335  35.883  1.00  0.00           H  
ATOM   2385  CG  ASN C 149      34.271  35.877  33.851  1.00  0.00           C  
ATOM   2386  OD1 ASN C 149      34.594  35.093  32.968  1.00  0.00           O  
ATOM   2387  ND2 ASN C 149      33.757  37.042  33.529  1.00  0.00           N  
ATOM   2388 1HD2 ASN C 149      33.522  37.234  32.560  1.00  0.00           H  
ATOM   2389 2HD2 ASN C 149      33.509  37.702  34.245  1.00  0.00           H  
ATOM   2390  C   ASN C 149      35.700  35.230  37.468  1.00  0.00           C  
ATOM   2391  O   ASN C 149      34.998  36.024  38.104  1.00  0.00           O  
ATOM   2392  N   ILE C 150      36.426  34.297  38.096  1.00  0.00           N  
ATOM   2393  H   ILE C 150      36.989  33.670  37.536  1.00  0.00           H  
ATOM   2394  CA  ILE C 150      36.677  34.304  39.549  1.00  0.00           C  
ATOM   2395  HA  ILE C 150      36.421  35.300  39.911  1.00  0.00           H  
ATOM   2396  CB  ILE C 150      35.782  33.324  40.354  1.00  0.00           C  
ATOM   2397  HB  ILE C 150      35.780  33.688  41.383  1.00  0.00           H  
ATOM   2398  CG2 ILE C 150      34.313  33.355  39.898  1.00  0.00           C  
ATOM   2399 1HG2 ILE C 150      34.219  32.940  38.894  1.00  0.00           H  
ATOM   2400 2HG2 ILE C 150      33.702  32.771  40.585  1.00  0.00           H  
ATOM   2401 3HG2 ILE C 150      33.948  34.383  39.901  1.00  0.00           H  
ATOM   2402  CG1 ILE C 150      36.277  31.857  40.379  1.00  0.00           C  
ATOM   2403 2HG1 ILE C 150      35.427  31.173  40.348  1.00  0.00           H  
ATOM   2404 3HG1 ILE C 150      36.892  31.651  39.503  1.00  0.00           H  
ATOM   2405  CD1 ILE C 150      37.059  31.549  41.663  1.00  0.00           C  
ATOM   2406 1HD1 ILE C 150      36.416  31.705  42.526  1.00  0.00           H  
ATOM   2407 2HD1 ILE C 150      37.376  30.509  41.672  1.00  0.00           H  
ATOM   2408 3HD1 ILE C 150      37.939  32.186  41.747  1.00  0.00           H  
ATOM   2409  C   ILE C 150      38.173  34.137  39.832  1.00  0.00           C  
ATOM   2410  O   ILE C 150      38.872  33.408  39.125  1.00  0.00           O  
ATOM   2411  N   VAL C 151      38.659  34.825  40.864  1.00  0.00           N  
ATOM   2412  H   VAL C 151      38.004  35.358  41.428  1.00  0.00           H  
ATOM   2413  CA  VAL C 151      40.078  34.895  41.241  1.00  0.00           C  
ATOM   2414  HA  VAL C 151      40.625  34.157  40.657  1.00  0.00           H  
ATOM   2415  CB  VAL C 151      40.704  36.272  40.937  1.00  0.00           C  
ATOM   2416  HB  VAL C 151      41.718  36.287  41.338  1.00  0.00           H  
ATOM   2417  CG1 VAL C 151      40.806  36.519  39.429  1.00  0.00           C  
ATOM   2418 1HG1 VAL C 151      39.819  36.484  38.973  1.00  0.00           H  
ATOM   2419 2HG1 VAL C 151      41.257  37.495  39.242  1.00  0.00           H  
ATOM   2420 3HG1 VAL C 151      41.436  35.757  38.974  1.00  0.00           H  
ATOM   2421  CG2 VAL C 151      39.923  37.426  41.580  1.00  0.00           C  
ATOM   2422 1HG2 VAL C 151      39.880  37.283  42.658  1.00  0.00           H  
ATOM   2423 2HG2 VAL C 151      40.415  38.372  41.359  1.00  0.00           H  
ATOM   2424 3HG2 VAL C 151      38.909  37.453  41.188  1.00  0.00           H  
ATOM   2425  C   VAL C 151      40.295  34.527  42.703  1.00  0.00           C  
ATOM   2426  O   VAL C 151      39.444  34.757  43.562  1.00  0.00           O  
ATOM   2427  N   LEU C 152      41.465  33.964  42.978  1.00  0.00           N  
ATOM   2428  H   LEU C 152      42.102  33.805  42.204  1.00  0.00           H  
ATOM   2429  CA  LEU C 152      41.914  33.534  44.290  1.00  0.00           C  
ATOM   2430  HA  LEU C 152      41.052  33.348  44.932  1.00  0.00           H  
ATOM   2431  CB  LEU C 152      42.713  32.225  44.152  1.00  0.00           C  
ATOM   2432  HB2 LEU C 152      43.428  32.324  43.334  1.00  0.00           H  
ATOM   2433  HB3 LEU C 152      43.283  32.086  45.071  1.00  0.00           H  
ATOM   2434  CG  LEU C 152      41.864  30.956  43.931  1.00  0.00           C  
ATOM   2435  HG  LEU C 152      41.177  30.848  44.770  1.00  0.00           H  
ATOM   2436  CD1 LEU C 152      41.057  30.933  42.631  1.00  0.00           C  
ATOM   2437 1HD1 LEU C 152      41.699  31.176  41.783  1.00  0.00           H  
ATOM   2438 2HD1 LEU C 152      40.614  29.950  42.482  1.00  0.00           H  
ATOM   2439 3HD1 LEU C 152      40.240  31.650  42.692  1.00  0.00           H  
ATOM   2440  CD2 LEU C 152      42.790  29.739  43.907  1.00  0.00           C  
ATOM   2441 1HD2 LEU C 152      43.403  29.714  44.807  1.00  0.00           H  
ATOM   2442 2HD2 LEU C 152      42.193  28.830  43.865  1.00  0.00           H  
ATOM   2443 3HD2 LEU C 152      43.443  29.789  43.034  1.00  0.00           H  
ATOM   2444  C   LEU C 152      42.752  34.648  44.923  1.00  0.00           C  
ATOM   2445  O   LEU C 152      43.663  35.201  44.307  1.00  0.00           O  
ATOM   2446  N   GLN C 153      42.465  34.948  46.182  1.00  0.00           N  
ATOM   2447  H   GLN C 153      41.676  34.477  46.613  1.00  0.00           H  
ATOM   2448  CA  GLN C 153      43.221  35.857  47.028  1.00  0.00           C  
ATOM   2449  HA  GLN C 153      43.987  36.360  46.437  1.00  0.00           H  
ATOM   2450  CB  GLN C 153      42.244  36.910  47.586  1.00  0.00           C  
ATOM   2451  HB2 GLN C 153      41.759  37.427  46.755  1.00  0.00           H  
ATOM   2452  HB3 GLN C 153      41.469  36.400  48.161  1.00  0.00           H  
ATOM   2453  CG  GLN C 153      42.906  37.951  48.497  1.00  0.00           C  
ATOM   2454  HG2 GLN C 153      42.127  38.539  48.981  1.00  0.00           H  
ATOM   2455  HG3 GLN C 153      43.468  37.438  49.273  1.00  0.00           H  
ATOM   2456  CD  GLN C 153      43.840  38.882  47.734  1.00  0.00           C  
ATOM   2457  OE1 GLN C 153      44.906  38.495  47.283  1.00  0.00           O  
ATOM   2458  NE2 GLN C 153      43.451  40.116  47.506  1.00  0.00           N  
ATOM   2459 1HE2 GLN C 153      44.036  40.664  46.877  1.00  0.00           H  
ATOM   2460 2HE2 GLN C 153      42.563  40.470  47.804  1.00  0.00           H  
ATOM   2461  C   GLN C 153      43.909  35.037  48.124  1.00  0.00           C  
ATOM   2462  O   GLN C 153      43.234  34.357  48.900  1.00  0.00           O  
ATOM   2463  N   ASP C 154      45.239  35.106  48.212  1.00  0.00           N  
ATOM   2464  H   ASP C 154      45.750  35.710  47.576  1.00  0.00           H  
ATOM   2465  CA  ASP C 154      45.992  34.507  49.316  1.00  0.00           C  
ATOM   2466  HA  ASP C 154      45.351  33.797  49.842  1.00  0.00           H  
ATOM   2467  CB  ASP C 154      47.205  33.708  48.818  1.00  0.00           C  
ATOM   2468  HB2 ASP C 154      46.872  32.970  48.087  1.00  0.00           H  
ATOM   2469  HB3 ASP C 154      47.910  34.377  48.325  1.00  0.00           H  
ATOM   2470  CG  ASP C 154      47.921  32.983  49.968  1.00  0.00           C  
ATOM   2471  OD1 ASP C 154      49.072  32.530  49.775  1.00  0.00           O  
ATOM   2472  OD2 ASP C 154      47.340  32.828  51.072  1.00  0.00           O  
ATOM   2473  C   ASP C 154      46.415  35.592  50.311  1.00  0.00           C  
ATOM   2474  O   ASP C 154      47.228  36.462  49.995  1.00  0.00           O  
ATOM   2475  N   VAL C 155      45.864  35.508  51.522  1.00  0.00           N  
ATOM   2476  H   VAL C 155      45.212  34.750  51.675  1.00  0.00           H  
ATOM   2477  CA  VAL C 155      46.167  36.381  52.670  1.00  0.00           C  
ATOM   2478  HA  VAL C 155      46.936  37.088  52.358  1.00  0.00           H  
ATOM   2479  CB  VAL C 155      44.939  37.218  53.096  1.00  0.00           C  
ATOM   2480  HB  VAL C 155      45.155  37.729  54.033  1.00  0.00           H  
ATOM   2481  CG1 VAL C 155      44.677  38.311  52.056  1.00  0.00           C  
ATOM   2482 1HG1 VAL C 155      44.524  37.862  51.080  1.00  0.00           H  
ATOM   2483 2HG1 VAL C 155      43.800  38.895  52.335  1.00  0.00           H  
ATOM   2484 3HG1 VAL C 155      45.541  38.975  51.998  1.00  0.00           H  
ATOM   2485  CG2 VAL C 155      43.670  36.376  53.289  1.00  0.00           C  
ATOM   2486 1HG2 VAL C 155      43.864  35.570  53.997  1.00  0.00           H  
ATOM   2487 2HG2 VAL C 155      42.873  37.005  53.687  1.00  0.00           H  
ATOM   2488 3HG2 VAL C 155      43.337  35.950  52.341  1.00  0.00           H  
ATOM   2489  C   VAL C 155      46.805  35.611  53.834  1.00  0.00           C  
ATOM   2490  O   VAL C 155      46.763  36.063  54.978  1.00  0.00           O  
ATOM   2491  N   GLY C 156      47.406  34.452  53.541  1.00  0.00           N  
ATOM   2492  H   GLY C 156      47.376  34.126  52.577  1.00  0.00           H  
ATOM   2493  CA  GLY C 156      48.054  33.573  54.513  1.00  0.00           C  
ATOM   2494  HA2 GLY C 156      49.040  33.296  54.142  1.00  0.00           H  
ATOM   2495  HA3 GLY C 156      48.188  34.091  55.464  1.00  0.00           H  
ATOM   2496  C   GLY C 156      47.241  32.306  54.772  1.00  0.00           C  
ATOM   2497  O   GLY C 156      46.299  32.305  55.564  1.00  0.00           O  
ATOM   2498  N   GLY C 157      47.618  31.208  54.111  1.00  0.00           N  
ATOM   2499  H   GLY C 157      48.329  31.317  53.400  1.00  0.00           H  
ATOM   2500  CA  GLY C 157      47.223  29.835  54.462  1.00  0.00           C  
ATOM   2501  HA2 GLY C 157      47.921  29.138  53.998  1.00  0.00           H  
ATOM   2502  HA3 GLY C 157      47.317  29.728  55.544  1.00  0.00           H  
ATOM   2503  C   GLY C 157      45.796  29.396  54.100  1.00  0.00           C  
ATOM   2504  O   GLY C 157      45.557  28.202  53.919  1.00  0.00           O  
ATOM   2505  N   LYS C 158      44.850  30.335  53.973  1.00  0.00           N  
ATOM   2506  H   LYS C 158      45.119  31.284  54.211  1.00  0.00           H  
ATOM   2507  CA  LYS C 158      43.419  30.061  53.767  1.00  0.00           C  
ATOM   2508  HA  LYS C 158      43.293  29.025  53.449  1.00  0.00           H  
ATOM   2509  CB  LYS C 158      42.706  30.223  55.126  1.00  0.00           C  
ATOM   2510  HB2 LYS C 158      43.319  29.762  55.903  1.00  0.00           H  
ATOM   2511  HB3 LYS C 158      42.609  31.283  55.365  1.00  0.00           H  
ATOM   2512  CG  LYS C 158      41.326  29.549  55.165  1.00  0.00           C  
ATOM   2513  HG2 LYS C 158      40.718  29.893  54.327  1.00  0.00           H  
ATOM   2514  HG3 LYS C 158      41.455  28.468  55.090  1.00  0.00           H  
ATOM   2515  CD  LYS C 158      40.612  29.887  56.483  1.00  0.00           C  
ATOM   2516  HD2 LYS C 158      41.250  29.610  57.325  1.00  0.00           H  
ATOM   2517  HD3 LYS C 158      40.424  30.962  56.515  1.00  0.00           H  
ATOM   2518  CE  LYS C 158      39.286  29.130  56.587  1.00  0.00           C  
ATOM   2519  HE2 LYS C 158      38.696  29.327  55.687  1.00  0.00           H  
ATOM   2520  HE3 LYS C 158      39.499  28.060  56.627  1.00  0.00           H  
ATOM   2521  NZ  LYS C 158      38.524  29.544  57.788  1.00  0.00           N  
ATOM   2522  HZ1 LYS C 158      38.261  30.529  57.727  1.00  0.00           H  
ATOM   2523  HZ2 LYS C 158      37.696  28.980  57.918  1.00  0.00           H  
ATOM   2524  HZ3 LYS C 158      39.084  29.476  58.633  1.00  0.00           H  
ATOM   2525  C   LYS C 158      42.851  30.950  52.652  1.00  0.00           C  
ATOM   2526  O   LYS C 158      42.274  31.999  52.920  1.00  0.00           O  
ATOM   2527  N   ILE C 159      43.090  30.533  51.403  1.00  0.00           N  
ATOM   2528  H   ILE C 159      43.669  29.716  51.306  1.00  0.00           H  
ATOM   2529  CA  ILE C 159      42.595  31.166  50.163  1.00  0.00           C  
ATOM   2530  HA  ILE C 159      43.212  32.037  49.943  1.00  0.00           H  
ATOM   2531  CB  ILE C 159      42.682  30.172  48.974  1.00  0.00           C  
ATOM   2532  HB  ILE C 159      42.043  29.320  49.213  1.00  0.00           H  
ATOM   2533  CG2 ILE C 159      42.136  30.784  47.669  1.00  0.00           C  
ATOM   2534 1HG2 ILE C 159      42.631  31.730  47.450  1.00  0.00           H  
ATOM   2535 2HG2 ILE C 159      42.288  30.090  46.844  1.00  0.00           H  
ATOM   2536 3HG2 ILE C 159      41.061  30.958  47.746  1.00  0.00           H  
ATOM   2537  CG1 ILE C 159      44.098  29.602  48.727  1.00  0.00           C  
ATOM   2538 2HG1 ILE C 159      44.402  29.010  49.590  1.00  0.00           H  
ATOM   2539 3HG1 ILE C 159      44.054  28.921  47.876  1.00  0.00           H  
ATOM   2540  CD1 ILE C 159      45.187  30.646  48.450  1.00  0.00           C  
ATOM   2541 1HD1 ILE C 159      45.322  31.286  49.321  1.00  0.00           H  
ATOM   2542 2HD1 ILE C 159      46.128  30.135  48.243  1.00  0.00           H  
ATOM   2543 3HD1 ILE C 159      44.923  31.254  47.585  1.00  0.00           H  
ATOM   2544  C   ILE C 159      41.137  31.629  50.290  1.00  0.00           C  
ATOM   2545  O   ILE C 159      40.281  30.848  50.706  1.00  0.00           O  
ATOM   2546  N   ILE C 160      40.867  32.855  49.835  1.00  0.00           N  
ATOM   2547  H   ILE C 160      41.644  33.409  49.490  1.00  0.00           H  
ATOM   2548  CA  ILE C 160      39.519  33.403  49.635  1.00  0.00           C  
ATOM   2549  HA  ILE C 160      38.783  32.698  50.022  1.00  0.00           H  
ATOM   2550  CB  ILE C 160      39.352  34.733  50.409  1.00  0.00           C  
ATOM   2551  HB  ILE C 160      40.192  35.383  50.158  1.00  0.00           H  
ATOM   2552  CG2 ILE C 160      38.051  35.461  50.015  1.00  0.00           C  
ATOM   2553 1HG2 ILE C 160      37.193  34.815  50.216  1.00  0.00           H  
ATOM   2554 2HG2 ILE C 160      37.938  36.388  50.573  1.00  0.00           H  
ATOM   2555 3HG2 ILE C 160      38.058  35.721  48.956  1.00  0.00           H  
ATOM   2556  CG1 ILE C 160      39.384  34.446  51.928  1.00  0.00           C  
ATOM   2557 2HG1 ILE C 160      38.521  33.833  52.196  1.00  0.00           H  
ATOM   2558 3HG1 ILE C 160      40.282  33.876  52.169  1.00  0.00           H  
ATOM   2559  CD1 ILE C 160      39.399  35.697  52.816  1.00  0.00           C  
ATOM   2560 1HD1 ILE C 160      38.454  36.234  52.740  1.00  0.00           H  
ATOM   2561 2HD1 ILE C 160      39.540  35.396  53.853  1.00  0.00           H  
ATOM   2562 3HD1 ILE C 160      40.221  36.351  52.521  1.00  0.00           H  
ATOM   2563  C   ILE C 160      39.266  33.567  48.134  1.00  0.00           C  
ATOM   2564  O   ILE C 160      40.103  34.121  47.421  1.00  0.00           O  
ATOM   2565  N   HIS C 161      38.106  33.135  47.646  1.00  0.00           N  
ATOM   2566  H   HIS C 161      37.470  32.670  48.296  1.00  0.00           H  
ATOM   2567  CA  HIS C 161      37.685  33.332  46.254  1.00  0.00           C  
ATOM   2568  HA  HIS C 161      38.573  33.438  45.628  1.00  0.00           H  
ATOM   2569  CB  HIS C 161      36.926  32.102  45.741  1.00  0.00           C  
ATOM   2570  HB2 HIS C 161      36.006  31.982  46.306  1.00  0.00           H  
ATOM   2571  HB3 HIS C 161      36.655  32.285  44.705  1.00  0.00           H  
ATOM   2572  CG  HIS C 161      37.697  30.807  45.789  1.00  0.00           C  
ATOM   2573  ND1 HIS C 161      38.263  30.170  44.684  1.00  0.00           N  
ATOM   2574  CE1 HIS C 161      38.816  29.043  45.151  1.00  0.00           C  
ATOM   2575  HE1 HIS C 161      39.341  28.320  44.540  1.00  0.00           H  
ATOM   2576  NE2 HIS C 161      38.628  28.941  46.478  1.00  0.00           N  
ATOM   2577  HE2 HIS C 161      38.963  28.191  47.065  1.00  0.00           H  
ATOM   2578  CD2 HIS C 161      37.916  30.042  46.898  1.00  0.00           C  
ATOM   2579  HD2 HIS C 161      37.593  30.275  47.907  1.00  0.00           H  
ATOM   2580  C   HIS C 161      36.854  34.615  46.094  1.00  0.00           C  
ATOM   2581  O   HIS C 161      36.009  34.932  46.940  1.00  0.00           O  
ATOM   2582  N   LYS C 162      37.065  35.351  44.994  1.00  0.00           N  
ATOM   2583  H   LYS C 162      37.804  35.053  44.359  1.00  0.00           H  
ATOM   2584  CA  LYS C 162      36.339  36.589  44.658  1.00  0.00           C  
ATOM   2585  HA  LYS C 162      35.445  36.628  45.277  1.00  0.00           H  
ATOM   2586  CB  LYS C 162      37.187  37.839  44.967  1.00  0.00           C  
ATOM   2587  HB2 LYS C 162      38.038  37.881  44.284  1.00  0.00           H  
ATOM   2588  HB3 LYS C 162      36.566  38.720  44.792  1.00  0.00           H  
ATOM   2589  CG  LYS C 162      37.708  37.871  46.411  1.00  0.00           C  
ATOM   2590  HG2 LYS C 162      36.910  37.563  47.086  1.00  0.00           H  
ATOM   2591  HG3 LYS C 162      38.541  37.173  46.511  1.00  0.00           H  
ATOM   2592  CD  LYS C 162      38.166  39.274  46.818  1.00  0.00           C  
ATOM   2593  HD2 LYS C 162      38.947  39.631  46.145  1.00  0.00           H  
ATOM   2594  HD3 LYS C 162      37.310  39.951  46.769  1.00  0.00           H  
ATOM   2595  CE  LYS C 162      38.700  39.218  48.252  1.00  0.00           C  
ATOM   2596  HE2 LYS C 162      38.020  38.599  48.846  1.00  0.00           H  
ATOM   2597  HE3 LYS C 162      39.684  38.741  48.251  1.00  0.00           H  
ATOM   2598  NZ  LYS C 162      38.765  40.570  48.844  1.00  0.00           N  
ATOM   2599  HZ1 LYS C 162      37.841  41.000  48.823  1.00  0.00           H  
ATOM   2600  HZ2 LYS C 162      39.086  40.562  49.797  1.00  0.00           H  
ATOM   2601  HZ3 LYS C 162      39.371  41.197  48.307  1.00  0.00           H  
ATOM   2602  C   LYS C 162      35.872  36.619  43.201  1.00  0.00           C  
ATOM   2603  O   LYS C 162      36.587  36.184  42.303  1.00  0.00           O  
ATOM   2604  N   ILE C 163      34.688  37.181  42.968  1.00  0.00           N  
ATOM   2605  H   ILE C 163      34.150  37.481  43.774  1.00  0.00           H  
ATOM   2606  CA  ILE C 163      34.104  37.406  41.638  1.00  0.00           C  
ATOM   2607  HA  ILE C 163      34.367  36.562  40.997  1.00  0.00           H  
ATOM   2608  CB  ILE C 163      32.557  37.462  41.737  1.00  0.00           C  
ATOM   2609  HB  ILE C 163      32.291  38.297  42.388  1.00  0.00           H  
ATOM   2610  CG2 ILE C 163      31.925  37.714  40.355  1.00  0.00           C  
ATOM   2611 1HG2 ILE C 163      32.208  36.921  39.660  1.00  0.00           H  
ATOM   2612 2HG2 ILE C 163      30.840  37.754  40.428  1.00  0.00           H  
ATOM   2613 3HG2 ILE C 163      32.251  38.672  39.951  1.00  0.00           H  
ATOM   2614  CG1 ILE C 163      31.986  36.159  42.355  1.00  0.00           C  
ATOM   2615 2HG1 ILE C 163      32.200  35.323  41.689  1.00  0.00           H  
ATOM   2616 3HG1 ILE C 163      32.478  35.964  43.308  1.00  0.00           H  
ATOM   2617  CD1 ILE C 163      30.479  36.185  42.648  1.00  0.00           C  
ATOM   2618 1HD1 ILE C 163      29.906  36.192  41.721  1.00  0.00           H  
ATOM   2619 2HD1 ILE C 163      30.208  35.291  43.211  1.00  0.00           H  
ATOM   2620 3HD1 ILE C 163      30.229  37.065  43.242  1.00  0.00           H  
ATOM   2621  C   ILE C 163      34.698  38.677  41.002  1.00  0.00           C  
ATOM   2622  O   ILE C 163      34.864  39.692  41.688  1.00  0.00           O  
ATOM   2623  N   ILE C 164      34.975  38.616  39.694  1.00  0.00           N  
ATOM   2624  H   ILE C 164      34.790  37.739  39.215  1.00  0.00           H  
ATOM   2625  CA  ILE C 164      35.436  39.721  38.831  1.00  0.00           C  
ATOM   2626  HA  ILE C 164      35.315  40.664  39.366  1.00  0.00           H  
ATOM   2627  CB  ILE C 164      36.942  39.573  38.481  1.00  0.00           C  
ATOM   2628  HB  ILE C 164      37.210  40.353  37.766  1.00  0.00           H  
ATOM   2629  CG2 ILE C 164      37.812  39.813  39.720  1.00  0.00           C  
ATOM   2630 1HG2 ILE C 164      37.546  39.115  40.512  1.00  0.00           H  
ATOM   2631 2HG2 ILE C 164      38.868  39.700  39.475  1.00  0.00           H  
ATOM   2632 3HG2 ILE C 164      37.648  40.828  40.070  1.00  0.00           H  
ATOM   2633  CG1 ILE C 164      37.250  38.211  37.829  1.00  0.00           C  
ATOM   2634 2HG1 ILE C 164      37.289  37.440  38.600  1.00  0.00           H  
ATOM   2635 3HG1 ILE C 164      36.448  37.971  37.134  1.00  0.00           H  
ATOM   2636  CD1 ILE C 164      38.550  38.182  37.024  1.00  0.00           C  
ATOM   2637 1HD1 ILE C 164      39.397  38.474  37.641  1.00  0.00           H  
ATOM   2638 2HD1 ILE C 164      38.715  37.172  36.649  1.00  0.00           H  
ATOM   2639 3HD1 ILE C 164      38.462  38.862  36.179  1.00  0.00           H  
ATOM   2640  C   ILE C 164      34.580  39.839  37.552  1.00  0.00           C  
ATOM   2641  O   ILE C 164      33.639  39.071  37.335  1.00  0.00           O  
ATOM   2642  N   ASP C 165      34.918  40.829  36.724  1.00  0.00           N  
ATOM   2643  H   ASP C 165      35.652  41.451  37.050  1.00  0.00           H  
ATOM   2644  CA  ASP C 165      34.286  41.234  35.465  1.00  0.00           C  
ATOM   2645  HA  ASP C 165      34.622  42.256  35.300  1.00  0.00           H  
ATOM   2646  CB  ASP C 165      34.822  40.468  34.252  1.00  0.00           C  
ATOM   2647  HB2 ASP C 165      35.895  40.318  34.366  1.00  0.00           H  
ATOM   2648  HB3 ASP C 165      34.350  39.489  34.203  1.00  0.00           H  
ATOM   2649  CG  ASP C 165      34.547  41.247  32.955  1.00  0.00           C  
ATOM   2650  OD1 ASP C 165      33.551  42.006  32.874  1.00  0.00           O  
ATOM   2651  OD2 ASP C 165      35.313  41.102  31.981  1.00  0.00           O  
ATOM   2652  C   ASP C 165      32.757  41.309  35.541  1.00  0.00           C  
ATOM   2653  O   ASP C 165      32.014  40.392  35.173  1.00  0.00           O  
ATOM   2654  N   LEU C 166      32.301  42.462  36.025  1.00  0.00           N  
ATOM   2655  H   LEU C 166      32.996  43.174  36.242  1.00  0.00           H  
ATOM   2656  CA  LEU C 166      30.888  42.805  36.190  1.00  0.00           C  
ATOM   2657  HA  LEU C 166      30.318  41.880  36.290  1.00  0.00           H  
ATOM   2658  CB  LEU C 166      30.714  43.612  37.491  1.00  0.00           C  
ATOM   2659  HB2 LEU C 166      31.092  44.620  37.323  1.00  0.00           H  
ATOM   2660  HB3 LEU C 166      29.646  43.687  37.699  1.00  0.00           H  
ATOM   2661  CG  LEU C 166      31.427  43.033  38.733  1.00  0.00           C  
ATOM   2662  HG  LEU C 166      32.506  43.043  38.578  1.00  0.00           H  
ATOM   2663  CD1 LEU C 166      31.119  43.909  39.943  1.00  0.00           C  
ATOM   2664 1HD1 LEU C 166      30.055  43.857  40.159  1.00  0.00           H  
ATOM   2665 2HD1 LEU C 166      31.685  43.555  40.804  1.00  0.00           H  
ATOM   2666 3HD1 LEU C 166      31.406  44.939  39.733  1.00  0.00           H  
ATOM   2667  CD2 LEU C 166      30.988  41.604  39.063  1.00  0.00           C  
ATOM   2668 1HD2 LEU C 166      31.291  40.936  38.257  1.00  0.00           H  
ATOM   2669 2HD2 LEU C 166      31.477  41.272  39.979  1.00  0.00           H  
ATOM   2670 3HD2 LEU C 166      29.907  41.565  39.189  1.00  0.00           H  
ATOM   2671  C   LEU C 166      30.326  43.528  34.951  1.00  0.00           C  
ATOM   2672  O   LEU C 166      29.256  44.135  35.007  1.00  0.00           O  
ATOM   2673  N   GLY C 167      31.056  43.506  33.832  1.00  0.00           N  
ATOM   2674  H   GLY C 167      31.918  42.965  33.832  1.00  0.00           H  
ATOM   2675  CA  GLY C 167      30.758  44.290  32.637  1.00  0.00           C  
ATOM   2676  HA2 GLY C 167      30.626  45.335  32.915  1.00  0.00           H  
ATOM   2677  HA3 GLY C 167      31.626  44.216  31.993  1.00  0.00           H  
ATOM   2678  C   GLY C 167      29.522  43.853  31.839  1.00  0.00           C  
ATOM   2679  O   GLY C 167      29.041  44.629  31.015  1.00  0.00           O  
ATOM   2680  N   TYR C 168      28.983  42.655  32.089  1.00  0.00           N  
ATOM   2681  H   TYR C 168      29.442  42.053  32.768  1.00  0.00           H  
ATOM   2682  CA  TYR C 168      27.715  42.167  31.525  1.00  0.00           C  
ATOM   2683  HA  TYR C 168      27.308  42.938  30.873  1.00  0.00           H  
ATOM   2684  CB  TYR C 168      28.004  40.927  30.656  1.00  0.00           C  
ATOM   2685  HB2 TYR C 168      28.837  41.161  29.993  1.00  0.00           H  
ATOM   2686  HB3 TYR C 168      28.324  40.115  31.309  1.00  0.00           H  
ATOM   2687  CG  TYR C 168      26.854  40.452  29.779  1.00  0.00           C  
ATOM   2688  CD1 TYR C 168      26.446  39.102  29.814  1.00  0.00           C  
ATOM   2689  HD1 TYR C 168      26.955  38.402  30.463  1.00  0.00           H  
ATOM   2690  CE1 TYR C 168      25.386  38.655  28.997  1.00  0.00           C  
ATOM   2691  HE1 TYR C 168      25.080  37.621  29.021  1.00  0.00           H  
ATOM   2692  CZ  TYR C 168      24.751  39.562  28.120  1.00  0.00           C  
ATOM   2693  OH  TYR C 168      23.745  39.171  27.302  1.00  0.00           O  
ATOM   2694  HH  TYR C 168      23.322  38.336  27.521  1.00  0.00           H  
ATOM   2695  CE2 TYR C 168      25.163  40.908  28.079  1.00  0.00           C  
ATOM   2696  HE2 TYR C 168      24.651  41.592  27.416  1.00  0.00           H  
ATOM   2697  CD2 TYR C 168      26.211  41.354  28.905  1.00  0.00           C  
ATOM   2698  HD2 TYR C 168      26.515  42.391  28.862  1.00  0.00           H  
ATOM   2699  C   TYR C 168      26.636  41.925  32.603  1.00  0.00           C  
ATOM   2700  O   TYR C 168      25.506  41.541  32.285  1.00  0.00           O  
ATOM   2701  N   ALA C 169      26.949  42.182  33.877  1.00  0.00           N  
ATOM   2702  H   ALA C 169      27.881  42.518  34.080  1.00  0.00           H  
ATOM   2703  CA  ALA C 169      26.031  42.029  35.002  1.00  0.00           C  
ATOM   2704  HA  ALA C 169      25.605  41.028  34.943  1.00  0.00           H  
ATOM   2705  CB  ALA C 169      26.826  42.154  36.306  1.00  0.00           C  
ATOM   2706  HB1 ALA C 169      27.228  43.163  36.396  1.00  0.00           H  
ATOM   2707  HB2 ALA C 169      26.173  41.958  37.155  1.00  0.00           H  
ATOM   2708  HB3 ALA C 169      27.648  41.437  36.309  1.00  0.00           H  
ATOM   2709  C   ALA C 169      24.883  43.050  34.944  1.00  0.00           C  
ATOM   2710  O   ALA C 169      25.074  44.174  34.486  1.00  0.00           O  
ATOM   2711  N   LYS C 170      23.683  42.697  35.412  1.00  0.00           N  
ATOM   2712  H   LYS C 170      23.592  41.787  35.859  1.00  0.00           H  
ATOM   2713  CA  LYS C 170      22.484  43.538  35.262  1.00  0.00           C  
ATOM   2714  HA  LYS C 170      22.790  44.585  35.205  1.00  0.00           H  
ATOM   2715  CB  LYS C 170      21.803  43.173  33.931  1.00  0.00           C  
ATOM   2716  HB2 LYS C 170      22.558  43.240  33.146  1.00  0.00           H  
ATOM   2717  HB3 LYS C 170      21.452  42.140  33.976  1.00  0.00           H  
ATOM   2718  CG  LYS C 170      20.630  44.085  33.537  1.00  0.00           C  
ATOM   2719  HG2 LYS C 170      19.782  43.887  34.190  1.00  0.00           H  
ATOM   2720  HG3 LYS C 170      20.927  45.130  33.637  1.00  0.00           H  
ATOM   2721  CD  LYS C 170      20.223  43.812  32.082  1.00  0.00           C  
ATOM   2722  HD2 LYS C 170      21.081  44.018  31.442  1.00  0.00           H  
ATOM   2723  HD3 LYS C 170      19.942  42.762  31.974  1.00  0.00           H  
ATOM   2724  CE  LYS C 170      19.058  44.701  31.635  1.00  0.00           C  
ATOM   2725  HE2 LYS C 170      18.207  44.543  32.303  1.00  0.00           H  
ATOM   2726  HE3 LYS C 170      19.363  45.747  31.734  1.00  0.00           H  
ATOM   2727  NZ  LYS C 170      18.662  44.427  30.230  1.00  0.00           N  
ATOM   2728  HZ1 LYS C 170      18.288  43.498  30.126  1.00  0.00           H  
ATOM   2729  HZ2 LYS C 170      17.985  45.102  29.900  1.00  0.00           H  
ATOM   2730  HZ3 LYS C 170      19.453  44.468  29.581  1.00  0.00           H  
ATOM   2731  C   LYS C 170      21.548  43.418  36.460  1.00  0.00           C  
ATOM   2732  O   LYS C 170      21.355  42.330  36.997  1.00  0.00           O  
ATOM   2733  N   ASP C 171      20.971  44.544  36.859  1.00  0.00           N  
ATOM   2734  H   ASP C 171      21.204  45.406  36.379  1.00  0.00           H  
ATOM   2735  CA  ASP C 171      19.873  44.631  37.818  1.00  0.00           C  
ATOM   2736  HA  ASP C 171      20.112  44.022  38.688  1.00  0.00           H  
ATOM   2737  CB  ASP C 171      19.691  46.087  38.295  1.00  0.00           C  
ATOM   2738  HB2 ASP C 171      18.727  46.180  38.799  1.00  0.00           H  
ATOM   2739  HB3 ASP C 171      20.465  46.300  39.034  1.00  0.00           H  
ATOM   2740  CG  ASP C 171      19.803  47.134  37.173  1.00  0.00           C  
ATOM   2741  OD1 ASP C 171      20.915  47.320  36.626  1.00  0.00           O  
ATOM   2742  OD2 ASP C 171      18.788  47.779  36.824  1.00  0.00           O  
ATOM   2743  C   ASP C 171      18.581  44.088  37.189  1.00  0.00           C  
ATOM   2744  O   ASP C 171      18.186  44.508  36.097  1.00  0.00           O  
ATOM   2745  N   VAL C 172      17.921  43.160  37.882  1.00  0.00           N  
ATOM   2746  H   VAL C 172      18.277  42.902  38.800  1.00  0.00           H  
ATOM   2747  CA  VAL C 172      16.656  42.544  37.454  1.00  0.00           C  
ATOM   2748  HA  VAL C 172      16.427  42.888  36.447  1.00  0.00           H  
ATOM   2749  CB  VAL C 172      16.728  41.007  37.384  1.00  0.00           C  
ATOM   2750  HB  VAL C 172      15.743  40.633  37.104  1.00  0.00           H  
ATOM   2751  CG1 VAL C 172      17.711  40.576  36.293  1.00  0.00           C  
ATOM   2752 1HG1 VAL C 172      18.713  40.922  36.543  1.00  0.00           H  
ATOM   2753 2HG1 VAL C 172      17.706  39.492  36.202  1.00  0.00           H  
ATOM   2754 3HG1 VAL C 172      17.412  41.017  35.342  1.00  0.00           H  
ATOM   2755  CG2 VAL C 172      17.128  40.335  38.705  1.00  0.00           C  
ATOM   2756 1HG2 VAL C 172      16.442  40.631  39.499  1.00  0.00           H  
ATOM   2757 2HG2 VAL C 172      17.087  39.255  38.591  1.00  0.00           H  
ATOM   2758 3HG2 VAL C 172      18.142  40.619  38.982  1.00  0.00           H  
ATOM   2759  C   VAL C 172      15.500  43.002  38.333  1.00  0.00           C  
ATOM   2760  O   VAL C 172      15.662  43.247  39.528  1.00  0.00           O  
ATOM   2761  N   ASP C 173      14.315  43.100  37.735  1.00  0.00           N  
ATOM   2762  H   ASP C 173      14.220  42.809  36.772  1.00  0.00           H  
ATOM   2763  CA  ASP C 173      13.112  43.572  38.410  1.00  0.00           C  
ATOM   2764  HA  ASP C 173      13.337  43.677  39.473  1.00  0.00           H  
ATOM   2765  CB  ASP C 173      12.732  44.965  37.888  1.00  0.00           C  
ATOM   2766  HB2 ASP C 173      13.621  45.599  37.885  1.00  0.00           H  
ATOM   2767  HB3 ASP C 173      12.366  44.880  36.862  1.00  0.00           H  
ATOM   2768  CG  ASP C 173      11.675  45.628  38.770  1.00  0.00           C  
ATOM   2769  OD1 ASP C 173      10.858  46.418  38.246  1.00  0.00           O  
ATOM   2770  OD2 ASP C 173      11.626  45.333  39.989  1.00  0.00           O  
ATOM   2771  C   ASP C 173      11.967  42.553  38.311  1.00  0.00           C  
ATOM   2772  O   ASP C 173      11.938  41.685  37.444  1.00  0.00           O  
ATOM   2773  N   GLN C 174      11.027  42.630  39.249  1.00  0.00           N  
ATOM   2774  H   GLN C 174      11.067  43.441  39.860  1.00  0.00           H  
ATOM   2775  CA  GLN C 174      10.156  41.509  39.628  1.00  0.00           C  
ATOM   2776  HA  GLN C 174      10.788  40.640  39.818  1.00  0.00           H  
ATOM   2777  CB  GLN C 174       9.383  41.850  40.908  1.00  0.00           C  
ATOM   2778  HB2 GLN C 174       8.483  42.405  40.634  1.00  0.00           H  
ATOM   2779  HB3 GLN C 174       9.071  40.908  41.362  1.00  0.00           H  
ATOM   2780  CG  GLN C 174      10.134  42.687  41.951  1.00  0.00           C  
ATOM   2781  HG2 GLN C 174      11.055  42.187  42.249  1.00  0.00           H  
ATOM   2782  HG3 GLN C 174      10.379  43.656  41.524  1.00  0.00           H  
ATOM   2783  CD  GLN C 174       9.262  42.920  43.174  1.00  0.00           C  
ATOM   2784  OE1 GLN C 174       8.577  42.030  43.653  1.00  0.00           O  
ATOM   2785  NE2 GLN C 174       9.248  44.116  43.712  1.00  0.00           N  
ATOM   2786 1HE2 GLN C 174       8.514  44.265  44.397  1.00  0.00           H  
ATOM   2787 2HE2 GLN C 174       9.699  44.896  43.244  1.00  0.00           H  
ATOM   2788  C   GLN C 174       9.120  41.099  38.574  1.00  0.00           C  
ATOM   2789  O   GLN C 174       8.520  40.031  38.691  1.00  0.00           O  
ATOM   2790  N   GLY C 175       8.828  41.974  37.612  1.00  0.00           N  
ATOM   2791  H   GLY C 175       9.385  42.813  37.555  1.00  0.00           H  
ATOM   2792  CA  GLY C 175       7.838  41.724  36.562  1.00  0.00           C  
ATOM   2793  HA2 GLY C 175       7.046  41.069  36.925  1.00  0.00           H  
ATOM   2794  HA3 GLY C 175       7.396  42.678  36.277  1.00  0.00           H  
ATOM   2795  C   GLY C 175       8.432  41.120  35.296  1.00  0.00           C  
ATOM   2796  O   GLY C 175       7.712  40.476  34.532  1.00  0.00           O  
ATOM   2797  N   SER C 176       9.723  41.355  35.057  1.00  0.00           N  
ATOM   2798  H   SER C 176      10.303  41.719  35.802  1.00  0.00           H  
ATOM   2799  CA  SER C 176      10.308  41.391  33.716  1.00  0.00           C  
ATOM   2800  HA  SER C 176       9.527  41.153  32.995  1.00  0.00           H  
ATOM   2801  CB  SER C 176      10.757  42.828  33.420  1.00  0.00           C  
ATOM   2802  HB2 SER C 176      10.219  43.508  34.083  1.00  0.00           H  
ATOM   2803  HB3 SER C 176      11.826  42.940  33.596  1.00  0.00           H  
ATOM   2804  OG  SER C 176      10.445  43.156  32.081  1.00  0.00           O  
ATOM   2805  PS  SER C 176      10.011  44.630  31.656  1.00  0.00           P  
ATOM   2806  OPA SER C 176       8.668  44.793  32.255  1.00  0.00           O  
ATOM   2807  OPB SER C 176      11.038  45.515  32.235  1.00  0.00           O  
ATOM   2808  OPC SER C 176       9.996  44.578  30.184  1.00  0.00           O  
ATOM   2809  C   SER C 176      11.408  40.347  33.534  1.00  0.00           C  
ATOM   2810  O   SER C 176      12.041  39.886  34.486  1.00  0.00           O  
ATOM   2811  N   LEU C 177      11.587  39.934  32.284  1.00  0.00           N  
ATOM   2812  H   LEU C 177      11.096  40.446  31.566  1.00  0.00           H  
ATOM   2813  CA  LEU C 177      12.539  38.902  31.875  1.00  0.00           C  
ATOM   2814  HA  LEU C 177      13.048  38.506  32.755  1.00  0.00           H  
ATOM   2815  CB  LEU C 177      11.804  37.741  31.181  1.00  0.00           C  
ATOM   2816  HB2 LEU C 177      11.294  38.140  30.303  1.00  0.00           H  
ATOM   2817  HB3 LEU C 177      12.548  37.023  30.840  1.00  0.00           H  
ATOM   2818  CG  LEU C 177      10.772  36.997  32.052  1.00  0.00           C  
ATOM   2819  HG  LEU C 177      10.011  37.697  32.399  1.00  0.00           H  
ATOM   2820  CD1 LEU C 177      10.082  35.920  31.213  1.00  0.00           C  
ATOM   2821 1HD1 LEU C 177      10.814  35.191  30.862  1.00  0.00           H  
ATOM   2822 2HD1 LEU C 177       9.328  35.413  31.813  1.00  0.00           H  
ATOM   2823 3HD1 LEU C 177       9.595  36.383  30.355  1.00  0.00           H  
ATOM   2824  CD2 LEU C 177      11.401  36.309  33.266  1.00  0.00           C  
ATOM   2825 1HD2 LEU C 177      11.819  37.058  33.938  1.00  0.00           H  
ATOM   2826 2HD2 LEU C 177      10.638  35.754  33.809  1.00  0.00           H  
ATOM   2827 3HD2 LEU C 177      12.188  35.631  32.940  1.00  0.00           H  
ATOM   2828  C   LEU C 177      13.611  39.519  30.979  1.00  0.00           C  
ATOM   2829  O   LEU C 177      13.333  40.391  30.158  1.00  0.00           O  
ATOM   2830  N   CYS C 178      14.847  39.049  31.117  1.00  0.00           N  
ATOM   2831  H   CYS C 178      14.996  38.260  31.735  1.00  0.00           H  
ATOM   2832  CA  CYS C 178      15.965  39.554  30.326  1.00  0.00           C  
ATOM   2833  HA  CYS C 178      15.862  40.636  30.227  1.00  0.00           H  
ATOM   2834  CB  CYS C 178      17.266  39.260  31.074  1.00  0.00           C  
ATOM   2835  HB2 CYS C 178      17.182  38.277  31.538  1.00  0.00           H  
ATOM   2836  HB3 CYS C 178      18.099  39.260  30.370  1.00  0.00           H  
ATOM   2837  SG  CYS C 178      17.558  40.524  32.344  1.00  0.00           S  
ATOM   2838  HG  CYS C 178      18.300  39.777  33.168  1.00  0.00           H  
ATOM   2839  C   CYS C 178      15.960  38.963  28.907  1.00  0.00           C  
ATOM   2840  O   CYS C 178      15.604  37.800  28.715  1.00  0.00           O  
ATOM   2841  N   THR C 179      16.382  39.761  27.921  1.00  0.00           N  
ATOM   2842  H   THR C 179      16.576  40.729  28.128  1.00  0.00           H  
ATOM   2843  CA  THR C 179      16.353  39.404  26.487  1.00  0.00           C  
ATOM   2844  HA  THR C 179      16.107  38.348  26.394  1.00  0.00           H  
ATOM   2845  CB  THR C 179      15.251  40.182  25.746  1.00  0.00           C  
ATOM   2846  HB  THR C 179      15.275  39.911  24.691  1.00  0.00           H  
ATOM   2847  CG2 THR C 179      13.858  39.861  26.292  1.00  0.00           C  
ATOM   2848 1HG2 THR C 179      13.754  40.233  27.312  1.00  0.00           H  
ATOM   2849 2HG2 THR C 179      13.104  40.336  25.665  1.00  0.00           H  
ATOM   2850 3HG2 THR C 179      13.708  38.784  26.286  1.00  0.00           H  
ATOM   2851  OG1 THR C 179      15.419  41.576  25.864  1.00  0.00           O  
ATOM   2852  HG1 THR C 179      15.060  41.947  25.036  1.00  0.00           H  
ATOM   2853  C   THR C 179      17.701  39.552  25.767  1.00  0.00           C  
ATOM   2854  O   THR C 179      17.789  39.300  24.566  1.00  0.00           O  
ATOM   2855  N   SER C 180      18.773  39.905  26.487  1.00  0.00           N  
ATOM   2856  H   SER C 180      18.646  40.153  27.452  1.00  0.00           H  
ATOM   2857  CA  SER C 180      20.133  40.026  25.944  1.00  0.00           C  
ATOM   2858  HA  SER C 180      20.060  40.458  24.946  1.00  0.00           H  
ATOM   2859  CB  SER C 180      20.954  41.016  26.779  1.00  0.00           C  
ATOM   2860  HB2 SER C 180      21.166  40.562  27.740  1.00  0.00           H  
ATOM   2861  HB3 SER C 180      21.890  41.219  26.261  1.00  0.00           H  
ATOM   2862  OG  SER C 180      20.239  42.225  26.980  1.00  0.00           O  
ATOM   2863  PS  SER C 180      20.856  43.460  27.765  1.00  0.00           P  
ATOM   2864  OPA SER C 180      19.822  44.509  27.702  1.00  0.00           O  
ATOM   2865  OPB SER C 180      21.057  42.980  29.139  1.00  0.00           O  
ATOM   2866  OPC SER C 180      22.087  43.838  27.051  1.00  0.00           O  
ATOM   2867  C   SER C 180      20.800  38.646  25.818  1.00  0.00           C  
ATOM   2868  O   SER C 180      21.273  38.045  26.786  1.00  0.00           O  
ATOM   2869  N   PHE C 181      20.823  38.113  24.595  1.00  0.00           N  
ATOM   2870  H   PHE C 181      20.297  38.605  23.888  1.00  0.00           H  
ATOM   2871  CA  PHE C 181      21.301  36.752  24.291  1.00  0.00           C  
ATOM   2872  HA  PHE C 181      21.175  36.147  25.188  1.00  0.00           H  
ATOM   2873  CB  PHE C 181      20.411  36.122  23.202  1.00  0.00           C  
ATOM   2874  HB2 PHE C 181      20.587  36.649  22.263  1.00  0.00           H  
ATOM   2875  HB3 PHE C 181      20.714  35.084  23.055  1.00  0.00           H  
ATOM   2876  CG  PHE C 181      18.920  36.126  23.507  1.00  0.00           C  
ATOM   2877  CD1 PHE C 181      18.446  35.601  24.723  1.00  0.00           C  
ATOM   2878  HD1 PHE C 181      19.136  35.181  25.435  1.00  0.00           H  
ATOM   2879  CE1 PHE C 181      17.075  35.639  25.025  1.00  0.00           C  
ATOM   2880  HE1 PHE C 181      16.723  35.255  25.970  1.00  0.00           H  
ATOM   2881  CZ  PHE C 181      16.164  36.189  24.109  1.00  0.00           C  
ATOM   2882  HZ  PHE C 181      15.110  36.220  24.343  1.00  0.00           H  
ATOM   2883  CE2 PHE C 181      16.630  36.696  22.883  1.00  0.00           C  
ATOM   2884  HE2 PHE C 181      15.931  37.123  22.180  1.00  0.00           H  
ATOM   2885  CD2 PHE C 181      18.003  36.664  22.582  1.00  0.00           C  
ATOM   2886  HD2 PHE C 181      18.355  37.067  21.644  1.00  0.00           H  
ATOM   2887  C   PHE C 181      22.804  36.660  23.952  1.00  0.00           C  
ATOM   2888  O   PHE C 181      23.276  35.614  23.516  1.00  0.00           O  
ATOM   2889  N   VAL C 182      23.581  37.731  24.158  1.00  0.00           N  
ATOM   2890  H   VAL C 182      23.158  38.539  24.593  1.00  0.00           H  
ATOM   2891  CA  VAL C 182      24.977  37.862  23.674  1.00  0.00           C  
ATOM   2892  HA  VAL C 182      25.057  37.274  22.758  1.00  0.00           H  
ATOM   2893  CB  VAL C 182      25.301  39.320  23.281  1.00  0.00           C  
ATOM   2894  HB  VAL C 182      26.314  39.359  22.879  1.00  0.00           H  
ATOM   2895  CG1 VAL C 182      24.363  39.820  22.175  1.00  0.00           C  
ATOM   2896 1HG1 VAL C 182      23.336  39.881  22.537  1.00  0.00           H  
ATOM   2897 2HG1 VAL C 182      24.679  40.809  21.844  1.00  0.00           H  
ATOM   2898 3HG1 VAL C 182      24.403  39.140  21.323  1.00  0.00           H  
ATOM   2899  CG2 VAL C 182      25.221  40.291  24.466  1.00  0.00           C  
ATOM   2900 1HG2 VAL C 182      25.893  39.964  25.259  1.00  0.00           H  
ATOM   2901 2HG2 VAL C 182      25.520  41.288  24.147  1.00  0.00           H  
ATOM   2902 3HG2 VAL C 182      24.205  40.338  24.858  1.00  0.00           H  
ATOM   2903  C   VAL C 182      26.053  37.273  24.605  1.00  0.00           C  
ATOM   2904  O   VAL C 182      27.243  37.533  24.425  1.00  0.00           O  
ATOM   2905  N   GLY C 183      25.650  36.499  25.616  1.00  0.00           N  
ATOM   2906  H   GLY C 183      24.668  36.278  25.655  1.00  0.00           H  
ATOM   2907  CA  GLY C 183      26.552  35.856  26.575  1.00  0.00           C  
ATOM   2908  HA2 GLY C 183      27.389  36.523  26.786  1.00  0.00           H  
ATOM   2909  HA3 GLY C 183      26.018  35.704  27.510  1.00  0.00           H  
ATOM   2910  C   GLY C 183      27.126  34.506  26.114  1.00  0.00           C  
ATOM   2911  O   GLY C 183      26.826  33.992  25.036  1.00  0.00           O  
ATOM   2912  N   THR C 184      27.950  33.893  26.965  1.00  0.00           N  
ATOM   2913  H   THR C 184      28.145  34.358  27.847  1.00  0.00           H  
ATOM   2914  CA  THR C 184      28.654  32.629  26.688  1.00  0.00           C  
ATOM   2915  HA  THR C 184      29.102  32.698  25.696  1.00  0.00           H  
ATOM   2916  CB  THR C 184      29.790  32.390  27.708  1.00  0.00           C  
ATOM   2917  HB  THR C 184      29.367  32.123  28.677  1.00  0.00           H  
ATOM   2918  CG2 THR C 184      30.730  31.275  27.243  1.00  0.00           C  
ATOM   2919 1HG2 THR C 184      31.173  31.539  26.283  1.00  0.00           H  
ATOM   2920 2HG2 THR C 184      31.526  31.142  27.974  1.00  0.00           H  
ATOM   2921 3HG2 THR C 184      30.187  30.336  27.147  1.00  0.00           H  
ATOM   2922  OG1 THR C 184      30.583  33.538  27.896  1.00  0.00           O  
ATOM   2923  HG1 THR C 184      30.036  34.188  28.368  1.00  0.00           H  
ATOM   2924  C   THR C 184      27.689  31.437  26.703  1.00  0.00           C  
ATOM   2925  O   THR C 184      27.544  30.774  27.724  1.00  0.00           O  
ATOM   2926  N   LEU C 185      27.030  31.113  25.584  1.00  0.00           N  
ATOM   2927  H   LEU C 185      27.100  31.769  24.814  1.00  0.00           H  
ATOM   2928  CA  LEU C 185      25.914  30.145  25.562  1.00  0.00           C  
ATOM   2929  HA  LEU C 185      25.107  30.555  26.170  1.00  0.00           H  
ATOM   2930  CB  LEU C 185      25.388  29.975  24.124  1.00  0.00           C  
ATOM   2931  HB2 LEU C 185      26.186  29.563  23.505  1.00  0.00           H  
ATOM   2932  HB3 LEU C 185      24.580  29.244  24.151  1.00  0.00           H  
ATOM   2933  CG  LEU C 185      24.838  31.247  23.450  1.00  0.00           C  
ATOM   2934  HG  LEU C 185      25.637  31.983  23.364  1.00  0.00           H  
ATOM   2935  CD1 LEU C 185      24.354  30.891  22.044  1.00  0.00           C  
ATOM   2936 1HD1 LEU C 185      23.541  30.166  22.102  1.00  0.00           H  
ATOM   2937 2HD1 LEU C 185      23.992  31.792  21.546  1.00  0.00           H  
ATOM   2938 3HD1 LEU C 185      25.174  30.473  21.462  1.00  0.00           H  
ATOM   2939  CD2 LEU C 185      23.669  31.857  24.224  1.00  0.00           C  
ATOM   2940 1HD2 LEU C 185      24.009  32.229  25.188  1.00  0.00           H  
ATOM   2941 2HD2 LEU C 185      23.265  32.704  23.666  1.00  0.00           H  
ATOM   2942 3HD2 LEU C 185      22.884  31.115  24.366  1.00  0.00           H  
ATOM   2943  C   LEU C 185      26.220  28.759  26.172  1.00  0.00           C  
ATOM   2944  O   LEU C 185      25.329  28.156  26.758  1.00  0.00           O  
ATOM   2945  N   GLN C 186      27.461  28.260  26.117  1.00  0.00           N  
ATOM   2946  H   GLN C 186      28.170  28.814  25.667  1.00  0.00           H  
ATOM   2947  CA  GLN C 186      27.854  26.990  26.768  1.00  0.00           C  
ATOM   2948  HA  GLN C 186      27.049  26.266  26.627  1.00  0.00           H  
ATOM   2949  CB  GLN C 186      29.114  26.422  26.101  1.00  0.00           C  
ATOM   2950  HB2 GLN C 186      29.857  27.211  25.968  1.00  0.00           H  
ATOM   2951  HB3 GLN C 186      29.545  25.652  26.743  1.00  0.00           H  
ATOM   2952  CG  GLN C 186      28.774  25.774  24.757  1.00  0.00           C  
ATOM   2953  HG2 GLN C 186      27.985  25.035  24.897  1.00  0.00           H  
ATOM   2954  HG3 GLN C 186      28.421  26.532  24.059  1.00  0.00           H  
ATOM   2955  CD  GLN C 186      29.990  25.068  24.186  1.00  0.00           C  
ATOM   2956  OE1 GLN C 186      30.318  23.949  24.544  1.00  0.00           O  
ATOM   2957  NE2 GLN C 186      30.736  25.706  23.317  1.00  0.00           N  
ATOM   2958 1HE2 GLN C 186      31.429  25.125  22.846  1.00  0.00           H  
ATOM   2959 2HE2 GLN C 186      30.547  26.649  23.045  1.00  0.00           H  
ATOM   2960  C   GLN C 186      28.054  27.074  28.291  1.00  0.00           C  
ATOM   2961  O   GLN C 186      28.231  26.047  28.944  1.00  0.00           O  
ATOM   2962  N   TYR C 187      28.009  28.273  28.865  1.00  0.00           N  
ATOM   2963  H   TYR C 187      27.853  29.081  28.275  1.00  0.00           H  
ATOM   2964  CA  TYR C 187      28.068  28.523  30.306  1.00  0.00           C  
ATOM   2965  HA  TYR C 187      28.226  27.574  30.823  1.00  0.00           H  
ATOM   2966  CB  TYR C 187      29.265  29.437  30.621  1.00  0.00           C  
ATOM   2967  HB2 TYR C 187      29.807  29.688  29.708  1.00  0.00           H  
ATOM   2968  HB3 TYR C 187      28.916  30.377  31.053  1.00  0.00           H  
ATOM   2969  CG  TYR C 187      30.216  28.771  31.586  1.00  0.00           C  
ATOM   2970  CD1 TYR C 187      29.946  28.816  32.966  1.00  0.00           C  
ATOM   2971  HD1 TYR C 187      29.105  29.390  33.337  1.00  0.00           H  
ATOM   2972  CE1 TYR C 187      30.743  28.083  33.861  1.00  0.00           C  
ATOM   2973  HE1 TYR C 187      30.524  28.115  34.916  1.00  0.00           H  
ATOM   2974  CZ  TYR C 187      31.809  27.303  33.370  1.00  0.00           C  
ATOM   2975  OH  TYR C 187      32.537  26.545  34.221  1.00  0.00           O  
ATOM   2976  HH  TYR C 187      32.146  26.524  35.091  1.00  0.00           H  
ATOM   2977  CE2 TYR C 187      32.099  27.280  31.992  1.00  0.00           C  
ATOM   2978  HE2 TYR C 187      32.915  26.666  31.638  1.00  0.00           H  
ATOM   2979  CD2 TYR C 187      31.296  28.012  31.097  1.00  0.00           C  
ATOM   2980  HD2 TYR C 187      31.487  27.959  30.035  1.00  0.00           H  
ATOM   2981  C   TYR C 187      26.757  29.077  30.873  1.00  0.00           C  
ATOM   2982  O   TYR C 187      26.643  29.219  32.088  1.00  0.00           O  
ATOM   2983  N   LEU C 188      25.774  29.383  30.016  1.00  0.00           N  
ATOM   2984  H   LEU C 188      25.907  29.183  29.037  1.00  0.00           H  
ATOM   2985  CA  LEU C 188      24.501  29.982  30.412  1.00  0.00           C  
ATOM   2986  HA  LEU C 188      24.546  30.102  31.482  1.00  0.00           H  
ATOM   2987  CB  LEU C 188      24.331  31.378  29.765  1.00  0.00           C  
ATOM   2988  HB2 LEU C 188      24.170  31.230  28.696  1.00  0.00           H  
ATOM   2989  HB3 LEU C 188      23.427  31.835  30.171  1.00  0.00           H  
ATOM   2990  CG  LEU C 188      25.499  32.380  29.937  1.00  0.00           C  
ATOM   2991  HG  LEU C 188      26.391  31.969  29.481  1.00  0.00           H  
ATOM   2992  CD1 LEU C 188      25.163  33.682  29.210  1.00  0.00           C  
ATOM   2993 1HD1 LEU C 188      24.254  34.118  29.626  1.00  0.00           H  
ATOM   2994 2HD1 LEU C 188      25.983  34.388  29.338  1.00  0.00           H  
ATOM   2995 3HD1 LEU C 188      25.020  33.481  28.150  1.00  0.00           H  
ATOM   2996  CD2 LEU C 188      25.878  32.757  31.368  1.00  0.00           C  
ATOM   2997 1HD2 LEU C 188      26.096  31.858  31.942  1.00  0.00           H  
ATOM   2998 2HD2 LEU C 188      26.782  33.362  31.354  1.00  0.00           H  
ATOM   2999 3HD2 LEU C 188      25.076  33.331  31.833  1.00  0.00           H  
ATOM   3000  C   LEU C 188      23.302  29.048  30.177  1.00  0.00           C  
ATOM   3001  O   LEU C 188      23.413  28.046  29.472  1.00  0.00           O  
ATOM   3002  N   ALA C 189      22.158  29.348  30.799  1.00  0.00           N  
ATOM   3003  H   ALA C 189      22.131  30.176  31.375  1.00  0.00           H  
ATOM   3004  CA  ALA C 189      20.987  28.463  30.771  1.00  0.00           C  
ATOM   3005  HA  ALA C 189      21.322  27.508  31.168  1.00  0.00           H  
ATOM   3006  CB  ALA C 189      19.921  29.014  31.723  1.00  0.00           C  
ATOM   3007  HB1 ALA C 189      19.599  30.003  31.396  1.00  0.00           H  
ATOM   3008  HB2 ALA C 189      19.058  28.348  31.720  1.00  0.00           H  
ATOM   3009  HB3 ALA C 189      20.318  29.069  32.736  1.00  0.00           H  
ATOM   3010  C   ALA C 189      20.416  28.230  29.346  1.00  0.00           C  
ATOM   3011  O   ALA C 189      20.477  29.138  28.507  1.00  0.00           O  
ATOM   3012  N   PRO C 190      19.809  27.055  29.056  1.00  0.00           N  
ATOM   3013  CD  PRO C 190      19.681  25.895  29.931  1.00  0.00           C  
ATOM   3014  HD2 PRO C 190      18.780  25.994  30.538  1.00  0.00           H  
ATOM   3015  HD3 PRO C 190      20.550  25.751  30.567  1.00  0.00           H  
ATOM   3016  CG  PRO C 190      19.549  24.690  29.007  1.00  0.00           C  
ATOM   3017  HG2 PRO C 190      18.993  23.883  29.482  1.00  0.00           H  
ATOM   3018  HG3 PRO C 190      20.539  24.350  28.697  1.00  0.00           H  
ATOM   3019  CB  PRO C 190      18.805  25.276  27.812  1.00  0.00           C  
ATOM   3020  HB2 PRO C 190      17.736  25.298  28.028  1.00  0.00           H  
ATOM   3021  HB3 PRO C 190      19.000  24.716  26.899  1.00  0.00           H  
ATOM   3022  CA  PRO C 190      19.357  26.698  27.706  1.00  0.00           C  
ATOM   3023  HA  PRO C 190      20.229  26.683  27.054  1.00  0.00           H  
ATOM   3024  C   PRO C 190      18.316  27.639  27.083  1.00  0.00           C  
ATOM   3025  O   PRO C 190      18.220  27.705  25.859  1.00  0.00           O  
ATOM   3026  N   GLU C 191      17.583  28.416  27.887  1.00  0.00           N  
ATOM   3027  H   GLU C 191      17.622  28.238  28.885  1.00  0.00           H  
ATOM   3028  CA  GLU C 191      16.666  29.454  27.397  1.00  0.00           C  
ATOM   3029  HA  GLU C 191      15.835  28.971  26.881  1.00  0.00           H  
ATOM   3030  CB  GLU C 191      16.104  30.276  28.574  1.00  0.00           C  
ATOM   3031  HB2 GLU C 191      16.922  30.744  29.124  1.00  0.00           H  
ATOM   3032  HB3 GLU C 191      15.492  31.074  28.152  1.00  0.00           H  
ATOM   3033  CG  GLU C 191      15.214  29.485  29.547  1.00  0.00           C  
ATOM   3034  HG2 GLU C 191      14.480  30.176  29.969  1.00  0.00           H  
ATOM   3035  HG3 GLU C 191      14.658  28.722  28.999  1.00  0.00           H  
ATOM   3036  CD  GLU C 191      16.001  28.850  30.701  1.00  0.00           C  
ATOM   3037  OE1 GLU C 191      16.573  27.747  30.526  1.00  0.00           O  
ATOM   3038  OE2 GLU C 191      16.034  29.432  31.807  1.00  0.00           O  
ATOM   3039  C   GLU C 191      17.325  30.411  26.383  1.00  0.00           C  
ATOM   3040  O   GLU C 191      16.686  30.803  25.404  1.00  0.00           O  
ATOM   3041  N   LEU C 192      18.615  30.738  26.556  1.00  0.00           N  
ATOM   3042  H   LEU C 192      19.117  30.334  27.339  1.00  0.00           H  
ATOM   3043  CA  LEU C 192      19.331  31.648  25.656  1.00  0.00           C  
ATOM   3044  HA  LEU C 192      18.690  32.508  25.456  1.00  0.00           H  
ATOM   3045  CB  LEU C 192      20.623  32.165  26.322  1.00  0.00           C  
ATOM   3046  HB2 LEU C 192      21.233  31.325  26.654  1.00  0.00           H  
ATOM   3047  HB3 LEU C 192      21.180  32.690  25.544  1.00  0.00           H  
ATOM   3048  CG  LEU C 192      20.419  33.157  27.489  1.00  0.00           C  
ATOM   3049  HG  LEU C 192      19.653  33.879  27.215  1.00  0.00           H  
ATOM   3050  CD1 LEU C 192      20.025  32.499  28.814  1.00  0.00           C  
ATOM   3051 1HD1 LEU C 192      20.741  31.722  29.077  1.00  0.00           H  
ATOM   3052 2HD1 LEU C 192      20.001  33.251  29.602  1.00  0.00           H  
ATOM   3053 3HD1 LEU C 192      19.028  32.070  28.740  1.00  0.00           H  
ATOM   3054  CD2 LEU C 192      21.722  33.919  27.737  1.00  0.00           C  
ATOM   3055 1HD2 LEU C 192      22.015  34.457  26.835  1.00  0.00           H  
ATOM   3056 2HD2 LEU C 192      21.578  34.645  28.538  1.00  0.00           H  
ATOM   3057 3HD2 LEU C 192      22.509  33.219  28.013  1.00  0.00           H  
ATOM   3058  C   LEU C 192      19.623  31.003  24.286  1.00  0.00           C  
ATOM   3059  O   LEU C 192      19.582  31.698  23.274  1.00  0.00           O  
ATOM   3060  N   PHE C 193      19.833  29.682  24.218  1.00  0.00           N  
ATOM   3061  H   PHE C 193      19.756  29.145  25.072  1.00  0.00           H  
ATOM   3062  CA  PHE C 193      19.953  28.950  22.945  1.00  0.00           C  
ATOM   3063  HA  PHE C 193      20.702  29.439  22.320  1.00  0.00           H  
ATOM   3064  CB  PHE C 193      20.390  27.497  23.208  1.00  0.00           C  
ATOM   3065  HB2 PHE C 193      19.965  27.142  24.145  1.00  0.00           H  
ATOM   3066  HB3 PHE C 193      19.969  26.867  22.425  1.00  0.00           H  
ATOM   3067  CG  PHE C 193      21.885  27.248  23.204  1.00  0.00           C  
ATOM   3068  CD1 PHE C 193      22.585  27.277  21.985  1.00  0.00           C  
ATOM   3069  HD1 PHE C 193      22.066  27.537  21.072  1.00  0.00           H  
ATOM   3070  CE1 PHE C 193      23.947  26.937  21.942  1.00  0.00           C  
ATOM   3071  HE1 PHE C 193      24.468  26.946  20.998  1.00  0.00           H  
ATOM   3072  CZ  PHE C 193      24.615  26.553  23.118  1.00  0.00           C  
ATOM   3073  HZ  PHE C 193      25.652  26.255  23.085  1.00  0.00           H  
ATOM   3074  CE2 PHE C 193      23.920  26.531  24.340  1.00  0.00           C  
ATOM   3075  HE2 PHE C 193      24.419  26.209  25.243  1.00  0.00           H  
ATOM   3076  CD2 PHE C 193      22.560  26.887  24.387  1.00  0.00           C  
ATOM   3077  HD2 PHE C 193      22.030  26.848  25.328  1.00  0.00           H  
ATOM   3078  C   PHE C 193      18.638  28.954  22.146  1.00  0.00           C  
ATOM   3079  O   PHE C 193      18.651  29.007  20.913  1.00  0.00           O  
ATOM   3080  N   GLU C 194      17.499  28.943  22.840  1.00  0.00           N  
ATOM   3081  H   GLU C 194      17.562  28.868  23.849  1.00  0.00           H  
ATOM   3082  CA  GLU C 194      16.157  29.024  22.243  1.00  0.00           C  
ATOM   3083  HA  GLU C 194      16.159  28.497  21.288  1.00  0.00           H  
ATOM   3084  CB  GLU C 194      15.151  28.317  23.170  1.00  0.00           C  
ATOM   3085  HB2 GLU C 194      15.195  28.780  24.157  1.00  0.00           H  
ATOM   3086  HB3 GLU C 194      14.141  28.461  22.784  1.00  0.00           H  
ATOM   3087  CG  GLU C 194      15.409  26.807  23.325  1.00  0.00           C  
ATOM   3088  HG2 GLU C 194      16.432  26.642  23.673  1.00  0.00           H  
ATOM   3089  HG3 GLU C 194      14.741  26.424  24.100  1.00  0.00           H  
ATOM   3090  CD  GLU C 194      15.160  26.021  22.030  1.00  0.00           C  
ATOM   3091  OE1 GLU C 194      16.076  25.308  21.558  1.00  0.00           O  
ATOM   3092  OE2 GLU C 194      14.025  26.077  21.499  1.00  0.00           O  
ATOM   3093  C   GLU C 194      15.726  30.474  21.940  1.00  0.00           C  
ATOM   3094  O   GLU C 194      14.710  30.684  21.277  1.00  0.00           O  
ATOM   3095  N   ASN C 195      16.514  31.476  22.361  1.00  0.00           N  
ATOM   3096  H   ASN C 195      17.361  31.220  22.855  1.00  0.00           H  
ATOM   3097  CA  ASN C 195      16.183  32.911  22.337  1.00  0.00           C  
ATOM   3098  HA  ASN C 195      16.972  33.418  22.897  1.00  0.00           H  
ATOM   3099  CB  ASN C 195      16.233  33.498  20.902  1.00  0.00           C  
ATOM   3100  HB2 ASN C 195      15.435  33.057  20.309  1.00  0.00           H  
ATOM   3101  HB3 ASN C 195      16.039  34.568  20.959  1.00  0.00           H  
ATOM   3102  CG  ASN C 195      17.546  33.312  20.148  1.00  0.00           C  
ATOM   3103  OD1 ASN C 195      18.219  34.259  19.770  1.00  0.00           O  
ATOM   3104  ND2 ASN C 195      17.963  32.099  19.871  1.00  0.00           N  
ATOM   3105 1HD2 ASN C 195      18.867  32.011  19.447  1.00  0.00           H  
ATOM   3106 2HD2 ASN C 195      17.465  31.312  20.246  1.00  0.00           H  
ATOM   3107  C   ASN C 195      14.881  33.220  23.121  1.00  0.00           C  
ATOM   3108  O   ASN C 195      14.087  34.083  22.737  1.00  0.00           O  
ATOM   3109  N   LYS C 196      14.653  32.499  24.230  1.00  0.00           N  
ATOM   3110  H   LYS C 196      15.383  31.851  24.513  1.00  0.00           H  
ATOM   3111  CA  LYS C 196      13.553  32.720  25.185  1.00  0.00           C  
ATOM   3112  HA  LYS C 196      12.679  33.059  24.632  1.00  0.00           H  
ATOM   3113  CB  LYS C 196      13.206  31.403  25.910  1.00  0.00           C  
ATOM   3114  HB2 LYS C 196      14.090  30.767  25.966  1.00  0.00           H  
ATOM   3115  HB3 LYS C 196      12.904  31.636  26.933  1.00  0.00           H  
ATOM   3116  CG  LYS C 196      12.058  30.624  25.251  1.00  0.00           C  
ATOM   3117  HG2 LYS C 196      11.169  31.257  25.234  1.00  0.00           H  
ATOM   3118  HG3 LYS C 196      12.326  30.358  24.228  1.00  0.00           H  
ATOM   3119  CD  LYS C 196      11.757  29.350  26.059  1.00  0.00           C  
ATOM   3120  HD2 LYS C 196      12.601  28.665  25.972  1.00  0.00           H  
ATOM   3121  HD3 LYS C 196      11.623  29.617  27.110  1.00  0.00           H  
ATOM   3122  CE  LYS C 196      10.480  28.669  25.553  1.00  0.00           C  
ATOM   3123  HE2 LYS C 196       9.661  29.393  25.596  1.00  0.00           H  
ATOM   3124  HE3 LYS C 196      10.617  28.394  24.502  1.00  0.00           H  
ATOM   3125  NZ  LYS C 196      10.129  27.470  26.355  1.00  0.00           N  
ATOM   3126  HZ1 LYS C 196       9.950  27.707  27.320  1.00  0.00           H  
ATOM   3127  HZ2 LYS C 196       9.273  27.039  25.997  1.00  0.00           H  
ATOM   3128  HZ3 LYS C 196      10.851  26.764  26.312  1.00  0.00           H  
ATOM   3129  C   LYS C 196      13.941  33.789  26.221  1.00  0.00           C  
ATOM   3130  O   LYS C 196      15.031  33.685  26.786  1.00  0.00           O  
ATOM   3131  N   PRO C 197      13.063  34.761  26.548  1.00  0.00           N  
ATOM   3132  CD  PRO C 197      11.811  35.086  25.882  1.00  0.00           C  
ATOM   3133  HD2 PRO C 197      11.027  34.410  26.230  1.00  0.00           H  
ATOM   3134  HD3 PRO C 197      11.905  35.038  24.796  1.00  0.00           H  
ATOM   3135  CG  PRO C 197      11.490  36.518  26.306  1.00  0.00           C  
ATOM   3136  HG2 PRO C 197      10.417  36.717  26.285  1.00  0.00           H  
ATOM   3137  HG3 PRO C 197      12.024  37.217  25.663  1.00  0.00           H  
ATOM   3138  CB  PRO C 197      12.050  36.587  27.726  1.00  0.00           C  
ATOM   3139  HB2 PRO C 197      11.314  36.176  28.418  1.00  0.00           H  
ATOM   3140  HB3 PRO C 197      12.314  37.605  28.011  1.00  0.00           H  
ATOM   3141  CA  PRO C 197      13.285  35.680  27.666  1.00  0.00           C  
ATOM   3142  HA  PRO C 197      14.165  36.280  27.441  1.00  0.00           H  
ATOM   3143  C   PRO C 197      13.493  34.917  28.980  1.00  0.00           C  
ATOM   3144  O   PRO C 197      12.750  33.978  29.272  1.00  0.00           O  
ATOM   3145  N   TYR C 198      14.503  35.300  29.763  1.00  0.00           N  
ATOM   3146  H   TYR C 198      15.046  36.111  29.481  1.00  0.00           H  
ATOM   3147  CA  TYR C 198      15.026  34.467  30.850  1.00  0.00           C  
ATOM   3148  HA  TYR C 198      14.406  33.573  30.921  1.00  0.00           H  
ATOM   3149  CB  TYR C 198      16.425  33.965  30.466  1.00  0.00           C  
ATOM   3150  HB2 TYR C 198      16.769  33.263  31.227  1.00  0.00           H  
ATOM   3151  HB3 TYR C 198      16.345  33.404  29.533  1.00  0.00           H  
ATOM   3152  CG  TYR C 198      17.477  35.043  30.301  1.00  0.00           C  
ATOM   3153  CD1 TYR C 198      18.044  35.633  31.442  1.00  0.00           C  
ATOM   3154  HD1 TYR C 198      17.696  35.352  32.425  1.00  0.00           H  
ATOM   3155  CE1 TYR C 198      19.080  36.569  31.317  1.00  0.00           C  
ATOM   3156  HE1 TYR C 198      19.518  37.001  32.202  1.00  0.00           H  
ATOM   3157  CZ  TYR C 198      19.510  36.959  30.035  1.00  0.00           C  
ATOM   3158  OH  TYR C 198      20.458  37.918  29.951  1.00  0.00           O  
ATOM   3159  HH  TYR C 198      20.664  38.219  30.836  1.00  0.00           H  
ATOM   3160  CE2 TYR C 198      18.924  36.402  28.880  1.00  0.00           C  
ATOM   3161  HE2 TYR C 198      19.254  36.727  27.904  1.00  0.00           H  
ATOM   3162  CD2 TYR C 198      17.911  35.432  29.017  1.00  0.00           C  
ATOM   3163  HD2 TYR C 198      17.459  34.990  28.140  1.00  0.00           H  
ATOM   3164  C   TYR C 198      14.965  35.121  32.243  1.00  0.00           C  
ATOM   3165  O   TYR C 198      14.904  36.341  32.397  1.00  0.00           O  
ATOM   3166  N   THR C 199      14.982  34.262  33.266  1.00  0.00           N  
ATOM   3167  H   THR C 199      15.149  33.295  33.040  1.00  0.00           H  
ATOM   3168  CA  THR C 199      14.861  34.596  34.702  1.00  0.00           C  
ATOM   3169  HA  THR C 199      14.275  35.510  34.818  1.00  0.00           H  
ATOM   3170  CB  THR C 199      14.155  33.460  35.465  1.00  0.00           C  
ATOM   3171  HB  THR C 199      14.125  33.706  36.526  1.00  0.00           H  
ATOM   3172  CG2 THR C 199      12.723  33.224  34.996  1.00  0.00           C  
ATOM   3173 1HG2 THR C 199      12.696  32.972  33.935  1.00  0.00           H  
ATOM   3174 2HG2 THR C 199      12.279  32.414  35.575  1.00  0.00           H  
ATOM   3175 3HG2 THR C 199      12.142  34.129  35.165  1.00  0.00           H  
ATOM   3176  OG1 THR C 199      14.856  32.239  35.315  1.00  0.00           O  
ATOM   3177  HG1 THR C 199      14.483  31.801  34.541  1.00  0.00           H  
ATOM   3178  C   THR C 199      16.221  34.831  35.361  1.00  0.00           C  
ATOM   3179  O   THR C 199      17.257  34.523  34.782  1.00  0.00           O  
ATOM   3180  N   ALA C 200      16.254  35.266  36.622  1.00  0.00           N  
ATOM   3181  H   ALA C 200      15.383  35.539  37.071  1.00  0.00           H  
ATOM   3182  CA  ALA C 200      17.496  35.384  37.392  1.00  0.00           C  
ATOM   3183  HA  ALA C 200      18.156  36.032  36.821  1.00  0.00           H  
ATOM   3184  CB  ALA C 200      17.177  36.056  38.731  1.00  0.00           C  
ATOM   3185  HB1 ALA C 200      16.531  35.411  39.329  1.00  0.00           H  
ATOM   3186  HB2 ALA C 200      18.101  36.237  39.282  1.00  0.00           H  
ATOM   3187  HB3 ALA C 200      16.674  37.007  38.558  1.00  0.00           H  
ATOM   3188  C   ALA C 200      18.246  34.049  37.606  1.00  0.00           C  
ATOM   3189  O   ALA C 200      19.418  34.050  37.982  1.00  0.00           O  
ATOM   3190  N   THR C 201      17.608  32.904  37.332  1.00  0.00           N  
ATOM   3191  H   THR C 201      16.672  32.965  36.963  1.00  0.00           H  
ATOM   3192  CA  THR C 201      18.189  31.565  37.536  1.00  0.00           C  
ATOM   3193  HA  THR C 201      18.605  31.539  38.544  1.00  0.00           H  
ATOM   3194  CB  THR C 201      17.135  30.449  37.449  1.00  0.00           C  
ATOM   3195  HB  THR C 201      17.598  29.521  37.784  1.00  0.00           H  
ATOM   3196  CG2 THR C 201      15.904  30.690  38.321  1.00  0.00           C  
ATOM   3197 1HG2 THR C 201      15.365  31.580  37.999  1.00  0.00           H  
ATOM   3198 2HG2 THR C 201      15.239  29.829  38.247  1.00  0.00           H  
ATOM   3199 3HG2 THR C 201      16.213  30.812  39.358  1.00  0.00           H  
ATOM   3200  OG1 THR C 201      16.687  30.268  36.123  1.00  0.00           O  
ATOM   3201  HG1 THR C 201      16.058  30.983  35.925  1.00  0.00           H  
ATOM   3202  C   THR C 201      19.351  31.229  36.595  1.00  0.00           C  
ATOM   3203  O   THR C 201      19.955  30.168  36.752  1.00  0.00           O  
ATOM   3204  N   VAL C 202      19.703  32.102  35.637  1.00  0.00           N  
ATOM   3205  H   VAL C 202      19.164  32.951  35.524  1.00  0.00           H  
ATOM   3206  CA  VAL C 202      20.812  31.832  34.707  1.00  0.00           C  
ATOM   3207  HA  VAL C 202      20.587  30.881  34.227  1.00  0.00           H  
ATOM   3208  CB  VAL C 202      20.934  32.863  33.554  1.00  0.00           C  
ATOM   3209  HB  VAL C 202      21.409  32.362  32.717  1.00  0.00           H  
ATOM   3210  CG1 VAL C 202      19.584  33.300  33.003  1.00  0.00           C  
ATOM   3211 1HG1 VAL C 202      19.238  34.156  33.571  1.00  0.00           H  
ATOM   3212 2HG1 VAL C 202      19.708  33.601  31.965  1.00  0.00           H  
ATOM   3213 3HG1 VAL C 202      18.854  32.491  33.047  1.00  0.00           H  
ATOM   3214  CG2 VAL C 202      21.736  34.137  33.870  1.00  0.00           C  
ATOM   3215 1HG2 VAL C 202      22.778  33.888  34.067  1.00  0.00           H  
ATOM   3216 2HG2 VAL C 202      21.713  34.805  33.008  1.00  0.00           H  
ATOM   3217 3HG2 VAL C 202      21.317  34.649  34.736  1.00  0.00           H  
ATOM   3218  C   VAL C 202      22.126  31.618  35.469  1.00  0.00           C  
ATOM   3219  O   VAL C 202      22.812  30.627  35.221  1.00  0.00           O  
ATOM   3220  N   ASP C 203      22.447  32.450  36.467  1.00  0.00           N  
ATOM   3221  H   ASP C 203      21.836  33.230  36.665  1.00  0.00           H  
ATOM   3222  CA  ASP C 203      23.678  32.285  37.258  1.00  0.00           C  
ATOM   3223  HA  ASP C 203      24.518  32.288  36.564  1.00  0.00           H  
ATOM   3224  CB  ASP C 203      23.882  33.454  38.234  1.00  0.00           C  
ATOM   3225  HB2 ASP C 203      23.060  33.444  38.953  1.00  0.00           H  
ATOM   3226  HB3 ASP C 203      24.809  33.279  38.783  1.00  0.00           H  
ATOM   3227  CG  ASP C 203      23.979  34.850  37.617  1.00  0.00           C  
ATOM   3228  OD1 ASP C 203      24.402  34.991  36.444  1.00  0.00           O  
ATOM   3229  OD2 ASP C 203      23.730  35.816  38.366  1.00  0.00           O  
ATOM   3230  C   ASP C 203      23.752  30.951  38.023  1.00  0.00           C  
ATOM   3231  O   ASP C 203      24.848  30.502  38.358  1.00  0.00           O  
ATOM   3232  N   TYR C 204      22.616  30.287  38.267  1.00  0.00           N  
ATOM   3233  H   TYR C 204      21.745  30.668  37.921  1.00  0.00           H  
ATOM   3234  CA  TYR C 204      22.581  28.972  38.918  1.00  0.00           C  
ATOM   3235  HA  TYR C 204      23.261  28.991  39.768  1.00  0.00           H  
ATOM   3236  CB  TYR C 204      21.167  28.659  39.449  1.00  0.00           C  
ATOM   3237  HB2 TYR C 204      20.513  28.481  38.596  1.00  0.00           H  
ATOM   3238  HB3 TYR C 204      21.211  27.724  40.004  1.00  0.00           H  
ATOM   3239  CG  TYR C 204      20.501  29.704  40.343  1.00  0.00           C  
ATOM   3240  CD1 TYR C 204      21.238  30.752  40.935  1.00  0.00           C  
ATOM   3241  HD1 TYR C 204      22.309  30.813  40.819  1.00  0.00           H  
ATOM   3242  CE1 TYR C 204      20.582  31.762  41.660  1.00  0.00           C  
ATOM   3243  HE1 TYR C 204      21.150  32.575  42.081  1.00  0.00           H  
ATOM   3244  CZ  TYR C 204      19.187  31.718  41.836  1.00  0.00           C  
ATOM   3245  OH  TYR C 204      18.554  32.738  42.472  1.00  0.00           O  
ATOM   3246  HH  TYR C 204      19.146  33.496  42.584  1.00  0.00           H  
ATOM   3247  CE2 TYR C 204      18.455  30.627  41.323  1.00  0.00           C  
ATOM   3248  HE2 TYR C 204      17.390  30.581  41.490  1.00  0.00           H  
ATOM   3249  CD2 TYR C 204      19.110  29.627  40.573  1.00  0.00           C  
ATOM   3250  HD2 TYR C 204      18.543  28.802  40.162  1.00  0.00           H  
ATOM   3251  C   TYR C 204      23.091  27.884  37.963  1.00  0.00           C  
ATOM   3252  O   TYR C 204      23.884  27.035  38.368  1.00  0.00           O  
ATOM   3253  N   TRP C 205      22.749  27.974  36.672  1.00  0.00           N  
ATOM   3254  H   TRP C 205      22.149  28.737  36.386  1.00  0.00           H  
ATOM   3255  CA  TRP C 205      23.331  27.116  35.635  1.00  0.00           C  
ATOM   3256  HA  TRP C 205      23.198  26.073  35.927  1.00  0.00           H  
ATOM   3257  CB  TRP C 205      22.594  27.338  34.309  1.00  0.00           C  
ATOM   3258  HB2 TRP C 205      21.523  27.228  34.485  1.00  0.00           H  
ATOM   3259  HB3 TRP C 205      22.768  28.356  33.959  1.00  0.00           H  
ATOM   3260  CG  TRP C 205      22.983  26.392  33.214  1.00  0.00           C  
ATOM   3261  CD1 TRP C 205      24.105  26.471  32.460  1.00  0.00           C  
ATOM   3262  HD1 TRP C 205      24.872  27.232  32.557  1.00  0.00           H  
ATOM   3263  NE1 TRP C 205      24.141  25.413  31.571  1.00  0.00           N  
ATOM   3264  HE1 TRP C 205      24.923  25.222  30.951  1.00  0.00           H  
ATOM   3265  CE2 TRP C 205      23.019  24.623  31.680  1.00  0.00           C  
ATOM   3266  CZ2 TRP C 205      22.588  23.480  30.995  1.00  0.00           C  
ATOM   3267  HZ2 TRP C 205      23.183  23.072  30.192  1.00  0.00           H  
ATOM   3268  CH2 TRP C 205      21.381  22.869  31.377  1.00  0.00           C  
ATOM   3269  HH2 TRP C 205      21.043  21.974  30.874  1.00  0.00           H  
ATOM   3270  CZ3 TRP C 205      20.625  23.412  32.431  1.00  0.00           C  
ATOM   3271  HZ3 TRP C 205      19.710  22.923  32.731  1.00  0.00           H  
ATOM   3272  CE3 TRP C 205      21.065  24.565  33.111  1.00  0.00           C  
ATOM   3273  HE3 TRP C 205      20.485  24.959  33.932  1.00  0.00           H  
ATOM   3274  CD2 TRP C 205      22.271  25.206  32.746  1.00  0.00           C  
ATOM   3275  C   TRP C 205      24.838  27.367  35.478  1.00  0.00           C  
ATOM   3276  O   TRP C 205      25.619  26.415  35.405  1.00  0.00           O  
ATOM   3277  N   SER C 206      25.271  28.635  35.496  1.00  0.00           N  
ATOM   3278  H   SER C 206      24.588  29.384  35.501  1.00  0.00           H  
ATOM   3279  CA  SER C 206      26.693  29.001  35.409  1.00  0.00           C  
ATOM   3280  HA  SER C 206      27.104  28.582  34.492  1.00  0.00           H  
ATOM   3281  CB  SER C 206      26.888  30.526  35.375  1.00  0.00           C  
ATOM   3282  HB2 SER C 206      26.842  30.912  36.394  1.00  0.00           H  
ATOM   3283  HB3 SER C 206      27.875  30.741  34.968  1.00  0.00           H  
ATOM   3284  OG  SER C 206      25.923  31.220  34.610  1.00  0.00           O  
ATOM   3285  HG  SER C 206      26.098  32.175  34.747  1.00  0.00           H  
ATOM   3286  C   SER C 206      27.493  28.438  36.589  1.00  0.00           C  
ATOM   3287  O   SER C 206      28.524  27.791  36.403  1.00  0.00           O  
ATOM   3288  N   PHE C 207      26.996  28.619  37.818  1.00  0.00           N  
ATOM   3289  H   PHE C 207      26.142  29.160  37.926  1.00  0.00           H  
ATOM   3290  CA  PHE C 207      27.670  28.136  39.024  1.00  0.00           C  
ATOM   3291  HA  PHE C 207      28.712  28.441  38.949  1.00  0.00           H  
ATOM   3292  CB  PHE C 207      27.053  28.822  40.255  1.00  0.00           C  
ATOM   3293  HB2 PHE C 207      27.041  29.897  40.076  1.00  0.00           H  
ATOM   3294  HB3 PHE C 207      26.015  28.498  40.339  1.00  0.00           H  
ATOM   3295  CG  PHE C 207      27.747  28.603  41.594  1.00  0.00           C  
ATOM   3296  CD1 PHE C 207      29.146  28.430  41.688  1.00  0.00           C  
ATOM   3297  HD1 PHE C 207      29.760  28.409  40.803  1.00  0.00           H  
ATOM   3298  CE1 PHE C 207      29.763  28.280  42.943  1.00  0.00           C  
ATOM   3299  HE1 PHE C 207      30.833  28.143  43.010  1.00  0.00           H  
ATOM   3300  CZ  PHE C 207      28.990  28.308  44.115  1.00  0.00           C  
ATOM   3301  HZ  PHE C 207      29.466  28.197  45.079  1.00  0.00           H  
ATOM   3302  CE2 PHE C 207      27.599  28.487  44.029  1.00  0.00           C  
ATOM   3303  HE2 PHE C 207      27.004  28.512  44.930  1.00  0.00           H  
ATOM   3304  CD2 PHE C 207      26.982  28.637  42.776  1.00  0.00           C  
ATOM   3305  HD2 PHE C 207      25.914  28.791  42.724  1.00  0.00           H  
ATOM   3306  C   PHE C 207      27.653  26.600  39.118  1.00  0.00           C  
ATOM   3307  O   PHE C 207      28.679  26.008  39.448  1.00  0.00           O  
ATOM   3308  N   GLY C 208      26.553  25.946  38.724  1.00  0.00           N  
ATOM   3309  H   GLY C 208      25.728  26.483  38.470  1.00  0.00           H  
ATOM   3310  CA  GLY C 208      26.488  24.487  38.576  1.00  0.00           C  
ATOM   3311  HA2 GLY C 208      26.674  24.012  39.540  1.00  0.00           H  
ATOM   3312  HA3 GLY C 208      25.491  24.213  38.235  1.00  0.00           H  
ATOM   3313  C   GLY C 208      27.502  23.953  37.557  1.00  0.00           C  
ATOM   3314  O   GLY C 208      28.204  22.983  37.835  1.00  0.00           O  
ATOM   3315  N   THR C 209      27.658  24.636  36.418  1.00  0.00           N  
ATOM   3316  H   THR C 209      27.032  25.417  36.245  1.00  0.00           H  
ATOM   3317  CA  THR C 209      28.654  24.305  35.381  1.00  0.00           C  
ATOM   3318  HA  THR C 209      28.527  23.261  35.096  1.00  0.00           H  
ATOM   3319  CB  THR C 209      28.435  25.169  34.124  1.00  0.00           C  
ATOM   3320  HB  THR C 209      28.548  26.223  34.377  1.00  0.00           H  
ATOM   3321  CG2 THR C 209      29.380  24.836  32.969  1.00  0.00           C  
ATOM   3322 1HG2 THR C 209      29.175  23.836  32.603  1.00  0.00           H  
ATOM   3323 2HG2 THR C 209      29.222  25.550  32.160  1.00  0.00           H  
ATOM   3324 3HG2 THR C 209      30.419  24.894  33.286  1.00  0.00           H  
ATOM   3325  OG1 THR C 209      27.139  24.949  33.620  1.00  0.00           O  
ATOM   3326  HG1 THR C 209      26.509  25.421  34.192  1.00  0.00           H  
ATOM   3327  C   THR C 209      30.083  24.466  35.909  1.00  0.00           C  
ATOM   3328  O   THR C 209      30.917  23.587  35.701  1.00  0.00           O  
ATOM   3329  N   MET C 210      30.370  25.545  36.650  1.00  0.00           N  
ATOM   3330  H   MET C 210      29.636  26.236  36.783  1.00  0.00           H  
ATOM   3331  CA  MET C 210      31.671  25.772  37.294  1.00  0.00           C  
ATOM   3332  HA  MET C 210      32.457  25.673  36.547  1.00  0.00           H  
ATOM   3333  CB  MET C 210      31.713  27.206  37.848  1.00  0.00           C  
ATOM   3334  HB2 MET C 210      31.587  27.901  37.018  1.00  0.00           H  
ATOM   3335  HB3 MET C 210      30.894  27.356  38.550  1.00  0.00           H  
ATOM   3336  CG  MET C 210      33.038  27.525  38.552  1.00  0.00           C  
ATOM   3337  HG2 MET C 210      33.003  27.131  39.569  1.00  0.00           H  
ATOM   3338  HG3 MET C 210      33.842  27.008  38.030  1.00  0.00           H  
ATOM   3339  SD  MET C 210      33.465  29.288  38.614  1.00  0.00           S  
ATOM   3340  CE  MET C 210      32.081  29.947  39.575  1.00  0.00           C  
ATOM   3341  HE1 MET C 210      32.050  29.465  40.552  1.00  0.00           H  
ATOM   3342  HE2 MET C 210      32.215  31.021  39.706  1.00  0.00           H  
ATOM   3343  HE3 MET C 210      31.145  29.768  39.046  1.00  0.00           H  
ATOM   3344  C   MET C 210      32.006  24.725  38.361  1.00  0.00           C  
ATOM   3345  O   MET C 210      33.132  24.235  38.386  1.00  0.00           O  
ATOM   3346  N   VAL C 211      31.050  24.332  39.206  1.00  0.00           N  
ATOM   3347  H   VAL C 211      30.138  24.778  39.166  1.00  0.00           H  
ATOM   3348  CA  VAL C 211      31.279  23.264  40.193  1.00  0.00           C  
ATOM   3349  HA  VAL C 211      32.224  23.467  40.697  1.00  0.00           H  
ATOM   3350  CB  VAL C 211      30.180  23.261  41.274  1.00  0.00           C  
ATOM   3351  HB  VAL C 211      29.201  23.237  40.793  1.00  0.00           H  
ATOM   3352  CG1 VAL C 211      30.291  22.064  42.227  1.00  0.00           C  
ATOM   3353 1HG1 VAL C 211      31.301  21.998  42.633  1.00  0.00           H  
ATOM   3354 2HG1 VAL C 211      29.581  22.165  43.048  1.00  0.00           H  
ATOM   3355 3HG1 VAL C 211      30.059  21.143  41.692  1.00  0.00           H  
ATOM   3356  CG2 VAL C 211      30.291  24.532  42.131  1.00  0.00           C  
ATOM   3357 1HG2 VAL C 211      30.168  25.420  41.512  1.00  0.00           H  
ATOM   3358 2HG2 VAL C 211      29.512  24.536  42.892  1.00  0.00           H  
ATOM   3359 3HG2 VAL C 211      31.264  24.571  42.621  1.00  0.00           H  
ATOM   3360  C   VAL C 211      31.459  21.904  39.508  1.00  0.00           C  
ATOM   3361  O   VAL C 211      32.313  21.134  39.936  1.00  0.00           O  
ATOM   3362  N   PHE C 212      30.754  21.625  38.406  1.00  0.00           N  
ATOM   3363  H   PHE C 212      30.036  22.272  38.100  1.00  0.00           H  
ATOM   3364  CA  PHE C 212      30.960  20.395  37.629  1.00  0.00           C  
ATOM   3365  HA  PHE C 212      30.906  19.553  38.320  1.00  0.00           H  
ATOM   3366  CB  PHE C 212      29.818  20.229  36.614  1.00  0.00           C  
ATOM   3367  HB2 PHE C 212      28.884  20.531  37.090  1.00  0.00           H  
ATOM   3368  HB3 PHE C 212      29.988  20.905  35.778  1.00  0.00           H  
ATOM   3369  CG  PHE C 212      29.638  18.810  36.096  1.00  0.00           C  
ATOM   3370  CD1 PHE C 212      28.516  18.051  36.487  1.00  0.00           C  
ATOM   3371  HD1 PHE C 212      27.772  18.482  37.140  1.00  0.00           H  
ATOM   3372  CE1 PHE C 212      28.344  16.739  36.008  1.00  0.00           C  
ATOM   3373  HE1 PHE C 212      27.468  16.172  36.291  1.00  0.00           H  
ATOM   3374  CZ  PHE C 212      29.300  16.175  35.146  1.00  0.00           C  
ATOM   3375  HZ  PHE C 212      29.172  15.167  34.780  1.00  0.00           H  
ATOM   3376  CE2 PHE C 212      30.420  16.926  34.752  1.00  0.00           C  
ATOM   3377  HE2 PHE C 212      31.159  16.501  34.088  1.00  0.00           H  
ATOM   3378  CD2 PHE C 212      30.582  18.242  35.222  1.00  0.00           C  
ATOM   3379  HD2 PHE C 212      31.445  18.810  34.916  1.00  0.00           H  
ATOM   3380  C   PHE C 212      32.355  20.347  36.974  1.00  0.00           C  
ATOM   3381  O   PHE C 212      33.036  19.327  37.092  1.00  0.00           O  
ATOM   3382  N   GLU C 213      32.845  21.447  36.378  1.00  0.00           N  
ATOM   3383  H   GLU C 213      32.248  22.262  36.276  1.00  0.00           H  
ATOM   3384  CA  GLU C 213      34.240  21.519  35.897  1.00  0.00           C  
ATOM   3385  HA  GLU C 213      34.404  20.699  35.197  1.00  0.00           H  
ATOM   3386  CB  GLU C 213      34.547  22.842  35.159  1.00  0.00           C  
ATOM   3387  HB2 GLU C 213      34.200  23.691  35.748  1.00  0.00           H  
ATOM   3388  HB3 GLU C 213      35.633  22.922  35.077  1.00  0.00           H  
ATOM   3389  CG  GLU C 213      33.958  22.922  33.736  1.00  0.00           C  
ATOM   3390  HG2 GLU C 213      33.831  21.913  33.350  1.00  0.00           H  
ATOM   3391  HG3 GLU C 213      32.969  23.382  33.779  1.00  0.00           H  
ATOM   3392  CD  GLU C 213      34.869  23.688  32.759  1.00  0.00           C  
ATOM   3393  OE1 GLU C 213      34.561  24.831  32.352  1.00  0.00           O  
ATOM   3394  OE2 GLU C 213      35.932  23.154  32.366  1.00  0.00           O  
ATOM   3395  C   GLU C 213      35.252  21.305  37.041  1.00  0.00           C  
ATOM   3396  O   GLU C 213      36.263  20.636  36.839  1.00  0.00           O  
ATOM   3397  N   CYS C 214      34.966  21.775  38.260  1.00  0.00           N  
ATOM   3398  H   CYS C 214      34.156  22.372  38.373  1.00  0.00           H  
ATOM   3399  CA  CYS C 214      35.809  21.506  39.431  1.00  0.00           C  
ATOM   3400  HA  CYS C 214      36.851  21.638  39.139  1.00  0.00           H  
ATOM   3401  CB  CYS C 214      35.497  22.525  40.531  1.00  0.00           C  
ATOM   3402  HB2 CYS C 214      34.424  22.534  40.730  1.00  0.00           H  
ATOM   3403  HB3 CYS C 214      36.026  22.237  41.441  1.00  0.00           H  
ATOM   3404  SG  CYS C 214      36.062  24.170  40.014  1.00  0.00           S  
ATOM   3405  HG  CYS C 214      35.668  24.824  41.112  1.00  0.00           H  
ATOM   3406  C   CYS C 214      35.706  20.069  39.980  1.00  0.00           C  
ATOM   3407  O   CYS C 214      36.615  19.655  40.692  1.00  0.00           O  
ATOM   3408  N   ILE C 215      34.649  19.307  39.674  1.00  0.00           N  
ATOM   3409  H   ILE C 215      33.903  19.733  39.137  1.00  0.00           H  
ATOM   3410  CA  ILE C 215      34.494  17.896  40.087  1.00  0.00           C  
ATOM   3411  HA  ILE C 215      35.046  17.734  41.015  1.00  0.00           H  
ATOM   3412  CB  ILE C 215      33.000  17.582  40.371  1.00  0.00           C  
ATOM   3413  HB  ILE C 215      32.407  17.945  39.530  1.00  0.00           H  
ATOM   3414  CG2 ILE C 215      32.737  16.069  40.527  1.00  0.00           C  
ATOM   3415 1HG2 ILE C 215      33.369  15.660  41.316  1.00  0.00           H  
ATOM   3416 2HG2 ILE C 215      31.694  15.879  40.771  1.00  0.00           H  
ATOM   3417 3HG2 ILE C 215      32.947  15.546  39.594  1.00  0.00           H  
ATOM   3418  CG1 ILE C 215      32.544  18.302  41.660  1.00  0.00           C  
ATOM   3419 2HG1 ILE C 215      32.990  17.806  42.522  1.00  0.00           H  
ATOM   3420 3HG1 ILE C 215      32.903  19.330  41.657  1.00  0.00           H  
ATOM   3421  CD1 ILE C 215      31.020  18.346  41.847  1.00  0.00           C  
ATOM   3422 1HD1 ILE C 215      30.619  17.347  42.012  1.00  0.00           H  
ATOM   3423 2HD1 ILE C 215      30.785  18.958  42.718  1.00  0.00           H  
ATOM   3424 3HD1 ILE C 215      30.552  18.786  40.966  1.00  0.00           H  
ATOM   3425  C   ILE C 215      35.100  16.927  39.060  1.00  0.00           C  
ATOM   3426  O   ILE C 215      35.623  15.885  39.455  1.00  0.00           O  
ATOM   3427  N   ALA C 216      35.011  17.245  37.762  1.00  0.00           N  
ATOM   3428  H   ALA C 216      34.498  18.086  37.524  1.00  0.00           H  
ATOM   3429  CA  ALA C 216      35.323  16.309  36.675  1.00  0.00           C  
ATOM   3430  HA  ALA C 216      35.715  15.383  37.099  1.00  0.00           H  
ATOM   3431  CB  ALA C 216      33.998  15.977  35.974  1.00  0.00           C  
ATOM   3432  HB1 ALA C 216      33.603  16.865  35.478  1.00  0.00           H  
ATOM   3433  HB2 ALA C 216      34.167  15.198  35.233  1.00  0.00           H  
ATOM   3434  HB3 ALA C 216      33.270  15.617  36.702  1.00  0.00           H  
ATOM   3435  C   ALA C 216      36.387  16.793  35.667  1.00  0.00           C  
ATOM   3436  O   ALA C 216      36.890  15.990  34.888  1.00  0.00           O  
ATOM   3437  N   GLY C 217      36.727  18.088  35.642  1.00  0.00           N  
ATOM   3438  H   GLY C 217      36.328  18.712  36.334  1.00  0.00           H  
ATOM   3439  CA  GLY C 217      37.664  18.684  34.675  1.00  0.00           C  
ATOM   3440  HA2 GLY C 217      38.080  19.592  35.110  1.00  0.00           H  
ATOM   3441  HA3 GLY C 217      38.484  17.988  34.501  1.00  0.00           H  
ATOM   3442  C   GLY C 217      37.060  19.050  33.308  1.00  0.00           C  
ATOM   3443  O   GLY C 217      37.751  19.618  32.461  1.00  0.00           O  
ATOM   3444  N   TYR C 218      35.775  18.765  33.076  1.00  0.00           N  
ATOM   3445  H   TYR C 218      35.257  18.305  33.811  1.00  0.00           H  
ATOM   3446  CA  TYR C 218      35.045  19.044  31.830  1.00  0.00           C  
ATOM   3447  HA  TYR C 218      35.546  19.852  31.297  1.00  0.00           H  
ATOM   3448  CB  TYR C 218      35.060  17.799  30.923  1.00  0.00           C  
ATOM   3449  HB2 TYR C 218      34.334  17.934  30.123  1.00  0.00           H  
ATOM   3450  HB3 TYR C 218      36.043  17.745  30.455  1.00  0.00           H  
ATOM   3451  CG  TYR C 218      34.781  16.461  31.592  1.00  0.00           C  
ATOM   3452  CD1 TYR C 218      35.856  15.608  31.908  1.00  0.00           C  
ATOM   3453  HD1 TYR C 218      36.875  15.928  31.730  1.00  0.00           H  
ATOM   3454  CE1 TYR C 218      35.621  14.353  32.498  1.00  0.00           C  
ATOM   3455  HE1 TYR C 218      36.454  13.717  32.762  1.00  0.00           H  
ATOM   3456  CZ  TYR C 218      34.302  13.948  32.785  1.00  0.00           C  
ATOM   3457  OH  TYR C 218      34.063  12.716  33.302  1.00  0.00           O  
ATOM   3458  HH  TYR C 218      34.888  12.237  33.495  1.00  0.00           H  
ATOM   3459  CE2 TYR C 218      33.224  14.804  32.478  1.00  0.00           C  
ATOM   3460  HE2 TYR C 218      32.221  14.488  32.721  1.00  0.00           H  
ATOM   3461  CD2 TYR C 218      33.460  16.059  31.878  1.00  0.00           C  
ATOM   3462  HD2 TYR C 218      32.631  16.716  31.649  1.00  0.00           H  
ATOM   3463  C   TYR C 218      33.613  19.523  32.101  1.00  0.00           C  
ATOM   3464  O   TYR C 218      33.060  19.252  33.166  1.00  0.00           O  
ATOM   3465  N   ARG C 219      32.998  20.238  31.146  1.00  0.00           N  
ATOM   3466  H   ARG C 219      33.485  20.404  30.272  1.00  0.00           H  
ATOM   3467  CA  ARG C 219      31.615  20.733  31.280  1.00  0.00           C  
ATOM   3468  HA  ARG C 219      31.532  21.193  32.265  1.00  0.00           H  
ATOM   3469  CB  ARG C 219      31.311  21.800  30.213  1.00  0.00           C  
ATOM   3470  HB2 ARG C 219      31.493  21.380  29.224  1.00  0.00           H  
ATOM   3471  HB3 ARG C 219      30.255  22.058  30.271  1.00  0.00           H  
ATOM   3472  CG  ARG C 219      32.118  23.097  30.394  1.00  0.00           C  
ATOM   3473  HG2 ARG C 219      31.996  23.450  31.418  1.00  0.00           H  
ATOM   3474  HG3 ARG C 219      33.177  22.901  30.225  1.00  0.00           H  
ATOM   3475  CD  ARG C 219      31.644  24.213  29.448  1.00  0.00           C  
ATOM   3476  HD2 ARG C 219      30.605  24.452  29.686  1.00  0.00           H  
ATOM   3477  HD3 ARG C 219      32.236  25.110  29.636  1.00  0.00           H  
ATOM   3478  NE  ARG C 219      31.726  23.838  28.021  1.00  0.00           N  
ATOM   3479  HE  ARG C 219      30.895  23.398  27.627  1.00  0.00           H  
ATOM   3480  CZ  ARG C 219      32.777  23.939  27.227  1.00  0.00           C  
ATOM   3481  NH1 ARG C 219      33.936  24.359  27.641  1.00  0.00           N  
ATOM   3482 1HH1 ARG C 219      34.070  24.571  28.611  1.00  0.00           H  
ATOM   3483 2HH1 ARG C 219      34.698  24.375  26.969  1.00  0.00           H  
ATOM   3484  NH2 ARG C 219      32.711  23.644  25.964  1.00  0.00           N  
ATOM   3485 1HH2 ARG C 219      31.803  23.497  25.522  1.00  0.00           H  
ATOM   3486 2HH2 ARG C 219      33.542  23.805  25.406  1.00  0.00           H  
ATOM   3487  C   ARG C 219      30.589  19.582  31.219  1.00  0.00           C  
ATOM   3488  O   ARG C 219      30.842  18.590  30.533  1.00  0.00           O  
ATOM   3489  N   PRO C 220      29.426  19.705  31.895  1.00  0.00           N  
ATOM   3490  CD  PRO C 220      29.035  20.833  32.722  1.00  0.00           C  
ATOM   3491  HD2 PRO C 220      29.174  21.772  32.195  1.00  0.00           H  
ATOM   3492  HD3 PRO C 220      29.626  20.826  33.637  1.00  0.00           H  
ATOM   3493  CG  PRO C 220      27.560  20.637  33.052  1.00  0.00           C  
ATOM   3494  HG2 PRO C 220      26.942  21.093  32.280  1.00  0.00           H  
ATOM   3495  HG3 PRO C 220      27.313  21.051  34.030  1.00  0.00           H  
ATOM   3496  CB  PRO C 220      27.387  19.122  33.016  1.00  0.00           C  
ATOM   3497  HB2 PRO C 220      26.380  18.858  32.690  1.00  0.00           H  
ATOM   3498  HB3 PRO C 220      27.574  18.708  34.004  1.00  0.00           H  
ATOM   3499  CA  PRO C 220      28.458  18.617  32.039  1.00  0.00           C  
ATOM   3500  HA  PRO C 220      28.959  17.762  32.491  1.00  0.00           H  
ATOM   3501  C   PRO C 220      27.824  18.144  30.727  1.00  0.00           C  
ATOM   3502  O   PRO C 220      27.672  16.942  30.537  1.00  0.00           O  
ATOM   3503  N   PHE C 221      27.450  19.045  29.816  1.00  0.00           N  
ATOM   3504  H   PHE C 221      27.599  20.031  29.994  1.00  0.00           H  
ATOM   3505  CA  PHE C 221      26.750  18.673  28.585  1.00  0.00           C  
ATOM   3506  HA  PHE C 221      26.482  17.616  28.617  1.00  0.00           H  
ATOM   3507  CB  PHE C 221      25.432  19.456  28.479  1.00  0.00           C  
ATOM   3508  HB2 PHE C 221      25.663  20.517  28.378  1.00  0.00           H  
ATOM   3509  HB3 PHE C 221      24.916  19.147  27.569  1.00  0.00           H  
ATOM   3510  CG  PHE C 221      24.483  19.274  29.653  1.00  0.00           C  
ATOM   3511  CD1 PHE C 221      24.346  20.294  30.613  1.00  0.00           C  
ATOM   3512  HD1 PHE C 221      24.919  21.205  30.525  1.00  0.00           H  
ATOM   3513  CE1 PHE C 221      23.450  20.141  31.686  1.00  0.00           C  
ATOM   3514  HE1 PHE C 221      23.334  20.933  32.413  1.00  0.00           H  
ATOM   3515  CZ  PHE C 221      22.686  18.967  31.805  1.00  0.00           C  
ATOM   3516  HZ  PHE C 221      21.980  18.861  32.620  1.00  0.00           H  
ATOM   3517  CE2 PHE C 221      22.831  17.939  30.858  1.00  0.00           C  
ATOM   3518  HE2 PHE C 221      22.242  17.038  30.957  1.00  0.00           H  
ATOM   3519  CD2 PHE C 221      23.726  18.093  29.783  1.00  0.00           C  
ATOM   3520  HD2 PHE C 221      23.824  17.305  29.053  1.00  0.00           H  
ATOM   3521  C   PHE C 221      27.649  18.882  27.364  1.00  0.00           C  
ATOM   3522  O   PHE C 221      27.898  20.021  26.967  1.00  0.00           O  
ATOM   3523  N   LEU C 222      28.093  17.783  26.743  1.00  0.00           N  
ATOM   3524  H   LEU C 222      27.926  16.890  27.199  1.00  0.00           H  
ATOM   3525  CA  LEU C 222      28.791  17.751  25.447  1.00  0.00           C  
ATOM   3526  HA  LEU C 222      29.230  16.758  25.353  1.00  0.00           H  
ATOM   3527  CB  LEU C 222      27.789  17.910  24.283  1.00  0.00           C  
ATOM   3528  HB2 LEU C 222      27.486  18.954  24.228  1.00  0.00           H  
ATOM   3529  HB3 LEU C 222      28.319  17.661  23.366  1.00  0.00           H  
ATOM   3530  CG  LEU C 222      26.511  17.057  24.350  1.00  0.00           C  
ATOM   3531  HG  LEU C 222      25.927  17.353  25.221  1.00  0.00           H  
ATOM   3532  CD1 LEU C 222      25.659  17.290  23.100  1.00  0.00           C  
ATOM   3533 1HD1 LEU C 222      26.217  16.999  22.211  1.00  0.00           H  
ATOM   3534 2HD1 LEU C 222      24.747  16.697  23.161  1.00  0.00           H  
ATOM   3535 3HD1 LEU C 222      25.391  18.345  23.029  1.00  0.00           H  
ATOM   3536  CD2 LEU C 222      26.807  15.564  24.448  1.00  0.00           C  
ATOM   3537 1HD2 LEU C 222      27.469  15.362  25.284  1.00  0.00           H  
ATOM   3538 2HD2 LEU C 222      25.873  15.041  24.631  1.00  0.00           H  
ATOM   3539 3HD2 LEU C 222      27.266  15.200  23.528  1.00  0.00           H  
ATOM   3540  C   LEU C 222      29.984  18.728  25.366  1.00  0.00           C  
ATOM   3541  O   LEU C 222      29.992  19.678  24.580  1.00  0.00           O  
ATOM   3542  N   HIS C 223      30.981  18.495  26.224  1.00  0.00           N  
ATOM   3543  H   HIS C 223      30.885  17.714  26.855  1.00  0.00           H  
ATOM   3544  CA  HIS C 223      32.178  19.334  26.352  1.00  0.00           C  
ATOM   3545  HA  HIS C 223      31.851  20.326  26.669  1.00  0.00           H  
ATOM   3546  CB  HIS C 223      33.093  18.758  27.441  1.00  0.00           C  
ATOM   3547  HB2 HIS C 223      32.494  18.537  28.325  1.00  0.00           H  
ATOM   3548  HB3 HIS C 223      33.529  17.823  27.086  1.00  0.00           H  
ATOM   3549  CG  HIS C 223      34.196  19.695  27.865  1.00  0.00           C  
ATOM   3550  ND1 HIS C 223      34.004  21.017  28.266  1.00  0.00           N  
ATOM   3551  CE1 HIS C 223      35.202  21.458  28.679  1.00  0.00           C  
ATOM   3552  HE1 HIS C 223      35.396  22.432  29.112  1.00  0.00           H  
ATOM   3553  NE2 HIS C 223      36.123  20.494  28.555  1.00  0.00           N  
ATOM   3554  HE2 HIS C 223      37.069  20.580  28.918  1.00  0.00           H  
ATOM   3555  CD2 HIS C 223      35.513  19.374  28.032  1.00  0.00           C  
ATOM   3556  HD2 HIS C 223      35.966  18.409  27.851  1.00  0.00           H  
ATOM   3557  C   HIS C 223      32.952  19.496  25.033  1.00  0.00           C  
ATOM   3558  O   HIS C 223      33.007  18.585  24.209  1.00  0.00           O  
ATOM   3559  N   HIS C 224      33.595  20.655  24.875  1.00  0.00           N  
ATOM   3560  H   HIS C 224      33.556  21.303  25.650  1.00  0.00           H  
ATOM   3561  CA  HIS C 224      34.439  21.030  23.729  1.00  0.00           C  
ATOM   3562  HA  HIS C 224      34.664  22.083  23.873  1.00  0.00           H  
ATOM   3563  CB  HIS C 224      35.793  20.297  23.796  1.00  0.00           C  
ATOM   3564  HB2 HIS C 224      36.017  20.043  24.833  1.00  0.00           H  
ATOM   3565  HB3 HIS C 224      35.734  19.368  23.228  1.00  0.00           H  
ATOM   3566  CG  HIS C 224      36.940  21.139  23.294  1.00  0.00           C  
ATOM   3567  ND1 HIS C 224      37.243  22.428  23.749  1.00  0.00           N  
ATOM   3568  CE1 HIS C 224      38.326  22.808  23.052  1.00  0.00           C  
ATOM   3569  HE1 HIS C 224      38.818  23.767  23.150  1.00  0.00           H  
ATOM   3570  NE2 HIS C 224      38.716  21.838  22.211  1.00  0.00           N  
ATOM   3571  HE2 HIS C 224      39.507  21.907  21.580  1.00  0.00           H  
ATOM   3572  CD2 HIS C 224      37.852  20.773  22.346  1.00  0.00           C  
ATOM   3573  HD2 HIS C 224      37.876  19.835  21.807  1.00  0.00           H  
ATOM   3574  C   HIS C 224      33.770  21.010  22.338  1.00  0.00           C  
ATOM   3575  O   HIS C 224      34.455  20.986  21.316  1.00  0.00           O  
ATOM   3576  N   LEU C 225      32.435  21.083  22.270  1.00  0.00           N  
ATOM   3577  H   LEU C 225      31.910  21.046  23.132  1.00  0.00           H  
ATOM   3578  CA  LEU C 225      31.714  21.390  21.028  1.00  0.00           C  
ATOM   3579  HA  LEU C 225      32.275  20.973  20.193  1.00  0.00           H  
ATOM   3580  CB  LEU C 225      30.314  20.737  21.041  1.00  0.00           C  
ATOM   3581  HB2 LEU C 225      29.782  21.077  21.931  1.00  0.00           H  
ATOM   3582  HB3 LEU C 225      29.764  21.096  20.172  1.00  0.00           H  
ATOM   3583  CG  LEU C 225      30.287  19.195  21.015  1.00  0.00           C  
ATOM   3584  HG  LEU C 225      30.666  18.803  21.958  1.00  0.00           H  
ATOM   3585  CD1 LEU C 225      28.838  18.735  20.826  1.00  0.00           C  
ATOM   3586 1HD1 LEU C 225      28.459  19.053  19.856  1.00  0.00           H  
ATOM   3587 2HD1 LEU C 225      28.792  17.647  20.891  1.00  0.00           H  
ATOM   3588 3HD1 LEU C 225      28.218  19.163  21.613  1.00  0.00           H  
ATOM   3589  CD2 LEU C 225      31.100  18.594  19.864  1.00  0.00           C  
ATOM   3590 1HD2 LEU C 225      32.162  18.778  20.027  1.00  0.00           H  
ATOM   3591 2HD2 LEU C 225      30.953  17.512  19.842  1.00  0.00           H  
ATOM   3592 3HD2 LEU C 225      30.790  19.019  18.912  1.00  0.00           H  
ATOM   3593  C   LEU C 225      31.626  22.906  20.762  1.00  0.00           C  
ATOM   3594  O   LEU C 225      31.762  23.739  21.655  1.00  0.00           O  
ATOM   3595  N   GLN C 226      31.339  23.268  19.510  1.00  0.00           N  
ATOM   3596  H   GLN C 226      31.271  22.534  18.825  1.00  0.00           H  
ATOM   3597  CA  GLN C 226      30.896  24.611  19.106  1.00  0.00           C  
ATOM   3598  HA  GLN C 226      31.487  25.357  19.634  1.00  0.00           H  
ATOM   3599  CB  GLN C 226      31.113  24.765  17.592  1.00  0.00           C  
ATOM   3600  HB2 GLN C 226      30.703  23.884  17.100  1.00  0.00           H  
ATOM   3601  HB3 GLN C 226      30.547  25.620  17.228  1.00  0.00           H  
ATOM   3602  CG  GLN C 226      32.585  24.916  17.172  1.00  0.00           C  
ATOM   3603  HG2 GLN C 226      33.229  24.327  17.825  1.00  0.00           H  
ATOM   3604  HG3 GLN C 226      32.689  24.518  16.163  1.00  0.00           H  
ATOM   3605  CD  GLN C 226      33.085  26.359  17.158  1.00  0.00           C  
ATOM   3606  OE1 GLN C 226      32.508  27.274  17.737  1.00  0.00           O  
ATOM   3607  NE2 GLN C 226      34.181  26.626  16.484  1.00  0.00           N  
ATOM   3608 1HE2 GLN C 226      34.549  27.561  16.528  1.00  0.00           H  
ATOM   3609 2HE2 GLN C 226      34.660  25.894  15.977  1.00  0.00           H  
ATOM   3610  C   GLN C 226      29.396  24.807  19.419  1.00  0.00           C  
ATOM   3611  O   GLN C 226      28.637  23.845  19.259  1.00  0.00           O  
ATOM   3612  N   PRO C 227      28.918  26.024  19.765  1.00  0.00           N  
ATOM   3613  CD  PRO C 227      29.703  27.229  20.012  1.00  0.00           C  
ATOM   3614  HD2 PRO C 227      29.989  27.680  19.063  1.00  0.00           H  
ATOM   3615  HD3 PRO C 227      30.591  27.021  20.609  1.00  0.00           H  
ATOM   3616  CG  PRO C 227      28.786  28.185  20.776  1.00  0.00           C  
ATOM   3617  HG2 PRO C 227      29.014  29.229  20.558  1.00  0.00           H  
ATOM   3618  HG3 PRO C 227      28.858  27.991  21.848  1.00  0.00           H  
ATOM   3619  CB  PRO C 227      27.397  27.793  20.279  1.00  0.00           C  
ATOM   3620  HB2 PRO C 227      27.211  28.269  19.314  1.00  0.00           H  
ATOM   3621  HB3 PRO C 227      26.623  28.070  20.995  1.00  0.00           H  
ATOM   3622  CA  PRO C 227      27.515  26.273  20.118  1.00  0.00           C  
ATOM   3623  HA  PRO C 227      27.328  25.813  21.089  1.00  0.00           H  
ATOM   3624  C   PRO C 227      26.469  25.723  19.132  1.00  0.00           C  
ATOM   3625  O   PRO C 227      25.524  25.071  19.575  1.00  0.00           O  
ATOM   3626  N   PHE C 228      26.626  25.902  17.810  1.00  0.00           N  
ATOM   3627  H   PHE C 228      27.402  26.446  17.460  1.00  0.00           H  
ATOM   3628  CA  PHE C 228      25.618  25.382  16.868  1.00  0.00           C  
ATOM   3629  HA  PHE C 228      24.660  25.432  17.389  1.00  0.00           H  
ATOM   3630  CB  PHE C 228      25.391  26.311  15.663  1.00  0.00           C  
ATOM   3631  HB2 PHE C 228      24.512  25.944  15.131  1.00  0.00           H  
ATOM   3632  HB3 PHE C 228      25.114  27.290  16.058  1.00  0.00           H  
ATOM   3633  CG  PHE C 228      26.482  26.508  14.622  1.00  0.00           C  
ATOM   3634  CD1 PHE C 228      26.852  25.457  13.758  1.00  0.00           C  
ATOM   3635  HD1 PHE C 228      26.438  24.468  13.895  1.00  0.00           H  
ATOM   3636  CE1 PHE C 228      27.700  25.710  12.663  1.00  0.00           C  
ATOM   3637  HE1 PHE C 228      27.961  24.915  11.976  1.00  0.00           H  
ATOM   3638  CZ  PHE C 228      28.166  27.012  12.418  1.00  0.00           C  
ATOM   3639  HZ  PHE C 228      28.781  27.217  11.551  1.00  0.00           H  
ATOM   3640  CE2 PHE C 228      27.806  28.060  13.280  1.00  0.00           C  
ATOM   3641  HE2 PHE C 228      28.142  29.068  13.073  1.00  0.00           H  
ATOM   3642  CD2 PHE C 228      26.975  27.807  14.383  1.00  0.00           C  
ATOM   3643  HD2 PHE C 228      26.673  28.632  15.014  1.00  0.00           H  
ATOM   3644  C   PHE C 228      25.746  23.883  16.541  1.00  0.00           C  
ATOM   3645  O   PHE C 228      24.783  23.290  16.063  1.00  0.00           O  
ATOM   3646  N   THR C 229      26.862  23.224  16.884  1.00  0.00           N  
ATOM   3647  H   THR C 229      27.630  23.737  17.294  1.00  0.00           H  
ATOM   3648  CA  THR C 229      26.922  21.747  16.901  1.00  0.00           C  
ATOM   3649  HA  THR C 229      26.330  21.365  16.068  1.00  0.00           H  
ATOM   3650  CB  THR C 229      28.353  21.200  16.751  1.00  0.00           C  
ATOM   3651  HB  THR C 229      28.839  21.167  17.726  1.00  0.00           H  
ATOM   3652  CG2 THR C 229      28.346  19.796  16.145  1.00  0.00           C  
ATOM   3653 1HG2 THR C 229      27.923  19.826  15.138  1.00  0.00           H  
ATOM   3654 2HG2 THR C 229      29.362  19.402  16.096  1.00  0.00           H  
ATOM   3655 3HG2 THR C 229      27.742  19.130  16.761  1.00  0.00           H  
ATOM   3656  OG1 THR C 229      29.134  21.995  15.888  1.00  0.00           O  
ATOM   3657  HG1 THR C 229      29.910  21.471  15.658  1.00  0.00           H  
ATOM   3658  C   THR C 229      26.309  21.187  18.189  1.00  0.00           C  
ATOM   3659  O   THR C 229      25.608  20.178  18.150  1.00  0.00           O  
ATOM   3660  N   TRP C 230      26.525  21.867  19.320  1.00  0.00           N  
ATOM   3661  H   TRP C 230      27.125  22.685  19.279  1.00  0.00           H  
ATOM   3662  CA  TRP C 230      25.949  21.530  20.625  1.00  0.00           C  
ATOM   3663  HA  TRP C 230      26.266  20.528  20.912  1.00  0.00           H  
ATOM   3664  CB  TRP C 230      26.486  22.529  21.664  1.00  0.00           C  
ATOM   3665  HB2 TRP C 230      27.574  22.557  21.585  1.00  0.00           H  
ATOM   3666  HB3 TRP C 230      26.123  23.527  21.430  1.00  0.00           H  
ATOM   3667  CG  TRP C 230      26.138  22.250  23.091  1.00  0.00           C  
ATOM   3668  CD1 TRP C 230      26.961  21.659  23.984  1.00  0.00           C  
ATOM   3669  HD1 TRP C 230      27.970  21.310  23.781  1.00  0.00           H  
ATOM   3670  NE1 TRP C 230      26.331  21.570  25.205  1.00  0.00           N  
ATOM   3671  HE1 TRP C 230      26.781  21.153  26.018  1.00  0.00           H  
ATOM   3672  CE2 TRP C 230      25.074  22.130  25.180  1.00  0.00           C  
ATOM   3673  CZ2 TRP C 230      24.086  22.314  26.158  1.00  0.00           C  
ATOM   3674  HZ2 TRP C 230      24.250  21.980  27.171  1.00  0.00           H  
ATOM   3675  CH2 TRP C 230      22.894  22.973  25.813  1.00  0.00           C  
ATOM   3676  HH2 TRP C 230      22.136  23.147  26.564  1.00  0.00           H  
ATOM   3677  CZ3 TRP C 230      22.707  23.432  24.498  1.00  0.00           C  
ATOM   3678  HZ3 TRP C 230      21.799  23.962  24.242  1.00  0.00           H  
ATOM   3679  CE3 TRP C 230      23.708  23.245  23.524  1.00  0.00           C  
ATOM   3680  HE3 TRP C 230      23.565  23.649  22.535  1.00  0.00           H  
ATOM   3681  CD2 TRP C 230      24.918  22.583  23.834  1.00  0.00           C  
ATOM   3682  C   TRP C 230      24.415  21.526  20.567  1.00  0.00           C  
ATOM   3683  O   TRP C 230      23.786  20.518  20.889  1.00  0.00           O  
ATOM   3684  N   HIS C 231      23.811  22.604  20.047  1.00  0.00           N  
ATOM   3685  H   HIS C 231      24.387  23.404  19.805  1.00  0.00           H  
ATOM   3686  CA  HIS C 231      22.350  22.732  19.923  1.00  0.00           C  
ATOM   3687  HA  HIS C 231      21.905  22.570  20.905  1.00  0.00           H  
ATOM   3688  CB  HIS C 231      22.004  24.158  19.469  1.00  0.00           C  
ATOM   3689  HB2 HIS C 231      22.519  24.870  20.113  1.00  0.00           H  
ATOM   3690  HB3 HIS C 231      22.359  24.308  18.448  1.00  0.00           H  
ATOM   3691  CG  HIS C 231      20.526  24.465  19.524  1.00  0.00           C  
ATOM   3692  ND1 HIS C 231      19.694  24.670  18.418  1.00  0.00           N  
ATOM   3693  CE1 HIS C 231      18.471  24.910  18.926  1.00  0.00           C  
ATOM   3694  HE1 HIS C 231      17.582  25.117  18.343  1.00  0.00           H  
ATOM   3695  NE2 HIS C 231      18.498  24.872  20.267  1.00  0.00           N  
ATOM   3696  HE2 HIS C 231      17.678  25.026  20.869  1.00  0.00           H  
ATOM   3697  CD2 HIS C 231      19.786  24.591  20.664  1.00  0.00           C  
ATOM   3698  HD2 HIS C 231      20.145  24.488  21.679  1.00  0.00           H  
ATOM   3699  C   HIS C 231      21.725  21.683  18.989  1.00  0.00           C  
ATOM   3700  O   HIS C 231      20.584  21.276  19.195  1.00  0.00           O  
ATOM   3701  N   GLU C 232      22.470  21.179  17.999  1.00  0.00           N  
ATOM   3702  H   GLU C 232      23.402  21.539  17.853  1.00  0.00           H  
ATOM   3703  CA  GLU C 232      21.974  20.112  17.125  1.00  0.00           C  
ATOM   3704  HA  GLU C 232      20.913  20.283  16.980  1.00  0.00           H  
ATOM   3705  CB  GLU C 232      22.623  20.213  15.738  1.00  0.00           C  
ATOM   3706  HB2 GLU C 232      22.571  21.253  15.415  1.00  0.00           H  
ATOM   3707  HB3 GLU C 232      23.673  19.917  15.788  1.00  0.00           H  
ATOM   3708  CG  GLU C 232      21.878  19.331  14.720  1.00  0.00           C  
ATOM   3709  HG2 GLU C 232      22.329  18.336  14.706  1.00  0.00           H  
ATOM   3710  HG3 GLU C 232      20.835  19.217  15.027  1.00  0.00           H  
ATOM   3711  CD  GLU C 232      21.881  19.948  13.321  1.00  0.00           C  
ATOM   3712  OE1 GLU C 232      22.549  19.418  12.405  1.00  0.00           O  
ATOM   3713  OE2 GLU C 232      21.151  20.950  13.103  1.00  0.00           O  
ATOM   3714  C   GLU C 232      22.090  18.710  17.744  1.00  0.00           C  
ATOM   3715  O   GLU C 232      21.226  17.867  17.492  1.00  0.00           O  
ATOM   3716  N   LYS C 233      23.105  18.451  18.580  1.00  0.00           N  
ATOM   3717  H   LYS C 233      23.789  19.184  18.741  1.00  0.00           H  
ATOM   3718  CA  LYS C 233      23.311  17.141  19.228  1.00  0.00           C  
ATOM   3719  HA  LYS C 233      22.879  16.368  18.591  1.00  0.00           H  
ATOM   3720  CB  LYS C 233      24.811  16.834  19.343  1.00  0.00           C  
ATOM   3721  HB2 LYS C 233      25.319  17.641  19.875  1.00  0.00           H  
ATOM   3722  HB3 LYS C 233      24.935  15.912  19.915  1.00  0.00           H  
ATOM   3723  CG  LYS C 233      25.444  16.638  17.956  1.00  0.00           C  
ATOM   3724  HG2 LYS C 233      24.816  15.976  17.358  1.00  0.00           H  
ATOM   3725  HG3 LYS C 233      25.519  17.601  17.450  1.00  0.00           H  
ATOM   3726  CD  LYS C 233      26.836  16.012  18.070  1.00  0.00           C  
ATOM   3727  HD2 LYS C 233      27.443  16.606  18.756  1.00  0.00           H  
ATOM   3728  HD3 LYS C 233      26.741  15.001  18.473  1.00  0.00           H  
ATOM   3729  CE  LYS C 233      27.525  15.962  16.702  1.00  0.00           C  
ATOM   3730  HE2 LYS C 233      26.864  15.487  15.972  1.00  0.00           H  
ATOM   3731  HE3 LYS C 233      27.713  16.988  16.377  1.00  0.00           H  
ATOM   3732  NZ  LYS C 233      28.807  15.227  16.786  1.00  0.00           N  
ATOM   3733  HZ1 LYS C 233      28.689  14.240  16.614  1.00  0.00           H  
ATOM   3734  HZ2 LYS C 233      29.512  15.617  16.169  1.00  0.00           H  
ATOM   3735  HZ3 LYS C 233      29.175  15.295  17.741  1.00  0.00           H  
ATOM   3736  C   LYS C 233      22.585  16.970  20.567  1.00  0.00           C  
ATOM   3737  O   LYS C 233      22.417  15.835  21.008  1.00  0.00           O  
ATOM   3738  N   ILE C 234      22.088  18.043  21.185  1.00  0.00           N  
ATOM   3739  H   ILE C 234      22.348  18.953  20.822  1.00  0.00           H  
ATOM   3740  CA  ILE C 234      21.365  17.988  22.472  1.00  0.00           C  
ATOM   3741  HA  ILE C 234      21.782  17.147  23.024  1.00  0.00           H  
ATOM   3742  CB  ILE C 234      21.686  19.274  23.277  1.00  0.00           C  
ATOM   3743  HB  ILE C 234      22.704  19.579  23.034  1.00  0.00           H  
ATOM   3744  CG2 ILE C 234      20.765  20.440  22.879  1.00  0.00           C  
ATOM   3745 1HG2 ILE C 234      19.748  20.266  23.230  1.00  0.00           H  
ATOM   3746 2HG2 ILE C 234      21.134  21.363  23.326  1.00  0.00           H  
ATOM   3747 3HG2 ILE C 234      20.759  20.561  21.796  1.00  0.00           H  
ATOM   3748  CG1 ILE C 234      21.664  19.073  24.807  1.00  0.00           C  
ATOM   3749 2HG1 ILE C 234      21.751  20.048  25.281  1.00  0.00           H  
ATOM   3750 3HG1 ILE C 234      20.721  18.623  25.117  1.00  0.00           H  
ATOM   3751  CD1 ILE C 234      22.834  18.229  25.328  1.00  0.00           C  
ATOM   3752 1HD1 ILE C 234      23.775  18.726  25.093  1.00  0.00           H  
ATOM   3753 2HD1 ILE C 234      22.751  18.129  26.410  1.00  0.00           H  
ATOM   3754 3HD1 ILE C 234      22.831  17.236  24.881  1.00  0.00           H  
ATOM   3755  C   ILE C 234      19.853  17.677  22.350  1.00  0.00           C  
ATOM   3756  O   ILE C 234      19.167  17.518  23.359  1.00  0.00           O  
ATOM   3757  N   LYS C 235      19.310  17.564  21.127  1.00  0.00           N  
ATOM   3758  H   LYS C 235      19.930  17.640  20.334  1.00  0.00           H  
ATOM   3759  CA  LYS C 235      17.856  17.477  20.860  1.00  0.00           C  
ATOM   3760  HA  LYS C 235      17.373  18.314  21.367  1.00  0.00           H  
ATOM   3761  CB  LYS C 235      17.594  17.628  19.350  1.00  0.00           C  
ATOM   3762  HB2 LYS C 235      18.139  16.856  18.802  1.00  0.00           H  
ATOM   3763  HB3 LYS C 235      16.527  17.488  19.165  1.00  0.00           H  
ATOM   3764  CG  LYS C 235      18.002  19.016  18.825  1.00  0.00           C  
ATOM   3765  HG2 LYS C 235      17.525  19.787  19.431  1.00  0.00           H  
ATOM   3766  HG3 LYS C 235      19.083  19.125  18.899  1.00  0.00           H  
ATOM   3767  CD  LYS C 235      17.583  19.205  17.361  1.00  0.00           C  
ATOM   3768  HD2 LYS C 235      18.061  18.433  16.755  1.00  0.00           H  
ATOM   3769  HD3 LYS C 235      16.500  19.102  17.277  1.00  0.00           H  
ATOM   3770  CE  LYS C 235      18.010  20.587  16.854  1.00  0.00           C  
ATOM   3771  HE2 LYS C 235      17.557  21.365  17.477  1.00  0.00           H  
ATOM   3772  HE3 LYS C 235      19.091  20.676  16.964  1.00  0.00           H  
ATOM   3773  NZ  LYS C 235      17.628  20.771  15.434  1.00  0.00           N  
ATOM   3774  HZ1 LYS C 235      16.649  21.000  15.349  1.00  0.00           H  
ATOM   3775  HZ2 LYS C 235      18.180  21.504  14.990  1.00  0.00           H  
ATOM   3776  HZ3 LYS C 235      17.768  19.906  14.911  1.00  0.00           H  
ATOM   3777  C   LYS C 235      17.155  16.221  21.417  1.00  0.00           C  
ATOM   3778  O   LYS C 235      15.945  16.267  21.639  1.00  0.00           O  
ATOM   3779  N   LYS C 236      17.884  15.128  21.677  1.00  0.00           N  
ATOM   3780  H   LYS C 236      18.843  15.145  21.340  1.00  0.00           H  
ATOM   3781  CA  LYS C 236      17.387  13.852  22.248  1.00  0.00           C  
ATOM   3782  HA  LYS C 236      16.299  13.834  22.162  1.00  0.00           H  
ATOM   3783  CB  LYS C 236      17.936  12.664  21.437  1.00  0.00           C  
ATOM   3784  HB2 LYS C 236      19.026  12.678  21.480  1.00  0.00           H  
ATOM   3785  HB3 LYS C 236      17.592  11.737  21.900  1.00  0.00           H  
ATOM   3786  CG  LYS C 236      17.478  12.632  19.976  1.00  0.00           C  
ATOM   3787  HG2 LYS C 236      16.389  12.595  19.937  1.00  0.00           H  
ATOM   3788  HG3 LYS C 236      17.825  13.521  19.446  1.00  0.00           H  
ATOM   3789  CD  LYS C 236      18.063  11.378  19.320  1.00  0.00           C  
ATOM   3790  HD2 LYS C 236      19.154  11.425  19.347  1.00  0.00           H  
ATOM   3791  HD3 LYS C 236      17.729  10.495  19.869  1.00  0.00           H  
ATOM   3792  CE  LYS C 236      17.596  11.279  17.871  1.00  0.00           C  
ATOM   3793  HE2 LYS C 236      16.504  11.330  17.845  1.00  0.00           H  
ATOM   3794  HE3 LYS C 236      17.991  12.130  17.311  1.00  0.00           H  
ATOM   3795  NZ  LYS C 236      18.048  10.015  17.252  1.00  0.00           N  
ATOM   3796  HZ1 LYS C 236      17.711   9.203  17.767  1.00  0.00           H  
ATOM   3797  HZ2 LYS C 236      17.730   9.978  16.285  1.00  0.00           H  
ATOM   3798  HZ3 LYS C 236      19.063   9.934  17.271  1.00  0.00           H  
ATOM   3799  C   LYS C 236      17.676  13.673  23.752  1.00  0.00           C  
ATOM   3800  O   LYS C 236      17.892  12.547  24.211  1.00  0.00           O  
ATOM   3801  N   LYS C 237      17.727  14.767  24.520  1.00  0.00           N  
ATOM   3802  H   LYS C 237      17.573  15.663  24.080  1.00  0.00           H  
ATOM   3803  CA  LYS C 237      18.033  14.726  25.961  1.00  0.00           C  
ATOM   3804  HA  LYS C 237      18.963  14.172  26.071  1.00  0.00           H  
ATOM   3805  CB  LYS C 237      18.271  16.144  26.509  1.00  0.00           C  
ATOM   3806  HB2 LYS C 237      18.668  16.065  27.524  1.00  0.00           H  
ATOM   3807  HB3 LYS C 237      19.017  16.650  25.895  1.00  0.00           H  
ATOM   3808  CG  LYS C 237      16.983  16.980  26.549  1.00  0.00           C  
ATOM   3809  HG2 LYS C 237      16.575  17.076  25.541  1.00  0.00           H  
ATOM   3810  HG3 LYS C 237      16.254  16.469  27.177  1.00  0.00           H  
ATOM   3811  CD  LYS C 237      17.220  18.379  27.124  1.00  0.00           C  
ATOM   3812  HD2 LYS C 237      17.686  18.307  28.108  1.00  0.00           H  
ATOM   3813  HD3 LYS C 237      17.891  18.931  26.463  1.00  0.00           H  
ATOM   3814  CE  LYS C 237      15.891  19.133  27.234  1.00  0.00           C  
ATOM   3815  HE2 LYS C 237      16.092  20.163  27.526  1.00  0.00           H  
ATOM   3816  HE3 LYS C 237      15.412  19.159  26.252  1.00  0.00           H  
ATOM   3817  NZ  LYS C 237      14.976  18.519  28.223  1.00  0.00           N  
ATOM   3818  HZ1 LYS C 237      14.768  17.566  27.968  1.00  0.00           H  
ATOM   3819  HZ2 LYS C 237      15.402  18.487  29.149  1.00  0.00           H  
ATOM   3820  HZ3 LYS C 237      14.095  19.031  28.230  1.00  0.00           H  
ATOM   3821  C   LYS C 237      16.994  13.954  26.786  1.00  0.00           C  
ATOM   3822  O   LYS C 237      15.797  14.005  26.511  1.00  0.00           O  
ATOM   3823  N   ASP C 238      17.466  13.313  27.851  1.00  0.00           N  
ATOM   3824  H   ASP C 238      18.455  13.350  28.019  1.00  0.00           H  
ATOM   3825  CA  ASP C 238      16.626  12.713  28.893  1.00  0.00           C  
ATOM   3826  HA  ASP C 238      15.800  12.195  28.407  1.00  0.00           H  
ATOM   3827  CB  ASP C 238      17.469  11.659  29.633  1.00  0.00           C  
ATOM   3828  HB2 ASP C 238      17.878  10.966  28.895  1.00  0.00           H  
ATOM   3829  HB3 ASP C 238      18.310  12.154  30.121  1.00  0.00           H  
ATOM   3830  CG  ASP C 238      16.689  10.859  30.682  1.00  0.00           C  
ATOM   3831  OD1 ASP C 238      16.214  11.471  31.665  1.00  0.00           O  
ATOM   3832  OD2 ASP C 238      16.578   9.619  30.518  1.00  0.00           O  
ATOM   3833  C   ASP C 238      16.073  13.818  29.831  1.00  0.00           C  
ATOM   3834  O   ASP C 238      16.802  14.770  30.132  1.00  0.00           O  
ATOM   3835  N   PRO C 239      14.814  13.752  30.310  1.00  0.00           N  
ATOM   3836  CD  PRO C 239      13.764  12.837  29.882  1.00  0.00           C  
ATOM   3837  HD2 PRO C 239      13.820  11.917  30.465  1.00  0.00           H  
ATOM   3838  HD3 PRO C 239      13.818  12.619  28.816  1.00  0.00           H  
ATOM   3839  CG  PRO C 239      12.452  13.561  30.176  1.00  0.00           C  
ATOM   3840  HG2 PRO C 239      11.632  12.863  30.352  1.00  0.00           H  
ATOM   3841  HG3 PRO C 239      12.214  14.245  29.360  1.00  0.00           H  
ATOM   3842  CB  PRO C 239      12.795  14.358  31.430  1.00  0.00           C  
ATOM   3843  HB2 PRO C 239      12.734  13.705  32.302  1.00  0.00           H  
ATOM   3844  HB3 PRO C 239      12.143  15.223  31.550  1.00  0.00           H  
ATOM   3845  CA  PRO C 239      14.248  14.778  31.192  1.00  0.00           C  
ATOM   3846  HA  PRO C 239      14.248  15.725  30.653  1.00  0.00           H  
ATOM   3847  C   PRO C 239      14.965  15.001  32.532  1.00  0.00           C  
ATOM   3848  O   PRO C 239      14.719  16.038  33.149  1.00  0.00           O  
ATOM   3849  N   LYS C 240      15.819  14.073  32.999  1.00  0.00           N  
ATOM   3850  H   LYS C 240      15.933  13.213  32.459  1.00  0.00           H  
ATOM   3851  CA  LYS C 240      16.448  14.126  34.340  1.00  0.00           C  
ATOM   3852  HA  LYS C 240      16.258  15.109  34.774  1.00  0.00           H  
ATOM   3853  CB  LYS C 240      15.785  13.095  35.275  1.00  0.00           C  
ATOM   3854  HB2 LYS C 240      16.057  12.084  34.966  1.00  0.00           H  
ATOM   3855  HB3 LYS C 240      16.155  13.258  36.289  1.00  0.00           H  
ATOM   3856  CG  LYS C 240      14.253  13.252  35.262  1.00  0.00           C  
ATOM   3857  HG2 LYS C 240      14.007  14.314  35.239  1.00  0.00           H  
ATOM   3858  HG3 LYS C 240      13.848  12.785  34.363  1.00  0.00           H  
ATOM   3859  CD  LYS C 240      13.553  12.665  36.482  1.00  0.00           C  
ATOM   3860  HD2 LYS C 240      13.924  13.179  37.367  1.00  0.00           H  
ATOM   3861  HD3 LYS C 240      12.486  12.872  36.389  1.00  0.00           H  
ATOM   3862  CE  LYS C 240      13.757  11.157  36.640  1.00  0.00           C  
ATOM   3863  HE2 LYS C 240      13.461  10.650  35.715  1.00  0.00           H  
ATOM   3864  HE3 LYS C 240      14.817  10.955  36.816  1.00  0.00           H  
ATOM   3865  NZ  LYS C 240      12.943  10.683  37.780  1.00  0.00           N  
ATOM   3866  HZ1 LYS C 240      11.953  10.803  37.568  1.00  0.00           H  
ATOM   3867  HZ2 LYS C 240      13.116   9.704  37.997  1.00  0.00           H  
ATOM   3868  HZ3 LYS C 240      13.165  11.232  38.608  1.00  0.00           H  
ATOM   3869  C   LYS C 240      17.978  14.019  34.331  1.00  0.00           C  
ATOM   3870  O   LYS C 240      18.593  13.755  35.366  1.00  0.00           O  
ATOM   3871  N   CYS C 241      18.614  14.224  33.177  1.00  0.00           N  
ATOM   3872  H   CYS C 241      18.073  14.465  32.360  1.00  0.00           H  
ATOM   3873  CA  CYS C 241      20.071  14.209  33.076  1.00  0.00           C  
ATOM   3874  HA  CYS C 241      20.417  13.387  33.699  1.00  0.00           H  
ATOM   3875  CB  CYS C 241      20.495  13.871  31.641  1.00  0.00           C  
ATOM   3876  HB2 CYS C 241      21.581  13.765  31.601  1.00  0.00           H  
ATOM   3877  HB3 CYS C 241      20.041  12.920  31.364  1.00  0.00           H  
ATOM   3878  SG  CYS C 241      19.975  15.158  30.468  1.00  0.00           S  
ATOM   3879  HG  CYS C 241      20.340  14.526  29.350  1.00  0.00           H  
ATOM   3880  C   CYS C 241      20.739  15.487  33.621  1.00  0.00           C  
ATOM   3881  O   CYS C 241      20.220  16.592  33.478  1.00  0.00           O  
ATOM   3882  N   ILE C 242      21.933  15.316  34.195  1.00  0.00           N  
ATOM   3883  H   ILE C 242      22.262  14.362  34.285  1.00  0.00           H  
ATOM   3884  CA  ILE C 242      22.861  16.389  34.612  1.00  0.00           C  
ATOM   3885  HA  ILE C 242      22.443  17.347  34.307  1.00  0.00           H  
ATOM   3886  CB  ILE C 242      23.030  16.433  36.149  1.00  0.00           C  
ATOM   3887  HB  ILE C 242      23.750  17.219  36.384  1.00  0.00           H  
ATOM   3888  CG2 ILE C 242      21.698  16.831  36.805  1.00  0.00           C  
ATOM   3889 1HG2 ILE C 242      20.944  16.065  36.631  1.00  0.00           H  
ATOM   3890 2HG2 ILE C 242      21.834  16.969  37.876  1.00  0.00           H  
ATOM   3891 3HG2 ILE C 242      21.343  17.771  36.380  1.00  0.00           H  
ATOM   3892  CG1 ILE C 242      23.582  15.098  36.703  1.00  0.00           C  
ATOM   3893 2HG1 ILE C 242      22.835  14.318  36.569  1.00  0.00           H  
ATOM   3894 3HG1 ILE C 242      24.469  14.813  36.138  1.00  0.00           H  
ATOM   3895  CD1 ILE C 242      23.980  15.152  38.183  1.00  0.00           C  
ATOM   3896 1HD1 ILE C 242      23.102  15.303  38.811  1.00  0.00           H  
ATOM   3897 2HD1 ILE C 242      24.445  14.206  38.462  1.00  0.00           H  
ATOM   3898 3HD1 ILE C 242      24.694  15.959  38.347  1.00  0.00           H  
ATOM   3899  C   ILE C 242      24.226  16.289  33.911  1.00  0.00           C  
ATOM   3900  O   ILE C 242      25.105  17.115  34.140  1.00  0.00           O  
ATOM   3901  N   PHE C 243      24.412  15.266  33.073  1.00  0.00           N  
ATOM   3902  H   PHE C 243      23.660  14.602  32.962  1.00  0.00           H  
ATOM   3903  CA  PHE C 243      25.612  15.024  32.279  1.00  0.00           C  
ATOM   3904  HA  PHE C 243      26.115  15.973  32.104  1.00  0.00           H  
ATOM   3905  CB  PHE C 243      26.555  14.104  33.071  1.00  0.00           C  
ATOM   3906  HB2 PHE C 243      26.909  14.648  33.948  1.00  0.00           H  
ATOM   3907  HB3 PHE C 243      25.987  13.246  33.432  1.00  0.00           H  
ATOM   3908  CG  PHE C 243      27.759  13.601  32.294  1.00  0.00           C  
ATOM   3909  CD1 PHE C 243      28.822  14.471  31.993  1.00  0.00           C  
ATOM   3910  HD1 PHE C 243      28.788  15.498  32.321  1.00  0.00           H  
ATOM   3911  CE1 PHE C 243      29.918  14.019  31.236  1.00  0.00           C  
ATOM   3912  HE1 PHE C 243      30.708  14.707  30.972  1.00  0.00           H  
ATOM   3913  CZ  PHE C 243      29.975  12.681  30.811  1.00  0.00           C  
ATOM   3914  HZ  PHE C 243      30.826  12.330  30.246  1.00  0.00           H  
ATOM   3915  CE2 PHE C 243      28.915  11.808  31.108  1.00  0.00           C  
ATOM   3916  HE2 PHE C 243      28.943  10.783  30.765  1.00  0.00           H  
ATOM   3917  CD2 PHE C 243      27.804  12.271  31.834  1.00  0.00           C  
ATOM   3918  HD2 PHE C 243      26.984  11.598  32.033  1.00  0.00           H  
ATOM   3919  C   PHE C 243      25.234  14.419  30.918  1.00  0.00           C  
ATOM   3920  O   PHE C 243      24.269  13.651  30.821  1.00  0.00           O  
ATOM   3921  N   ALA C 244      25.998  14.745  29.873  1.00  0.00           N  
ATOM   3922  H   ALA C 244      26.777  15.380  30.030  1.00  0.00           H  
ATOM   3923  CA  ALA C 244      25.879  14.144  28.548  1.00  0.00           C  
ATOM   3924  HA  ALA C 244      25.511  13.128  28.675  1.00  0.00           H  
ATOM   3925  CB  ALA C 244      24.869  14.937  27.714  1.00  0.00           C  
ATOM   3926  HB1 ALA C 244      25.275  15.918  27.464  1.00  0.00           H  
ATOM   3927  HB2 ALA C 244      24.650  14.392  26.795  1.00  0.00           H  
ATOM   3928  HB3 ALA C 244      23.951  15.064  28.281  1.00  0.00           H  
ATOM   3929  C   ALA C 244      27.228  14.073  27.819  1.00  0.00           C  
ATOM   3930  O   ALA C 244      27.997  15.039  27.823  1.00  0.00           O  
ATOM   3931  N   CYS C 245      27.475  12.967  27.118  1.00  0.00           N  
ATOM   3932  H   CYS C 245      26.762  12.244  27.094  1.00  0.00           H  
ATOM   3933  CA  CYS C 245      28.690  12.732  26.335  1.00  0.00           C  
ATOM   3934  HA  CYS C 245      29.156  13.694  26.120  1.00  0.00           H  
ATOM   3935  CB  CYS C 245      29.688  11.916  27.174  1.00  0.00           C  
ATOM   3936  HB2 CYS C 245      30.604  11.760  26.602  1.00  0.00           H  
ATOM   3937  HB3 CYS C 245      29.931  12.480  28.074  1.00  0.00           H  
ATOM   3938  SG  CYS C 245      29.000  10.300  27.643  1.00  0.00           S  
ATOM   3939  HG  CYS C 245      30.101   9.818  28.232  1.00  0.00           H  
ATOM   3940  C   CYS C 245      28.394  12.081  24.974  1.00  0.00           C  
ATOM   3941  O   CYS C 245      27.327  11.510  24.752  1.00  0.00           O  
ATOM   3942  N   GLU C 246      29.351  12.175  24.051  1.00  0.00           N  
ATOM   3943  H   GLU C 246      30.229  12.597  24.303  1.00  0.00           H  
ATOM   3944  CA  GLU C 246      29.298  11.473  22.765  1.00  0.00           C  
ATOM   3945  HA  GLU C 246      28.259  11.359  22.451  1.00  0.00           H  
ATOM   3946  CB  GLU C 246      30.042  12.254  21.675  1.00  0.00           C  
ATOM   3947  HB2 GLU C 246      31.090  12.349  21.960  1.00  0.00           H  
ATOM   3948  HB3 GLU C 246      29.989  11.678  20.749  1.00  0.00           H  
ATOM   3949  CG  GLU C 246      29.465  13.650  21.407  1.00  0.00           C  
ATOM   3950  HG2 GLU C 246      28.389  13.560  21.239  1.00  0.00           H  
ATOM   3951  HG3 GLU C 246      29.625  14.287  22.279  1.00  0.00           H  
ATOM   3952  CD  GLU C 246      30.127  14.287  20.178  1.00  0.00           C  
ATOM   3953  OE1 GLU C 246      31.351  14.126  19.960  1.00  0.00           O  
ATOM   3954  OE2 GLU C 246      29.424  14.933  19.374  1.00  0.00           O  
ATOM   3955  C   GLU C 246      29.913  10.074  22.875  1.00  0.00           C  
ATOM   3956  O   GLU C 246      30.941   9.885  23.528  1.00  0.00           O  
ATOM   3957  N   GLU C 247      29.327   9.110  22.174  1.00  0.00           N  
ATOM   3958  H   GLU C 247      28.501   9.345  21.628  1.00  0.00           H  
ATOM   3959  CA  GLU C 247      29.863   7.764  22.009  1.00  0.00           C  
ATOM   3960  HA  GLU C 247      30.616   7.599  22.782  1.00  0.00           H  
ATOM   3961  CB  GLU C 247      28.739   6.738  22.214  1.00  0.00           C  
ATOM   3962  HB2 GLU C 247      27.999   7.119  22.919  1.00  0.00           H  
ATOM   3963  HB3 GLU C 247      28.241   6.568  21.259  1.00  0.00           H  
ATOM   3964  CG  GLU C 247      29.302   5.427  22.776  1.00  0.00           C  
ATOM   3965  HG2 GLU C 247      30.255   5.196  22.302  1.00  0.00           H  
ATOM   3966  HG3 GLU C 247      29.492   5.558  23.844  1.00  0.00           H  
ATOM   3967  CD  GLU C 247      28.347   4.261  22.545  1.00  0.00           C  
ATOM   3968  OE1 GLU C 247      28.095   3.909  21.371  1.00  0.00           O  
ATOM   3969  OE2 GLU C 247      27.854   3.674  23.531  1.00  0.00           O  
ATOM   3970  C   GLU C 247      30.546   7.599  20.637  1.00  0.00           C  
ATOM   3971  O   GLU C 247      30.215   8.281  19.665  1.00  0.00           O  
ATOM   3972  N   MET C 248      31.491   6.661  20.523  1.00  0.00           N  
ATOM   3973  H   MET C 248      31.688   6.078  21.324  1.00  0.00           H  
ATOM   3974  CA  MET C 248      32.280   6.448  19.300  1.00  0.00           C  
ATOM   3975  HA  MET C 248      32.653   7.424  18.986  1.00  0.00           H  
ATOM   3976  CB  MET C 248      33.497   5.583  19.662  1.00  0.00           C  
ATOM   3977  HB2 MET C 248      33.960   6.009  20.554  1.00  0.00           H  
ATOM   3978  HB3 MET C 248      33.178   4.566  19.896  1.00  0.00           H  
ATOM   3979  CG  MET C 248      34.552   5.552  18.548  1.00  0.00           C  
ATOM   3980  HG2 MET C 248      34.368   4.682  17.915  1.00  0.00           H  
ATOM   3981  HG3 MET C 248      34.435   6.442  17.930  1.00  0.00           H  
ATOM   3982  SD  MET C 248      36.276   5.526  19.123  1.00  0.00           S  
ATOM   3983  CE  MET C 248      36.312   3.957  20.037  1.00  0.00           C  
ATOM   3984  HE1 MET C 248      36.059   3.134  19.367  1.00  0.00           H  
ATOM   3985  HE2 MET C 248      37.313   3.797  20.439  1.00  0.00           H  
ATOM   3986  HE3 MET C 248      35.600   3.986  20.861  1.00  0.00           H  
ATOM   3987  C   MET C 248      31.462   5.896  18.111  1.00  0.00           C  
ATOM   3988  O   MET C 248      31.886   6.014  16.960  1.00  0.00           O  
ATOM   3989  N   SER C 249      30.255   5.385  18.374  1.00  0.00           N  
ATOM   3990  H   SER C 249      29.998   5.275  19.344  1.00  0.00           H  
ATOM   3991  CA  SER C 249      29.216   5.057  17.381  1.00  0.00           C  
ATOM   3992  HA  SER C 249      29.656   4.426  16.610  1.00  0.00           H  
ATOM   3993  CB  SER C 249      28.106   4.263  18.079  1.00  0.00           C  
ATOM   3994  HB2 SER C 249      27.336   3.993  17.354  1.00  0.00           H  
ATOM   3995  HB3 SER C 249      28.525   3.347  18.500  1.00  0.00           H  
ATOM   3996  OG  SER C 249      27.534   5.041  19.115  1.00  0.00           O  
ATOM   3997  HG  SER C 249      27.663   4.556  19.968  1.00  0.00           H  
ATOM   3998  C   SER C 249      28.594   6.280  16.683  1.00  0.00           C  
ATOM   3999  O   SER C 249      27.852   6.123  15.710  1.00  0.00           O  
ATOM   4000  N   GLY C 250      28.879   7.500  17.156  1.00  0.00           N  
ATOM   4001  H   GLY C 250      29.482   7.568  17.970  1.00  0.00           H  
ATOM   4002  CA  GLY C 250      28.264   8.742  16.679  1.00  0.00           C  
ATOM   4003  HA2 GLY C 250      28.965   9.560  16.841  1.00  0.00           H  
ATOM   4004  HA3 GLY C 250      28.062   8.668  15.610  1.00  0.00           H  
ATOM   4005  C   GLY C 250      26.954   9.111  17.387  1.00  0.00           C  
ATOM   4006  O   GLY C 250      26.292  10.060  16.971  1.00  0.00           O  
ATOM   4007  N   GLU C 251      26.579   8.387  18.446  1.00  0.00           N  
ATOM   4008  H   GLU C 251      27.181   7.633  18.747  1.00  0.00           H  
ATOM   4009  CA  GLU C 251      25.397   8.683  19.265  1.00  0.00           C  
ATOM   4010  HA  GLU C 251      24.715   9.298  18.678  1.00  0.00           H  
ATOM   4011  CB  GLU C 251      24.641   7.392  19.619  1.00  0.00           C  
ATOM   4012  HB2 GLU C 251      25.289   6.710  20.174  1.00  0.00           H  
ATOM   4013  HB3 GLU C 251      23.801   7.668  20.257  1.00  0.00           H  
ATOM   4014  CG  GLU C 251      24.110   6.699  18.351  1.00  0.00           C  
ATOM   4015  HG2 GLU C 251      23.823   7.467  17.630  1.00  0.00           H  
ATOM   4016  HG3 GLU C 251      24.917   6.109  17.910  1.00  0.00           H  
ATOM   4017  CD  GLU C 251      22.885   5.803  18.575  1.00  0.00           C  
ATOM   4018  OE1 GLU C 251      22.405   5.221  17.574  1.00  0.00           O  
ATOM   4019  OE2 GLU C 251      22.326   5.757  19.699  1.00  0.00           O  
ATOM   4020  C   GLU C 251      25.731   9.506  20.519  1.00  0.00           C  
ATOM   4021  O   GLU C 251      26.892   9.689  20.881  1.00  0.00           O  
ATOM   4022  N   VAL C 252      24.695  10.006  21.195  1.00  0.00           N  
ATOM   4023  H   VAL C 252      23.763   9.784  20.876  1.00  0.00           H  
ATOM   4024  CA  VAL C 252      24.807  10.773  22.444  1.00  0.00           C  
ATOM   4025  HA  VAL C 252      25.861  10.941  22.665  1.00  0.00           H  
ATOM   4026  CB  VAL C 252      24.147  12.160  22.313  1.00  0.00           C  
ATOM   4027  HB  VAL C 252      23.074  12.040  22.156  1.00  0.00           H  
ATOM   4028  CG1 VAL C 252      24.373  12.999  23.572  1.00  0.00           C  
ATOM   4029 1HG1 VAL C 252      25.440  13.059  23.776  1.00  0.00           H  
ATOM   4030 2HG1 VAL C 252      23.969  14.002  23.431  1.00  0.00           H  
ATOM   4031 3HG1 VAL C 252      23.875  12.550  24.431  1.00  0.00           H  
ATOM   4032  CG2 VAL C 252      24.733  12.951  21.134  1.00  0.00           C  
ATOM   4033 1HG2 VAL C 252      24.525  12.442  20.193  1.00  0.00           H  
ATOM   4034 2HG2 VAL C 252      24.275  13.938  21.093  1.00  0.00           H  
ATOM   4035 3HG2 VAL C 252      25.811  13.059  21.253  1.00  0.00           H  
ATOM   4036  C   VAL C 252      24.220   9.968  23.603  1.00  0.00           C  
ATOM   4037  O   VAL C 252      23.166   9.338  23.463  1.00  0.00           O  
ATOM   4038  N   ARG C 253      24.903   9.993  24.751  1.00  0.00           N  
ATOM   4039  H   ARG C 253      25.747  10.564  24.776  1.00  0.00           H  
ATOM   4040  CA  ARG C 253      24.512   9.340  26.009  1.00  0.00           C  
ATOM   4041  HA  ARG C 253      23.602   8.761  25.851  1.00  0.00           H  
ATOM   4042  CB  ARG C 253      25.634   8.393  26.478  1.00  0.00           C  
ATOM   4043  HB2 ARG C 253      26.528   8.989  26.666  1.00  0.00           H  
ATOM   4044  HB3 ARG C 253      25.342   7.937  27.426  1.00  0.00           H  
ATOM   4045  CG  ARG C 253      25.994   7.293  25.457  1.00  0.00           C  
ATOM   4046  HG2 ARG C 253      25.476   7.468  24.515  1.00  0.00           H  
ATOM   4047  HG3 ARG C 253      27.067   7.332  25.259  1.00  0.00           H  
ATOM   4048  CD  ARG C 253      25.642   5.885  25.953  1.00  0.00           C  
ATOM   4049  HD2 ARG C 253      26.321   5.608  26.761  1.00  0.00           H  
ATOM   4050  HD3 ARG C 253      24.631   5.899  26.353  1.00  0.00           H  
ATOM   4051  NE  ARG C 253      25.749   4.904  24.857  1.00  0.00           N  
ATOM   4052  HE  ARG C 253      26.669   4.514  24.649  1.00  0.00           H  
ATOM   4053  CZ  ARG C 253      24.819   4.599  23.973  1.00  0.00           C  
ATOM   4054  NH1 ARG C 253      23.570   4.927  24.110  1.00  0.00           N  
ATOM   4055 1HH1 ARG C 253      23.233   5.256  25.006  1.00  0.00           H  
ATOM   4056 2HH1 ARG C 253      22.914   4.655  23.387  1.00  0.00           H  
ATOM   4057  NH2 ARG C 253      25.137   3.919  22.915  1.00  0.00           N  
ATOM   4058 1HH2 ARG C 253      26.118   3.655  22.797  1.00  0.00           H  
ATOM   4059 2HH2 ARG C 253      24.450   3.755  22.202  1.00  0.00           H  
ATOM   4060  C   ARG C 253      24.217  10.407  27.062  1.00  0.00           C  
ATOM   4061  O   ARG C 253      24.896  11.432  27.106  1.00  0.00           O  
ATOM   4062  N   PHE C 254      23.228  10.156  27.915  1.00  0.00           N  
ATOM   4063  H   PHE C 254      22.752   9.269  27.853  1.00  0.00           H  
ATOM   4064  CA  PHE C 254      22.780  11.069  28.971  1.00  0.00           C  
ATOM   4065  HA  PHE C 254      23.481  11.899  29.064  1.00  0.00           H  
ATOM   4066  CB  PHE C 254      21.400  11.642  28.604  1.00  0.00           C  
ATOM   4067  HB2 PHE C 254      20.688  10.822  28.503  1.00  0.00           H  
ATOM   4068  HB3 PHE C 254      21.059  12.261  29.430  1.00  0.00           H  
ATOM   4069  CG  PHE C 254      21.366  12.482  27.338  1.00  0.00           C  
ATOM   4070  CD1 PHE C 254      21.080  11.891  26.093  1.00  0.00           C  
ATOM   4071  HD1 PHE C 254      20.874  10.831  26.031  1.00  0.00           H  
ATOM   4072  CE1 PHE C 254      21.071  12.671  24.923  1.00  0.00           C  
ATOM   4073  HE1 PHE C 254      20.856  12.206  23.970  1.00  0.00           H  
ATOM   4074  CZ  PHE C 254      21.339  14.049  24.991  1.00  0.00           C  
ATOM   4075  HZ  PHE C 254      21.331  14.648  24.090  1.00  0.00           H  
ATOM   4076  CE2 PHE C 254      21.605  14.647  26.237  1.00  0.00           C  
ATOM   4077  HE2 PHE C 254      21.802  15.707  26.296  1.00  0.00           H  
ATOM   4078  CD2 PHE C 254      21.619  13.865  27.405  1.00  0.00           C  
ATOM   4079  HD2 PHE C 254      21.848  14.325  28.354  1.00  0.00           H  
ATOM   4080  C   PHE C 254      22.731  10.337  30.321  1.00  0.00           C  
ATOM   4081  O   PHE C 254      22.272   9.196  30.379  1.00  0.00           O  
ATOM   4082  N   SER C 255      23.152  11.007  31.400  1.00  0.00           N  
ATOM   4083  H   SER C 255      23.518  11.945  31.270  1.00  0.00           H  
ATOM   4084  CA  SER C 255      23.198  10.447  32.761  1.00  0.00           C  
ATOM   4085  HA  SER C 255      22.652   9.502  32.791  1.00  0.00           H  
ATOM   4086  CB  SER C 255      24.637  10.177  33.207  1.00  0.00           C  
ATOM   4087  HB2 SER C 255      25.175  11.122  33.224  1.00  0.00           H  
ATOM   4088  HB3 SER C 255      24.624   9.774  34.222  1.00  0.00           H  
ATOM   4089  OG  SER C 255      25.327   9.269  32.374  1.00  0.00           O  
ATOM   4090  HG  SER C 255      26.208   9.171  32.758  1.00  0.00           H  
ATOM   4091  C   SER C 255      22.587  11.394  33.792  1.00  0.00           C  
ATOM   4092  O   SER C 255      22.775  12.611  33.721  1.00  0.00           O  
ATOM   4093  N   SER C 256      21.911  10.831  34.794  1.00  0.00           N  
ATOM   4094  H   SER C 256      21.765   9.827  34.777  1.00  0.00           H  
ATOM   4095  CA  SER C 256      21.305  11.558  35.929  1.00  0.00           C  
ATOM   4096  HA  SER C 256      21.089  12.580  35.622  1.00  0.00           H  
ATOM   4097  CB  SER C 256      19.970  10.917  36.354  1.00  0.00           C  
ATOM   4098  HB2 SER C 256      20.144  10.249  37.200  1.00  0.00           H  
ATOM   4099  HB3 SER C 256      19.284  11.697  36.678  1.00  0.00           H  
ATOM   4100  OG  SER C 256      19.372  10.158  35.318  1.00  0.00           O  
ATOM   4101  HG  SER C 256      19.843   9.304  35.299  1.00  0.00           H  
ATOM   4102  C   SER C 256      22.232  11.651  37.151  1.00  0.00           C  
ATOM   4103  O   SER C 256      21.877  12.290  38.141  1.00  0.00           O  
ATOM   4104  N   HIS C 257      23.401  11.005  37.082  1.00  0.00           N  
ATOM   4105  H   HIS C 257      23.607  10.513  36.227  1.00  0.00           H  
ATOM   4106  CA  HIS C 257      24.353  10.805  38.177  1.00  0.00           C  
ATOM   4107  HA  HIS C 257      23.952  11.271  39.074  1.00  0.00           H  
ATOM   4108  CB  HIS C 257      24.496   9.298  38.452  1.00  0.00           C  
ATOM   4109  HB2 HIS C 257      25.263   9.143  39.214  1.00  0.00           H  
ATOM   4110  HB3 HIS C 257      23.555   8.933  38.865  1.00  0.00           H  
ATOM   4111  CG  HIS C 257      24.837   8.456  37.241  1.00  0.00           C  
ATOM   4112  ND1 HIS C 257      23.904   7.847  36.393  1.00  0.00           N  
ATOM   4113  CE1 HIS C 257      24.620   7.188  35.468  1.00  0.00           C  
ATOM   4114  HE1 HIS C 257      24.199   6.601  34.660  1.00  0.00           H  
ATOM   4115  NE2 HIS C 257      25.934   7.357  35.681  1.00  0.00           N  
ATOM   4116  HE2 HIS C 257      26.673   6.952  35.103  1.00  0.00           H  
ATOM   4117  CD2 HIS C 257      26.092   8.156  36.795  1.00  0.00           C  
ATOM   4118  HD2 HIS C 257      27.025   8.485  37.238  1.00  0.00           H  
ATOM   4119  C   HIS C 257      25.718  11.454  37.917  1.00  0.00           C  
ATOM   4120  O   HIS C 257      26.110  11.675  36.765  1.00  0.00           O  
ATOM   4121  N   LEU C 258      26.465  11.727  38.989  1.00  0.00           N  
ATOM   4122  H   LEU C 258      26.088  11.470  39.903  1.00  0.00           H  
ATOM   4123  CA  LEU C 258      27.841  12.234  38.907  1.00  0.00           C  
ATOM   4124  HA  LEU C 258      27.823  13.104  38.255  1.00  0.00           H  
ATOM   4125  CB  LEU C 258      28.330  12.658  40.307  1.00  0.00           C  
ATOM   4126  HB2 LEU C 258      27.952  11.943  41.041  1.00  0.00           H  
ATOM   4127  HB3 LEU C 258      29.420  12.605  40.336  1.00  0.00           H  
ATOM   4128  CG  LEU C 258      27.910  14.082  40.717  1.00  0.00           C  
ATOM   4129  HG  LEU C 258      26.834  14.205  40.589  1.00  0.00           H  
ATOM   4130  CD1 LEU C 258      28.259  14.330  42.186  1.00  0.00           C  
ATOM   4131 1HD1 LEU C 258      29.334  14.248  42.338  1.00  0.00           H  
ATOM   4132 2HD1 LEU C 258      27.922  15.324  42.478  1.00  0.00           H  
ATOM   4133 3HD1 LEU C 258      27.746  13.598  42.809  1.00  0.00           H  
ATOM   4134  CD2 LEU C 258      28.649  15.131  39.877  1.00  0.00           C  
ATOM   4135 1HD2 LEU C 258      28.243  15.162  38.867  1.00  0.00           H  
ATOM   4136 2HD2 LEU C 258      28.532  16.116  40.321  1.00  0.00           H  
ATOM   4137 3HD2 LEU C 258      29.713  14.900  39.835  1.00  0.00           H  
ATOM   4138  C   LEU C 258      28.796  11.191  38.284  1.00  0.00           C  
ATOM   4139  O   LEU C 258      28.711  10.007  38.623  1.00  0.00           O  
ATOM   4140  N   PRO C 259      29.732  11.601  37.400  1.00  0.00           N  
ATOM   4141  CD  PRO C 259      29.948  12.951  36.894  1.00  0.00           C  
ATOM   4142  HD2 PRO C 259      29.991  13.681  37.703  1.00  0.00           H  
ATOM   4143  HD3 PRO C 259      29.148  13.205  36.198  1.00  0.00           H  
ATOM   4144  CG  PRO C 259      31.288  12.918  36.155  1.00  0.00           C  
ATOM   4145  HG2 PRO C 259      32.099  13.131  36.852  1.00  0.00           H  
ATOM   4146  HG3 PRO C 259      31.308  13.617  35.318  1.00  0.00           H  
ATOM   4147  CB  PRO C 259      31.384  11.469  35.683  1.00  0.00           C  
ATOM   4148  HB2 PRO C 259      32.419  11.162  35.522  1.00  0.00           H  
ATOM   4149  HB3 PRO C 259      30.806  11.347  34.766  1.00  0.00           H  
ATOM   4150  CA  PRO C 259      30.710  10.689  36.817  1.00  0.00           C  
ATOM   4151  HA  PRO C 259      30.188   9.831  36.390  1.00  0.00           H  
ATOM   4152  C   PRO C 259      31.708  10.171  37.865  1.00  0.00           C  
ATOM   4153  O   PRO C 259      31.975  10.806  38.889  1.00  0.00           O  
ATOM   4154  N   GLN C 260      32.263   8.990  37.594  1.00  0.00           N  
ATOM   4155  H   GLN C 260      32.049   8.558  36.707  1.00  0.00           H  
ATOM   4156  CA  GLN C 260      33.186   8.256  38.463  1.00  0.00           C  
ATOM   4157  HA  GLN C 260      33.444   8.878  39.319  1.00  0.00           H  
ATOM   4158  CB  GLN C 260      32.495   6.978  38.973  1.00  0.00           C  
ATOM   4159  HB2 GLN C 260      32.185   6.399  38.102  1.00  0.00           H  
ATOM   4160  HB3 GLN C 260      33.219   6.366  39.513  1.00  0.00           H  
ATOM   4161  CG  GLN C 260      31.248   7.213  39.852  1.00  0.00           C  
ATOM   4162  HG2 GLN C 260      30.742   8.134  39.565  1.00  0.00           H  
ATOM   4163  HG3 GLN C 260      30.548   6.399  39.660  1.00  0.00           H  
ATOM   4164  CD  GLN C 260      31.491   7.231  41.360  1.00  0.00           C  
ATOM   4165  OE1 GLN C 260      32.542   6.881  41.879  1.00  0.00           O  
ATOM   4166  NE2 GLN C 260      30.481   7.575  42.128  1.00  0.00           N  
ATOM   4167 1HE2 GLN C 260      30.559   7.370  43.115  1.00  0.00           H  
ATOM   4168 2HE2 GLN C 260      29.606   7.845  41.717  1.00  0.00           H  
ATOM   4169  C   GLN C 260      34.462   7.892  37.674  1.00  0.00           C  
ATOM   4170  O   GLN C 260      34.361   7.649  36.469  1.00  0.00           O  
ATOM   4171  N   PRO C 261      35.642   7.808  38.318  1.00  0.00           N  
ATOM   4172  CD  PRO C 261      36.881   7.415  37.658  1.00  0.00           C  
ATOM   4173  HD2 PRO C 261      37.028   7.975  36.734  1.00  0.00           H  
ATOM   4174  HD3 PRO C 261      36.854   6.346  37.446  1.00  0.00           H  
ATOM   4175  CG  PRO C 261      38.008   7.725  38.646  1.00  0.00           C  
ATOM   4176  HG2 PRO C 261      38.375   8.738  38.478  1.00  0.00           H  
ATOM   4177  HG3 PRO C 261      38.822   7.004  38.567  1.00  0.00           H  
ATOM   4178  CB  PRO C 261      37.305   7.646  40.002  1.00  0.00           C  
ATOM   4179  HB2 PRO C 261      37.831   8.222  40.765  1.00  0.00           H  
ATOM   4180  HB3 PRO C 261      37.219   6.602  40.307  1.00  0.00           H  
ATOM   4181  CA  PRO C 261      35.912   8.208  39.699  1.00  0.00           C  
ATOM   4182  HA  PRO C 261      35.189   7.758  40.381  1.00  0.00           H  
ATOM   4183  C   PRO C 261      35.880   9.739  39.856  1.00  0.00           C  
ATOM   4184  O   PRO C 261      36.105  10.477  38.895  1.00  0.00           O  
ATOM   4185  N   ASN C 262      35.624  10.219  41.073  1.00  0.00           N  
ATOM   4186  H   ASN C 262      35.455   9.573  41.832  1.00  0.00           H  
ATOM   4187  CA  ASN C 262      35.769  11.633  41.432  1.00  0.00           C  
ATOM   4188  HA  ASN C 262      36.482  12.087  40.742  1.00  0.00           H  
ATOM   4189  CB  ASN C 262      34.431  12.375  41.225  1.00  0.00           C  
ATOM   4190  HB2 ASN C 262      34.587  13.445  41.353  1.00  0.00           H  
ATOM   4191  HB3 ASN C 262      34.093  12.221  40.200  1.00  0.00           H  
ATOM   4192  CG  ASN C 262      33.335  11.954  42.183  1.00  0.00           C  
ATOM   4193  OD1 ASN C 262      33.413  12.202  43.373  1.00  0.00           O  
ATOM   4194  ND2 ASN C 262      32.287  11.326  41.700  1.00  0.00           N  
ATOM   4195 1HD2 ASN C 262      31.577  11.046  42.350  1.00  0.00           H  
ATOM   4196 2HD2 ASN C 262      32.203  11.159  40.699  1.00  0.00           H  
ATOM   4197  C   ASN C 262      36.393  11.797  42.834  1.00  0.00           C  
ATOM   4198  O   ASN C 262      36.614  10.821  43.560  1.00  0.00           O  
ATOM   4199  N   SER C 263      36.747  13.034  43.184  1.00  0.00           N  
ATOM   4200  H   SER C 263      36.529  13.801  42.562  1.00  0.00           H  
ATOM   4201  CA  SER C 263      37.528  13.372  44.382  1.00  0.00           C  
ATOM   4202  HA  SER C 263      38.269  12.588  44.545  1.00  0.00           H  
ATOM   4203  CB  SER C 263      38.282  14.680  44.118  1.00  0.00           C  
ATOM   4204  HB2 SER C 263      38.887  14.943  44.985  1.00  0.00           H  
ATOM   4205  HB3 SER C 263      38.944  14.544  43.260  1.00  0.00           H  
ATOM   4206  OG  SER C 263      37.365  15.720  43.838  1.00  0.00           O  
ATOM   4207  HG  SER C 263      37.871  16.535  43.637  1.00  0.00           H  
ATOM   4208  C   SER C 263      36.708  13.480  45.676  1.00  0.00           C  
ATOM   4209  O   SER C 263      37.299  13.606  46.755  1.00  0.00           O  
ATOM   4210  N   LEU C 264      35.377  13.414  45.604  1.00  0.00           N  
ATOM   4211  H   LEU C 264      34.954  13.190  44.712  1.00  0.00           H  
ATOM   4212  CA  LEU C 264      34.475  13.615  46.740  1.00  0.00           C  
ATOM   4213  HA  LEU C 264      34.926  14.330  47.430  1.00  0.00           H  
ATOM   4214  CB  LEU C 264      33.150  14.214  46.225  1.00  0.00           C  
ATOM   4215  HB2 LEU C 264      32.709  13.498  45.533  1.00  0.00           H  
ATOM   4216  HB3 LEU C 264      32.474  14.334  47.073  1.00  0.00           H  
ATOM   4217  CG  LEU C 264      33.253  15.563  45.489  1.00  0.00           C  
ATOM   4218  HG  LEU C 264      33.907  15.465  44.622  1.00  0.00           H  
ATOM   4219  CD1 LEU C 264      31.867  15.983  44.991  1.00  0.00           C  
ATOM   4220 1HD1 LEU C 264      31.177  16.081  45.827  1.00  0.00           H  
ATOM   4221 2HD1 LEU C 264      31.937  16.936  44.469  1.00  0.00           H  
ATOM   4222 3HD1 LEU C 264      31.488  15.233  44.295  1.00  0.00           H  
ATOM   4223  CD2 LEU C 264      33.793  16.669  46.396  1.00  0.00           C  
ATOM   4224 1HD2 LEU C 264      34.831  16.453  46.647  1.00  0.00           H  
ATOM   4225 2HD2 LEU C 264      33.755  17.624  45.877  1.00  0.00           H  
ATOM   4226 3HD2 LEU C 264      33.199  16.728  47.307  1.00  0.00           H  
ATOM   4227  C   LEU C 264      34.254  12.311  47.531  1.00  0.00           C  
ATOM   4228  O   LEU C 264      34.250  11.211  46.973  1.00  0.00           O  
ATOM   4229  N   CYS C 265      34.055  12.418  48.846  1.00  0.00           N  
ATOM   4230  H   CYS C 265      34.136  13.337  49.279  1.00  0.00           H  
ATOM   4231  CA  CYS C 265      33.703  11.277  49.694  1.00  0.00           C  
ATOM   4232  HA  CYS C 265      34.254  10.408  49.329  1.00  0.00           H  
ATOM   4233  CB  CYS C 265      34.176  11.516  51.136  1.00  0.00           C  
ATOM   4234  HB2 CYS C 265      34.050  10.599  51.714  1.00  0.00           H  
ATOM   4235  HB3 CYS C 265      35.235  11.774  51.136  1.00  0.00           H  
ATOM   4236  SG  CYS C 265      33.224  12.845  51.926  1.00  0.00           S  
ATOM   4237  HG  CYS C 265      33.825  13.861  51.271  1.00  0.00           H  
ATOM   4238  C   CYS C 265      32.208  10.918  49.612  1.00  0.00           C  
ATOM   4239  O   CYS C 265      31.351  11.758  49.322  1.00  0.00           O  
ATOM   4240  N   SER C 266      31.876   9.664  49.927  1.00  0.00           N  
ATOM   4241  H   SER C 266      32.610   9.025  50.198  1.00  0.00           H  
ATOM   4242  CA  SER C 266      30.518   9.095  49.855  1.00  0.00           C  
ATOM   4243  HA  SER C 266      30.166   9.188  48.827  1.00  0.00           H  
ATOM   4244  CB  SER C 266      30.582   7.591  50.176  1.00  0.00           C  
ATOM   4245  HB2 SER C 266      29.581   7.208  50.383  1.00  0.00           H  
ATOM   4246  HB3 SER C 266      30.978   7.068  49.304  1.00  0.00           H  
ATOM   4247  OG  SER C 266      31.443   7.342  51.279  1.00  0.00           O  
ATOM   4248  HG  SER C 266      31.707   6.403  51.279  1.00  0.00           H  
ATOM   4249  C   SER C 266      29.463   9.802  50.726  1.00  0.00           C  
ATOM   4250  O   SER C 266      28.276   9.689  50.431  1.00  0.00           O  
ATOM   4251  N   LEU C 267      29.865  10.585  51.737  1.00  0.00           N  
ATOM   4252  H   LEU C 267      30.854  10.633  51.930  1.00  0.00           H  
ATOM   4253  CA  LEU C 267      28.963  11.455  52.513  1.00  0.00           C  
ATOM   4254  HA  LEU C 267      28.047  10.911  52.737  1.00  0.00           H  
ATOM   4255  CB  LEU C 267      29.655  11.851  53.834  1.00  0.00           C  
ATOM   4256  HB2 LEU C 267      30.623  12.296  53.597  1.00  0.00           H  
ATOM   4257  HB3 LEU C 267      29.055  12.620  54.324  1.00  0.00           H  
ATOM   4258  CG  LEU C 267      29.868  10.700  54.835  1.00  0.00           C  
ATOM   4259  HG  LEU C 267      30.419   9.901  54.349  1.00  0.00           H  
ATOM   4260  CD1 LEU C 267      30.688  11.197  56.028  1.00  0.00           C  
ATOM   4261 1HD1 LEU C 267      30.157  11.997  56.544  1.00  0.00           H  
ATOM   4262 2HD1 LEU C 267      30.864  10.373  56.722  1.00  0.00           H  
ATOM   4263 3HD1 LEU C 267      31.653  11.566  55.682  1.00  0.00           H  
ATOM   4264  CD2 LEU C 267      28.548  10.138  55.368  1.00  0.00           C  
ATOM   4265 1HD2 LEU C 267      27.992   9.664  54.561  1.00  0.00           H  
ATOM   4266 2HD2 LEU C 267      28.752   9.387  56.130  1.00  0.00           H  
ATOM   4267 3HD2 LEU C 267      27.948  10.938  55.803  1.00  0.00           H  
ATOM   4268  C   LEU C 267      28.528  12.725  51.749  1.00  0.00           C  
ATOM   4269  O   LEU C 267      27.498  13.311  52.073  1.00  0.00           O  
ATOM   4270  N   ILE C 268      29.302  13.156  50.747  1.00  0.00           N  
ATOM   4271  H   ILE C 268      30.121  12.607  50.517  1.00  0.00           H  
ATOM   4272  CA  ILE C 268      29.118  14.427  50.027  1.00  0.00           C  
ATOM   4273  HA  ILE C 268      28.360  15.018  50.543  1.00  0.00           H  
ATOM   4274  CB  ILE C 268      30.442  15.235  50.077  1.00  0.00           C  
ATOM   4275  HB  ILE C 268      31.277  14.562  49.874  1.00  0.00           H  
ATOM   4276  CG2 ILE C 268      30.492  16.381  49.048  1.00  0.00           C  
ATOM   4277 1HG2 ILE C 268      29.667  17.075  49.216  1.00  0.00           H  
ATOM   4278 2HG2 ILE C 268      31.437  16.916  49.121  1.00  0.00           H  
ATOM   4279 3HG2 ILE C 268      30.426  15.982  48.038  1.00  0.00           H  
ATOM   4280  CG1 ILE C 268      30.591  15.813  51.502  1.00  0.00           C  
ATOM   4281 2HG1 ILE C 268      29.797  16.542  51.647  1.00  0.00           H  
ATOM   4282 3HG1 ILE C 268      30.456  15.018  52.237  1.00  0.00           H  
ATOM   4283  CD1 ILE C 268      31.928  16.493  51.812  1.00  0.00           C  
ATOM   4284 1HD1 ILE C 268      32.057  17.389  51.207  1.00  0.00           H  
ATOM   4285 2HD1 ILE C 268      31.950  16.782  52.863  1.00  0.00           H  
ATOM   4286 3HD1 ILE C 268      32.742  15.798  51.622  1.00  0.00           H  
ATOM   4287  C   ILE C 268      28.572  14.226  48.609  1.00  0.00           C  
ATOM   4288  O   ILE C 268      27.819  15.079  48.135  1.00  0.00           O  
ATOM   4289  N   VAL C 269      28.888  13.119  47.922  1.00  0.00           N  
ATOM   4290  H   VAL C 269      29.545  12.462  48.332  1.00  0.00           H  
ATOM   4291  CA  VAL C 269      28.513  12.979  46.497  1.00  0.00           C  
ATOM   4292  HA  VAL C 269      28.840  13.898  46.008  1.00  0.00           H  
ATOM   4293  CB  VAL C 269      29.236  11.832  45.745  1.00  0.00           C  
ATOM   4294  HB  VAL C 269      29.337  12.157  44.710  1.00  0.00           H  
ATOM   4295  CG1 VAL C 269      30.647  11.552  46.270  1.00  0.00           C  
ATOM   4296 1HG1 VAL C 269      30.611  10.838  47.090  1.00  0.00           H  
ATOM   4297 2HG1 VAL C 269      31.266  11.137  45.474  1.00  0.00           H  
ATOM   4298 3HG1 VAL C 269      31.105  12.469  46.625  1.00  0.00           H  
ATOM   4299  CG2 VAL C 269      28.492  10.490  45.727  1.00  0.00           C  
ATOM   4300 1HG2 VAL C 269      27.563  10.585  45.164  1.00  0.00           H  
ATOM   4301 2HG2 VAL C 269      29.107   9.739  45.230  1.00  0.00           H  
ATOM   4302 3HG2 VAL C 269      28.275  10.162  46.744  1.00  0.00           H  
ATOM   4303  C   VAL C 269      26.996  12.922  46.285  1.00  0.00           C  
ATOM   4304  O   VAL C 269      26.498  13.458  45.302  1.00  0.00           O  
ATOM   4305  N   GLU C 270      26.241  12.330  47.216  1.00  0.00           N  
ATOM   4306  H   GLU C 270      26.700  11.930  48.021  1.00  0.00           H  
ATOM   4307  CA  GLU C 270      24.783  12.215  47.100  1.00  0.00           C  
ATOM   4308  HA  GLU C 270      24.569  11.881  46.083  1.00  0.00           H  
ATOM   4309  CB  GLU C 270      24.254  11.123  48.044  1.00  0.00           C  
ATOM   4310  HB2 GLU C 270      24.749  10.180  47.799  1.00  0.00           H  
ATOM   4311  HB3 GLU C 270      24.481  11.373  49.081  1.00  0.00           H  
ATOM   4312  CG  GLU C 270      22.741  10.953  47.875  1.00  0.00           C  
ATOM   4313  HG2 GLU C 270      22.231  11.850  48.233  1.00  0.00           H  
ATOM   4314  HG3 GLU C 270      22.516  10.838  46.811  1.00  0.00           H  
ATOM   4315  CD  GLU C 270      22.212   9.738  48.634  1.00  0.00           C  
ATOM   4316  OE1 GLU C 270      22.100   8.657  48.017  1.00  0.00           O  
ATOM   4317  OE2 GLU C 270      21.798   9.874  49.809  1.00  0.00           O  
ATOM   4318  C   GLU C 270      24.039  13.559  47.257  1.00  0.00           C  
ATOM   4319  O   GLU C 270      23.223  13.877  46.386  1.00  0.00           O  
ATOM   4320  N   PRO C 271      24.290  14.392  48.291  1.00  0.00           N  
ATOM   4321  CD  PRO C 271      25.012  14.119  49.529  1.00  0.00           C  
ATOM   4322  HD2 PRO C 271      25.981  13.655  49.362  1.00  0.00           H  
ATOM   4323  HD3 PRO C 271      24.403  13.476  50.165  1.00  0.00           H  
ATOM   4324  CG  PRO C 271      25.195  15.475  50.211  1.00  0.00           C  
ATOM   4325  HG2 PRO C 271      26.102  15.959  49.851  1.00  0.00           H  
ATOM   4326  HG3 PRO C 271      25.221  15.377  51.298  1.00  0.00           H  
ATOM   4327  CB  PRO C 271      23.974  16.264  49.740  1.00  0.00           C  
ATOM   4328  HB2 PRO C 271      24.153  17.338  49.744  1.00  0.00           H  
ATOM   4329  HB3 PRO C 271      23.125  16.026  50.382  1.00  0.00           H  
ATOM   4330  CA  PRO C 271      23.703  15.728  48.331  1.00  0.00           C  
ATOM   4331  HA  PRO C 271      22.623  15.649  48.203  1.00  0.00           H  
ATOM   4332  C   PRO C 271      24.232  16.635  47.206  1.00  0.00           C  
ATOM   4333  O   PRO C 271      23.463  17.453  46.705  1.00  0.00           O  
ATOM   4334  N   MET C 272      25.476  16.459  46.736  1.00  0.00           N  
ATOM   4335  H   MET C 272      26.081  15.786  47.195  1.00  0.00           H  
ATOM   4336  CA  MET C 272      26.010  17.178  45.565  1.00  0.00           C  
ATOM   4337  HA  MET C 272      25.892  18.249  45.736  1.00  0.00           H  
ATOM   4338  CB  MET C 272      27.509  16.871  45.419  1.00  0.00           C  
ATOM   4339  HB2 MET C 272      27.994  16.974  46.388  1.00  0.00           H  
ATOM   4340  HB3 MET C 272      27.633  15.840  45.091  1.00  0.00           H  
ATOM   4341  CG  MET C 272      28.223  17.790  44.419  1.00  0.00           C  
ATOM   4342  HG2 MET C 272      29.193  17.350  44.186  1.00  0.00           H  
ATOM   4343  HG3 MET C 272      27.650  17.824  43.492  1.00  0.00           H  
ATOM   4344  SD  MET C 272      28.505  19.490  44.990  1.00  0.00           S  
ATOM   4345  CE  MET C 272      29.775  19.195  46.253  1.00  0.00           C  
ATOM   4346  HE1 MET C 272      30.614  18.659  45.810  1.00  0.00           H  
ATOM   4347  HE2 MET C 272      30.130  20.146  46.645  1.00  0.00           H  
ATOM   4348  HE3 MET C 272      29.358  18.611  47.072  1.00  0.00           H  
ATOM   4349  C   MET C 272      25.257  16.826  44.267  1.00  0.00           C  
ATOM   4350  O   MET C 272      24.917  17.711  43.486  1.00  0.00           O  
ATOM   4351  N   GLU C 273      24.944  15.548  44.047  1.00  0.00           N  
ATOM   4352  H   GLU C 273      25.305  14.847  44.687  1.00  0.00           H  
ATOM   4353  CA  GLU C 273      24.158  15.073  42.901  1.00  0.00           C  
ATOM   4354  HA  GLU C 273      24.631  15.412  41.978  1.00  0.00           H  
ATOM   4355  CB  GLU C 273      24.185  13.536  42.921  1.00  0.00           C  
ATOM   4356  HB2 GLU C 273      25.230  13.223  42.910  1.00  0.00           H  
ATOM   4357  HB3 GLU C 273      23.736  13.176  43.847  1.00  0.00           H  
ATOM   4358  CG  GLU C 273      23.480  12.859  41.742  1.00  0.00           C  
ATOM   4359  HG2 GLU C 273      22.406  13.041  41.804  1.00  0.00           H  
ATOM   4360  HG3 GLU C 273      23.852  13.288  40.808  1.00  0.00           H  
ATOM   4361  CD  GLU C 273      23.771  11.353  41.773  1.00  0.00           C  
ATOM   4362  OE1 GLU C 273      24.858  10.967  41.287  1.00  0.00           O  
ATOM   4363  OE2 GLU C 273      22.936  10.581  42.309  1.00  0.00           O  
ATOM   4364  C   GLU C 273      22.729  15.643  42.920  1.00  0.00           C  
ATOM   4365  O   GLU C 273      22.265  16.190  41.919  1.00  0.00           O  
ATOM   4366  N   ASN C 274      22.064  15.624  44.081  1.00  0.00           N  
ATOM   4367  H   ASN C 274      22.510  15.181  44.876  1.00  0.00           H  
ATOM   4368  CA  ASN C 274      20.740  16.235  44.254  1.00  0.00           C  
ATOM   4369  HA  ASN C 274      20.090  15.892  43.447  1.00  0.00           H  
ATOM   4370  CB  ASN C 274      20.138  15.756  45.586  1.00  0.00           C  
ATOM   4371  HB2 ASN C 274      20.860  15.891  46.391  1.00  0.00           H  
ATOM   4372  HB3 ASN C 274      19.264  16.365  45.815  1.00  0.00           H  
ATOM   4373  CG  ASN C 274      19.672  14.308  45.538  1.00  0.00           C  
ATOM   4374  OD1 ASN C 274      18.607  13.999  45.023  1.00  0.00           O  
ATOM   4375  ND2 ASN C 274      20.419  13.381  46.089  1.00  0.00           N  
ATOM   4376 1HD2 ASN C 274      20.031  12.450  46.160  1.00  0.00           H  
ATOM   4377 2HD2 ASN C 274      21.362  13.591  46.392  1.00  0.00           H  
ATOM   4378  C   ASN C 274      20.776  17.779  44.155  1.00  0.00           C  
ATOM   4379  O   ASN C 274      19.785  18.385  43.753  1.00  0.00           O  
ATOM   4380  N   TRP C 275      21.902  18.429  44.465  1.00  0.00           N  
ATOM   4381  H   TRP C 275      22.664  17.902  44.877  1.00  0.00           H  
ATOM   4382  CA  TRP C 275      22.097  19.869  44.255  1.00  0.00           C  
ATOM   4383  HA  TRP C 275      21.213  20.401  44.597  1.00  0.00           H  
ATOM   4384  CB  TRP C 275      23.290  20.329  45.099  1.00  0.00           C  
ATOM   4385  HB2 TRP C 275      23.096  20.052  46.134  1.00  0.00           H  
ATOM   4386  HB3 TRP C 275      24.186  19.798  44.780  1.00  0.00           H  
ATOM   4387  CG  TRP C 275      23.589  21.793  45.075  1.00  0.00           C  
ATOM   4388  CD1 TRP C 275      22.904  22.730  45.761  1.00  0.00           C  
ATOM   4389  HD1 TRP C 275      22.053  22.535  46.396  1.00  0.00           H  
ATOM   4390  NE1 TRP C 275      23.462  23.969  45.538  1.00  0.00           N  
ATOM   4391  HE1 TRP C 275      23.066  24.817  45.933  1.00  0.00           H  
ATOM   4392  CE2 TRP C 275      24.563  23.894  44.716  1.00  0.00           C  
ATOM   4393  CZ2 TRP C 275      25.469  24.852  44.237  1.00  0.00           C  
ATOM   4394  HZ2 TRP C 275      25.385  25.882  44.547  1.00  0.00           H  
ATOM   4395  CH2 TRP C 275      26.474  24.451  43.340  1.00  0.00           C  
ATOM   4396  HH2 TRP C 275      27.172  25.180  42.949  1.00  0.00           H  
ATOM   4397  CZ3 TRP C 275      26.576  23.099  42.963  1.00  0.00           C  
ATOM   4398  HZ3 TRP C 275      27.351  22.790  42.278  1.00  0.00           H  
ATOM   4399  CE3 TRP C 275      25.685  22.140  43.486  1.00  0.00           C  
ATOM   4400  HE3 TRP C 275      25.795  21.100  43.217  1.00  0.00           H  
ATOM   4401  CD2 TRP C 275      24.652  22.512  44.371  1.00  0.00           C  
ATOM   4402  C   TRP C 275      22.260  20.219  42.770  1.00  0.00           C  
ATOM   4403  O   TRP C 275      21.613  21.144  42.276  1.00  0.00           O  
ATOM   4404  N   LEU C 276      23.038  19.433  42.023  1.00  0.00           N  
ATOM   4405  H   LEU C 276      23.552  18.686  42.485  1.00  0.00           H  
ATOM   4406  CA  LEU C 276      23.198  19.602  40.575  1.00  0.00           C  
ATOM   4407  HA  LEU C 276      23.432  20.647  40.378  1.00  0.00           H  
ATOM   4408  CB  LEU C 276      24.376  18.741  40.092  1.00  0.00           C  
ATOM   4409  HB2 LEU C 276      24.228  17.721  40.452  1.00  0.00           H  
ATOM   4410  HB3 LEU C 276      24.376  18.711  39.001  1.00  0.00           H  
ATOM   4411  CG  LEU C 276      25.746  19.260  40.574  1.00  0.00           C  
ATOM   4412  HG  LEU C 276      25.717  19.447  41.645  1.00  0.00           H  
ATOM   4413  CD1 LEU C 276      26.812  18.202  40.316  1.00  0.00           C  
ATOM   4414 1HD1 LEU C 276      26.854  17.959  39.255  1.00  0.00           H  
ATOM   4415 2HD1 LEU C 276      27.784  18.568  40.648  1.00  0.00           H  
ATOM   4416 3HD1 LEU C 276      26.563  17.306  40.884  1.00  0.00           H  
ATOM   4417  CD2 LEU C 276      26.171  20.553  39.868  1.00  0.00           C  
ATOM   4418 1HD2 LEU C 276      25.485  21.361  40.117  1.00  0.00           H  
ATOM   4419 2HD2 LEU C 276      27.168  20.843  40.200  1.00  0.00           H  
ATOM   4420 3HD2 LEU C 276      26.186  20.406  38.789  1.00  0.00           H  
ATOM   4421  C   LEU C 276      21.897  19.314  39.805  1.00  0.00           C  
ATOM   4422  O   LEU C 276      21.618  20.014  38.834  1.00  0.00           O  
ATOM   4423  N   GLN C 277      21.052  18.394  40.283  1.00  0.00           N  
ATOM   4424  H   GLN C 277      21.377  17.805  41.043  1.00  0.00           H  
ATOM   4425  CA  GLN C 277      19.683  18.166  39.773  1.00  0.00           C  
ATOM   4426  HA  GLN C 277      19.735  17.943  38.707  1.00  0.00           H  
ATOM   4427  CB  GLN C 277      19.091  16.943  40.499  1.00  0.00           C  
ATOM   4428  HB2 GLN C 277      19.300  17.033  41.564  1.00  0.00           H  
ATOM   4429  HB3 GLN C 277      18.005  16.939  40.390  1.00  0.00           H  
ATOM   4430  CG  GLN C 277      19.651  15.597  39.994  1.00  0.00           C  
ATOM   4431  HG2 GLN C 277      20.733  15.662  39.885  1.00  0.00           H  
ATOM   4432  HG3 GLN C 277      19.440  14.831  40.740  1.00  0.00           H  
ATOM   4433  CD  GLN C 277      19.048  15.136  38.667  1.00  0.00           C  
ATOM   4434  OE1 GLN C 277      18.051  15.650  38.186  1.00  0.00           O  
ATOM   4435  NE2 GLN C 277      19.606  14.135  38.026  1.00  0.00           N  
ATOM   4436 1HE2 GLN C 277      19.201  13.927  37.117  1.00  0.00           H  
ATOM   4437 2HE2 GLN C 277      20.441  13.671  38.365  1.00  0.00           H  
ATOM   4438  C   GLN C 277      18.748  19.393  39.909  1.00  0.00           C  
ATOM   4439  O   GLN C 277      17.725  19.469  39.222  1.00  0.00           O  
ATOM   4440  N   LEU C 278      19.095  20.378  40.752  1.00  0.00           N  
ATOM   4441  H   LEU C 278      19.925  20.244  41.316  1.00  0.00           H  
ATOM   4442  CA  LEU C 278      18.444  21.695  40.792  1.00  0.00           C  
ATOM   4443  HA  LEU C 278      17.447  21.620  40.356  1.00  0.00           H  
ATOM   4444  CB  LEU C 278      18.288  22.178  42.248  1.00  0.00           C  
ATOM   4445  HB2 LEU C 278      19.279  22.277  42.691  1.00  0.00           H  
ATOM   4446  HB3 LEU C 278      17.834  23.169  42.227  1.00  0.00           H  
ATOM   4447  CG  LEU C 278      17.436  21.273  43.160  1.00  0.00           C  
ATOM   4448  HG  LEU C 278      17.879  20.281  43.211  1.00  0.00           H  
ATOM   4449  CD1 LEU C 278      17.409  21.863  44.573  1.00  0.00           C  
ATOM   4450 1HD1 LEU C 278      16.943  22.847  44.559  1.00  0.00           H  
ATOM   4451 2HD1 LEU C 278      16.857  21.196  45.234  1.00  0.00           H  
ATOM   4452 3HD1 LEU C 278      18.430  21.946  44.947  1.00  0.00           H  
ATOM   4453  CD2 LEU C 278      15.989  21.144  42.678  1.00  0.00           C  
ATOM   4454 1HD2 LEU C 278      15.968  20.625  41.719  1.00  0.00           H  
ATOM   4455 2HD2 LEU C 278      15.413  20.559  43.393  1.00  0.00           H  
ATOM   4456 3HD2 LEU C 278      15.541  22.131  42.555  1.00  0.00           H  
ATOM   4457  C   LEU C 278      19.202  22.729  39.944  1.00  0.00           C  
ATOM   4458  O   LEU C 278      18.591  23.407  39.124  1.00  0.00           O  
ATOM   4459  N   MET C 279      20.525  22.846  40.104  1.00  0.00           N  
ATOM   4460  H   MET C 279      20.972  22.245  40.788  1.00  0.00           H  
ATOM   4461  CA  MET C 279      21.334  23.890  39.447  1.00  0.00           C  
ATOM   4462  HA  MET C 279      20.885  24.863  39.652  1.00  0.00           H  
ATOM   4463  CB  MET C 279      22.761  23.879  40.024  1.00  0.00           C  
ATOM   4464  HB2 MET C 279      23.190  22.887  39.887  1.00  0.00           H  
ATOM   4465  HB3 MET C 279      23.373  24.588  39.468  1.00  0.00           H  
ATOM   4466  CG  MET C 279      22.821  24.243  41.514  1.00  0.00           C  
ATOM   4467  HG2 MET C 279      22.132  23.605  42.065  1.00  0.00           H  
ATOM   4468  HG3 MET C 279      23.826  24.031  41.881  1.00  0.00           H  
ATOM   4469  SD  MET C 279      22.422  25.969  41.902  1.00  0.00           S  
ATOM   4470  CE  MET C 279      24.025  26.749  41.590  1.00  0.00           C  
ATOM   4471  HE1 MET C 279      24.428  26.404  40.641  1.00  0.00           H  
ATOM   4472  HE2 MET C 279      23.903  27.830  41.570  1.00  0.00           H  
ATOM   4473  HE3 MET C 279      24.721  26.484  42.379  1.00  0.00           H  
ATOM   4474  C   MET C 279      21.393  23.743  37.916  1.00  0.00           C  
ATOM   4475  O   MET C 279      21.318  24.738  37.196  1.00  0.00           O  
ATOM   4476  N   LEU C 280      21.489  22.505  37.421  1.00  0.00           N  
ATOM   4477  H   LEU C 280      21.506  21.732  38.078  1.00  0.00           H  
ATOM   4478  CA  LEU C 280      21.535  22.148  35.996  1.00  0.00           C  
ATOM   4479  HA  LEU C 280      21.776  23.040  35.417  1.00  0.00           H  
ATOM   4480  CB  LEU C 280      22.654  21.112  35.758  1.00  0.00           C  
ATOM   4481  HB2 LEU C 280      22.426  20.215  36.334  1.00  0.00           H  
ATOM   4482  HB3 LEU C 280      22.651  20.828  34.705  1.00  0.00           H  
ATOM   4483  CG  LEU C 280      24.072  21.594  36.120  1.00  0.00           C  
ATOM   4484  HG  LEU C 280      24.103  21.897  37.168  1.00  0.00           H  
ATOM   4485  CD1 LEU C 280      25.070  20.452  35.932  1.00  0.00           C  
ATOM   4486 1HD1 LEU C 280      25.063  20.115  34.894  1.00  0.00           H  
ATOM   4487 2HD1 LEU C 280      26.072  20.785  36.202  1.00  0.00           H  
ATOM   4488 3HD1 LEU C 280      24.794  19.614  36.571  1.00  0.00           H  
ATOM   4489  CD2 LEU C 280      24.518  22.775  35.253  1.00  0.00           C  
ATOM   4490 1HD2 LEU C 280      23.912  23.654  35.473  1.00  0.00           H  
ATOM   4491 2HD2 LEU C 280      25.559  23.016  35.457  1.00  0.00           H  
ATOM   4492 3HD2 LEU C 280      24.414  22.527  34.197  1.00  0.00           H  
ATOM   4493  C   LEU C 280      20.164  21.688  35.468  1.00  0.00           C  
ATOM   4494  O   LEU C 280      20.078  20.988  34.459  1.00  0.00           O  
ATOM   4495  N   ASN C 281      19.073  22.070  36.140  1.00  0.00           N  
ATOM   4496  H   ASN C 281      19.181  22.644  36.963  1.00  0.00           H  
ATOM   4497  CA  ASN C 281      17.727  21.715  35.704  1.00  0.00           C  
ATOM   4498  HA  ASN C 281      17.738  20.650  35.455  1.00  0.00           H  
ATOM   4499  CB  ASN C 281      16.740  21.919  36.859  1.00  0.00           C  
ATOM   4500  HB2 ASN C 281      17.212  21.631  37.796  1.00  0.00           H  
ATOM   4501  HB3 ASN C 281      16.445  22.965  36.930  1.00  0.00           H  
ATOM   4502  CG  ASN C 281      15.507  21.062  36.665  1.00  0.00           C  
ATOM   4503  OD1 ASN C 281      14.718  21.276  35.756  1.00  0.00           O  
ATOM   4504  ND2 ASN C 281      15.343  20.040  37.472  1.00  0.00           N  
ATOM   4505 1HD2 ASN C 281      14.536  19.461  37.336  1.00  0.00           H  
ATOM   4506 2HD2 ASN C 281      16.072  19.806  38.143  1.00  0.00           H  
ATOM   4507  C   ASN C 281      17.330  22.493  34.436  1.00  0.00           C  
ATOM   4508  O   ASN C 281      17.584  23.698  34.310  1.00  0.00           O  
ATOM   4509  N   TRP C 282      16.687  21.812  33.484  1.00  0.00           N  
ATOM   4510  H   TRP C 282      16.472  20.839  33.649  1.00  0.00           H  
ATOM   4511  CA  TRP C 282      16.310  22.411  32.201  1.00  0.00           C  
ATOM   4512  HA  TRP C 282      17.159  22.997  31.846  1.00  0.00           H  
ATOM   4513  CB  TRP C 282      16.061  21.306  31.164  1.00  0.00           C  
ATOM   4514  HB2 TRP C 282      16.710  20.457  31.384  1.00  0.00           H  
ATOM   4515  HB3 TRP C 282      15.029  20.959  31.242  1.00  0.00           H  
ATOM   4516  CG  TRP C 282      16.343  21.722  29.753  1.00  0.00           C  
ATOM   4517  CD1 TRP C 282      15.529  22.462  28.969  1.00  0.00           C  
ATOM   4518  HD1 TRP C 282      14.564  22.857  29.271  1.00  0.00           H  
ATOM   4519  NE1 TRP C 282      16.146  22.716  27.760  1.00  0.00           N  
ATOM   4520  HE1 TRP C 282      15.763  23.353  27.072  1.00  0.00           H  
ATOM   4521  CE2 TRP C 282      17.393  22.136  27.696  1.00  0.00           C  
ATOM   4522  CZ2 TRP C 282      18.378  22.094  26.700  1.00  0.00           C  
ATOM   4523  HZ2 TRP C 282      18.217  22.584  25.751  1.00  0.00           H  
ATOM   4524  CH2 TRP C 282      19.590  21.440  26.970  1.00  0.00           C  
ATOM   4525  HH2 TRP C 282      20.370  21.432  26.224  1.00  0.00           H  
ATOM   4526  CZ3 TRP C 282      19.793  20.815  28.214  1.00  0.00           C  
ATOM   4527  HZ3 TRP C 282      20.734  20.320  28.421  1.00  0.00           H  
ATOM   4528  CE3 TRP C 282      18.786  20.843  29.198  1.00  0.00           C  
ATOM   4529  HE3 TRP C 282      18.958  20.364  30.153  1.00  0.00           H  
ATOM   4530  CD2 TRP C 282      17.559  21.504  28.967  1.00  0.00           C  
ATOM   4531  C   TRP C 282      15.120  23.381  32.316  1.00  0.00           C  
ATOM   4532  O   TRP C 282      15.003  24.287  31.491  1.00  0.00           O  
ATOM   4533  N   ASP C 283      14.266  23.239  33.336  1.00  0.00           N  
ATOM   4534  H   ASP C 283      14.442  22.517  34.030  1.00  0.00           H  
ATOM   4535  CA  ASP C 283      13.110  24.117  33.562  1.00  0.00           C  
ATOM   4536  HA  ASP C 283      12.869  24.602  32.620  1.00  0.00           H  
ATOM   4537  CB  ASP C 283      11.879  23.267  33.925  1.00  0.00           C  
ATOM   4538  HB2 ASP C 283      11.778  22.474  33.181  1.00  0.00           H  
ATOM   4539  HB3 ASP C 283      12.042  22.794  34.895  1.00  0.00           H  
ATOM   4540  CG  ASP C 283      10.566  24.065  33.974  1.00  0.00           C  
ATOM   4541  OD1 ASP C 283       9.521  23.481  33.605  1.00  0.00           O  
ATOM   4542  OD2 ASP C 283      10.584  25.250  34.379  1.00  0.00           O  
ATOM   4543  C   ASP C 283      13.433  25.191  34.628  1.00  0.00           C  
ATOM   4544  O   ASP C 283      13.715  24.843  35.783  1.00  0.00           O  
ATOM   4545  N   PRO C 284      13.370  26.502  34.304  1.00  0.00           N  
ATOM   4546  CD  PRO C 284      13.004  27.070  33.013  1.00  0.00           C  
ATOM   4547  HD2 PRO C 284      12.144  26.563  32.574  1.00  0.00           H  
ATOM   4548  HD3 PRO C 284      13.859  27.020  32.337  1.00  0.00           H  
ATOM   4549  CG  PRO C 284      12.642  28.525  33.291  1.00  0.00           C  
ATOM   4550  HG2 PRO C 284      11.595  28.589  33.589  1.00  0.00           H  
ATOM   4551  HG3 PRO C 284      12.838  29.161  32.427  1.00  0.00           H  
ATOM   4552  CB  PRO C 284      13.539  28.879  34.475  1.00  0.00           C  
ATOM   4553  HB2 PRO C 284      13.116  29.689  35.070  1.00  0.00           H  
ATOM   4554  HB3 PRO C 284      14.525  29.162  34.105  1.00  0.00           H  
ATOM   4555  CA  PRO C 284      13.650  27.570  35.266  1.00  0.00           C  
ATOM   4556  HA  PRO C 284      14.674  27.468  35.619  1.00  0.00           H  
ATOM   4557  C   PRO C 284      12.723  27.559  36.496  1.00  0.00           C  
ATOM   4558  O   PRO C 284      13.129  28.037  37.555  1.00  0.00           O  
ATOM   4559  N   GLN C 285      11.518  26.980  36.409  1.00  0.00           N  
ATOM   4560  H   GLN C 285      11.254  26.520  35.536  1.00  0.00           H  
ATOM   4561  CA  GLN C 285      10.580  26.867  37.538  1.00  0.00           C  
ATOM   4562  HA  GLN C 285      10.667  27.774  38.137  1.00  0.00           H  
ATOM   4563  CB  GLN C 285       9.132  26.790  37.032  1.00  0.00           C  
ATOM   4564  HB2 GLN C 285       8.983  25.865  36.471  1.00  0.00           H  
ATOM   4565  HB3 GLN C 285       8.467  26.773  37.897  1.00  0.00           H  
ATOM   4566  CG  GLN C 285       8.759  27.993  36.153  1.00  0.00           C  
ATOM   4567  HG2 GLN C 285       9.145  28.907  36.606  1.00  0.00           H  
ATOM   4568  HG3 GLN C 285       9.207  27.874  35.167  1.00  0.00           H  
ATOM   4569  CD  GLN C 285       7.252  28.136  36.004  1.00  0.00           C  
ATOM   4570  OE1 GLN C 285       6.631  29.010  36.594  1.00  0.00           O  
ATOM   4571  NE2 GLN C 285       6.612  27.290  35.227  1.00  0.00           N  
ATOM   4572 1HE2 GLN C 285       5.625  27.438  35.111  1.00  0.00           H  
ATOM   4573 2HE2 GLN C 285       7.114  26.560  34.748  1.00  0.00           H  
ATOM   4574  C   GLN C 285      10.888  25.697  38.490  1.00  0.00           C  
ATOM   4575  O   GLN C 285      10.278  25.614  39.560  1.00  0.00           O  
ATOM   4576  N   GLN C 286      11.832  24.819  38.127  1.00  0.00           N  
ATOM   4577  H   GLN C 286      12.219  24.901  37.192  1.00  0.00           H  
ATOM   4578  CA  GLN C 286      12.466  23.855  39.040  1.00  0.00           C  
ATOM   4579  HA  GLN C 286      11.898  23.810  39.969  1.00  0.00           H  
ATOM   4580  CB  GLN C 286      12.460  22.451  38.419  1.00  0.00           C  
ATOM   4581  HB2 GLN C 286      13.028  22.460  37.488  1.00  0.00           H  
ATOM   4582  HB3 GLN C 286      12.965  21.785  39.120  1.00  0.00           H  
ATOM   4583  CG  GLN C 286      11.043  21.917  38.136  1.00  0.00           C  
ATOM   4584  HG2 GLN C 286      10.379  22.192  38.956  1.00  0.00           H  
ATOM   4585  HG3 GLN C 286      10.665  22.379  37.223  1.00  0.00           H  
ATOM   4586  CD  GLN C 286      10.994  20.396  37.993  1.00  0.00           C  
ATOM   4587  OE1 GLN C 286      11.722  19.647  38.630  1.00  0.00           O  
ATOM   4588  NE2 GLN C 286      10.083  19.849  37.223  1.00  0.00           N  
ATOM   4589 1HE2 GLN C 286      10.089  18.850  37.153  1.00  0.00           H  
ATOM   4590 2HE2 GLN C 286       9.419  20.418  36.705  1.00  0.00           H  
ATOM   4591  C   GLN C 286      13.898  24.267  39.432  1.00  0.00           C  
ATOM   4592  O   GLN C 286      14.370  23.884  40.501  1.00  0.00           O  
ATOM   4593  N   ARG C 287      14.576  25.065  38.592  1.00  0.00           N  
ATOM   4594  H   ARG C 287      14.167  25.225  37.678  1.00  0.00           H  
ATOM   4595  CA  ARG C 287      15.903  25.652  38.865  1.00  0.00           C  
ATOM   4596  HA  ARG C 287      16.561  24.862  39.232  1.00  0.00           H  
ATOM   4597  CB  ARG C 287      16.462  26.217  37.547  1.00  0.00           C  
ATOM   4598  HB2 ARG C 287      16.134  25.582  36.722  1.00  0.00           H  
ATOM   4599  HB3 ARG C 287      16.060  27.219  37.387  1.00  0.00           H  
ATOM   4600  CG  ARG C 287      17.998  26.275  37.512  1.00  0.00           C  
ATOM   4601  HG2 ARG C 287      18.370  26.781  38.402  1.00  0.00           H  
ATOM   4602  HG3 ARG C 287      18.389  25.259  37.498  1.00  0.00           H  
ATOM   4603  CD  ARG C 287      18.530  27.005  36.272  1.00  0.00           C  
ATOM   4604  HD2 ARG C 287      18.267  28.058  36.344  1.00  0.00           H  
ATOM   4605  HD3 ARG C 287      19.619  26.933  36.273  1.00  0.00           H  
ATOM   4606  NE  ARG C 287      18.010  26.427  35.018  1.00  0.00           N  
ATOM   4607  HE  ARG C 287      18.049  25.416  34.925  1.00  0.00           H  
ATOM   4608  CZ  ARG C 287      17.496  27.067  33.984  1.00  0.00           C  
ATOM   4609  NH1 ARG C 287      17.284  28.349  33.972  1.00  0.00           N  
ATOM   4610 1HH1 ARG C 287      17.384  28.901  34.811  1.00  0.00           H  
ATOM   4611 2HH1 ARG C 287      16.854  28.768  33.142  1.00  0.00           H  
ATOM   4612  NH2 ARG C 287      17.172  26.400  32.919  1.00  0.00           N  
ATOM   4613 1HH2 ARG C 287      17.251  25.397  32.924  1.00  0.00           H  
ATOM   4614 2HH2 ARG C 287      16.860  26.904  32.085  1.00  0.00           H  
ATOM   4615  C   ARG C 287      15.859  26.737  39.951  1.00  0.00           C  
ATOM   4616  O   ARG C 287      16.802  26.878  40.727  1.00  0.00           O  
ATOM   4617  N   GLY C 288      14.780  27.523  39.977  1.00  0.00           N  
ATOM   4618  H   GLY C 288      14.078  27.364  39.265  1.00  0.00           H  
ATOM   4619  CA  GLY C 288      14.480  28.528  41.001  1.00  0.00           C  
ATOM   4620  HA2 GLY C 288      15.378  28.760  41.575  1.00  0.00           H  
ATOM   4621  HA3 GLY C 288      14.148  29.441  40.507  1.00  0.00           H  
ATOM   4622  C   GLY C 288      13.385  28.091  41.979  1.00  0.00           C  
ATOM   4623  O   GLY C 288      12.906  26.959  41.948  1.00  0.00           O  
ATOM   4624  N   GLY C 289      12.953  29.016  42.839  1.00  0.00           N  
ATOM   4625  H   GLY C 289      13.328  29.952  42.769  1.00  0.00           H  
ATOM   4626  CA  GLY C 289      11.862  28.777  43.787  1.00  0.00           C  
ATOM   4627  HA2 GLY C 289      11.521  29.732  44.175  1.00  0.00           H  
ATOM   4628  HA3 GLY C 289      11.029  28.334  43.239  1.00  0.00           H  
ATOM   4629  C   GLY C 289      12.203  27.848  44.970  1.00  0.00           C  
ATOM   4630  O   GLY C 289      13.359  27.462  45.170  1.00  0.00           O  
ATOM   4631  N   PRO C 290      11.211  27.520  45.823  1.00  0.00           N  
ATOM   4632  CD  PRO C 290      11.354  26.549  46.900  1.00  0.00           C  
ATOM   4633  HD2 PRO C 290      12.202  26.789  47.542  1.00  0.00           H  
ATOM   4634  HD3 PRO C 290      11.480  25.555  46.471  1.00  0.00           H  
ATOM   4635  CG  PRO C 290      10.049  26.603  47.699  1.00  0.00           C  
ATOM   4636  HG2 PRO C 290      10.143  27.327  48.510  1.00  0.00           H  
ATOM   4637  HG3 PRO C 290       9.774  25.622  48.091  1.00  0.00           H  
ATOM   4638  CB  PRO C 290       9.037  27.106  46.670  1.00  0.00           C  
ATOM   4639  HB2 PRO C 290       8.176  27.581  47.146  1.00  0.00           H  
ATOM   4640  HB3 PRO C 290       8.709  26.275  46.044  1.00  0.00           H  
ATOM   4641  CA  PRO C 290       9.858  28.087  45.826  1.00  0.00           C  
ATOM   4642  HA  PRO C 290       9.441  28.113  44.819  1.00  0.00           H  
ATOM   4643  C   PRO C 290       9.798  29.511  46.412  1.00  0.00           C  
ATOM   4644  O   PRO C 290       8.770  30.165  46.279  1.00  0.00           O  
ATOM   4645  N   VAL C 291      10.881  29.985  47.050  1.00  0.00           N  
ATOM   4646  H   VAL C 291      11.689  29.383  47.090  1.00  0.00           H  
ATOM   4647  CA  VAL C 291      10.945  31.235  47.840  1.00  0.00           C  
ATOM   4648  HA  VAL C 291      11.874  31.184  48.408  1.00  0.00           H  
ATOM   4649  CB  VAL C 291      11.056  32.512  46.973  1.00  0.00           C  
ATOM   4650  HB  VAL C 291      10.090  32.750  46.529  1.00  0.00           H  
ATOM   4651  CG1 VAL C 291      11.531  33.699  47.825  1.00  0.00           C  
ATOM   4652 1HG1 VAL C 291      12.509  33.488  48.261  1.00  0.00           H  
ATOM   4653 2HG1 VAL C 291      11.611  34.593  47.205  1.00  0.00           H  
ATOM   4654 3HG1 VAL C 291      10.819  33.903  48.623  1.00  0.00           H  
ATOM   4655  CG2 VAL C 291      12.084  32.350  45.842  1.00  0.00           C  
ATOM   4656 1HG2 VAL C 291      11.699  31.667  45.091  1.00  0.00           H  
ATOM   4657 2HG2 VAL C 291      12.251  33.309  45.353  1.00  0.00           H  
ATOM   4658 3HG2 VAL C 291      13.032  31.982  46.234  1.00  0.00           H  
ATOM   4659  C   VAL C 291       9.827  31.284  48.892  1.00  0.00           C  
ATOM   4660  O   VAL C 291       8.920  32.117  48.871  1.00  0.00           O  
ATOM   4661  N   ASP C 292       9.877  30.322  49.812  1.00  0.00           N  
ATOM   4662  H   ASP C 292      10.651  29.682  49.789  1.00  0.00           H  
ATOM   4663  CA  ASP C 292       8.978  30.251  50.965  1.00  0.00           C  
ATOM   4664  HA  ASP C 292       7.964  30.497  50.645  1.00  0.00           H  
ATOM   4665  CB  ASP C 292       8.979  28.809  51.490  1.00  0.00           C  
ATOM   4666  HB2 ASP C 292       8.808  28.126  50.655  1.00  0.00           H  
ATOM   4667  HB3 ASP C 292       9.954  28.577  51.922  1.00  0.00           H  
ATOM   4668  CG  ASP C 292       7.894  28.588  52.541  1.00  0.00           C  
ATOM   4669  OD1 ASP C 292       7.975  29.206  53.624  1.00  0.00           O  
ATOM   4670  OD2 ASP C 292       6.954  27.810  52.258  1.00  0.00           O  
ATOM   4671  C   ASP C 292       9.417  31.260  52.042  1.00  0.00           C  
ATOM   4672  O   ASP C 292      10.608  31.354  52.348  1.00  0.00           O  
ATOM   4673  N   LEU C 293       8.475  31.993  52.649  1.00  0.00           N  
ATOM   4674  H   LEU C 293       7.512  31.827  52.397  1.00  0.00           H  
ATOM   4675  CA  LEU C 293       8.759  33.019  53.666  1.00  0.00           C  
ATOM   4676  HA  LEU C 293       9.454  33.744  53.242  1.00  0.00           H  
ATOM   4677  CB  LEU C 293       7.449  33.742  54.040  1.00  0.00           C  
ATOM   4678  HB2 LEU C 293       6.738  32.998  54.406  1.00  0.00           H  
ATOM   4679  HB3 LEU C 293       7.656  34.429  54.863  1.00  0.00           H  
ATOM   4680  CG  LEU C 293       6.787  34.545  52.903  1.00  0.00           C  
ATOM   4681  HG  LEU C 293       6.569  33.881  52.066  1.00  0.00           H  
ATOM   4682  CD1 LEU C 293       5.467  35.135  53.401  1.00  0.00           C  
ATOM   4683 1HD1 LEU C 293       5.649  35.805  54.242  1.00  0.00           H  
ATOM   4684 2HD1 LEU C 293       4.985  35.696  52.600  1.00  0.00           H  
ATOM   4685 3HD1 LEU C 293       4.800  34.335  53.721  1.00  0.00           H  
ATOM   4686  CD2 LEU C 293       7.671  35.692  52.408  1.00  0.00           C  
ATOM   4687 1HD2 LEU C 293       8.569  35.294  51.940  1.00  0.00           H  
ATOM   4688 2HD2 LEU C 293       7.128  36.281  51.668  1.00  0.00           H  
ATOM   4689 3HD2 LEU C 293       7.947  36.337  53.243  1.00  0.00           H  
ATOM   4690  C   LEU C 293       9.443  32.473  54.936  1.00  0.00           C  
ATOM   4691  O   LEU C 293      10.082  33.237  55.660  1.00  0.00           O  
ATOM   4692  N   THR C 294       9.352  31.166  55.199  1.00  0.00           N  
ATOM   4693  H   THR C 294       8.796  30.587  54.571  1.00  0.00           H  
ATOM   4694  CA  THR C 294      10.060  30.500  56.308  1.00  0.00           C  
ATOM   4695  HA  THR C 294      10.019  31.145  57.184  1.00  0.00           H  
ATOM   4696  CB  THR C 294       9.401  29.163  56.683  1.00  0.00           C  
ATOM   4697  HB  THR C 294       9.968  28.720  57.504  1.00  0.00           H  
ATOM   4698  CG2 THR C 294       7.952  29.328  57.141  1.00  0.00           C  
ATOM   4699 1HG2 THR C 294       7.335  29.713  56.329  1.00  0.00           H  
ATOM   4700 2HG2 THR C 294       7.564  28.358  57.455  1.00  0.00           H  
ATOM   4701 3HG2 THR C 294       7.911  30.016  57.985  1.00  0.00           H  
ATOM   4702  OG1 THR C 294       9.415  28.263  55.600  1.00  0.00           O  
ATOM   4703  HG1 THR C 294       8.778  28.589  54.925  1.00  0.00           H  
ATOM   4704  C   THR C 294      11.543  30.247  56.023  1.00  0.00           C  
ATOM   4705  O   THR C 294      12.328  30.143  56.962  1.00  0.00           O  
ATOM   4706  N   LEU C 295      11.940  30.172  54.745  1.00  0.00           N  
ATOM   4707  H   LEU C 295      11.227  30.289  54.034  1.00  0.00           H  
ATOM   4708  CA  LEU C 295      13.311  29.864  54.312  1.00  0.00           C  
ATOM   4709  HA  LEU C 295      13.914  29.586  55.178  1.00  0.00           H  
ATOM   4710  CB  LEU C 295      13.282  28.672  53.333  1.00  0.00           C  
ATOM   4711  HB2 LEU C 295      12.744  28.978  52.434  1.00  0.00           H  
ATOM   4712  HB3 LEU C 295      14.309  28.445  53.042  1.00  0.00           H  
ATOM   4713  CG  LEU C 295      12.631  27.382  53.870  1.00  0.00           C  
ATOM   4714  HG  LEU C 295      11.585  27.573  54.103  1.00  0.00           H  
ATOM   4715  CD1 LEU C 295      12.681  26.296  52.795  1.00  0.00           C  
ATOM   4716 1HD1 LEU C 295      13.713  26.039  52.564  1.00  0.00           H  
ATOM   4717 2HD1 LEU C 295      12.162  25.405  53.152  1.00  0.00           H  
ATOM   4718 3HD1 LEU C 295      12.181  26.648  51.894  1.00  0.00           H  
ATOM   4719  CD2 LEU C 295      13.330  26.843  55.121  1.00  0.00           C  
ATOM   4720 1HD2 LEU C 295      13.216  27.555  55.939  1.00  0.00           H  
ATOM   4721 2HD2 LEU C 295      12.861  25.904  55.414  1.00  0.00           H  
ATOM   4722 3HD2 LEU C 295      14.388  26.683  54.915  1.00  0.00           H  
ATOM   4723  C   LEU C 295      14.019  31.062  53.665  1.00  0.00           C  
ATOM   4724  O   LEU C 295      15.246  31.135  53.699  1.00  0.00           O  
ATOM   4725  N   LYS C 296      13.256  31.972  53.042  1.00  0.00           N  
ATOM   4726  H   LYS C 296      12.259  31.776  53.038  1.00  0.00           H  
ATOM   4727  CA  LYS C 296      13.673  33.203  52.335  1.00  0.00           C  
ATOM   4728  HA  LYS C 296      12.789  33.578  51.817  1.00  0.00           H  
ATOM   4729  CB  LYS C 296      14.077  34.286  53.348  1.00  0.00           C  
ATOM   4730  HB2 LYS C 296      14.988  33.970  53.861  1.00  0.00           H  
ATOM   4731  HB3 LYS C 296      14.296  35.206  52.803  1.00  0.00           H  
ATOM   4732  CG  LYS C 296      12.988  34.589  54.394  1.00  0.00           C  
ATOM   4733  HG2 LYS C 296      12.062  34.879  53.894  1.00  0.00           H  
ATOM   4734  HG3 LYS C 296      12.804  33.707  55.008  1.00  0.00           H  
ATOM   4735  CD  LYS C 296      13.466  35.731  55.295  1.00  0.00           C  
ATOM   4736  HD2 LYS C 296      14.425  35.449  55.730  1.00  0.00           H  
ATOM   4737  HD3 LYS C 296      13.607  36.627  54.687  1.00  0.00           H  
ATOM   4738  CE  LYS C 296      12.478  36.036  56.424  1.00  0.00           C  
ATOM   4739  HE2 LYS C 296      11.520  36.337  55.990  1.00  0.00           H  
ATOM   4740  HE3 LYS C 296      12.317  35.127  57.013  1.00  0.00           H  
ATOM   4741  NZ  LYS C 296      13.020  37.119  57.278  1.00  0.00           N  
ATOM   4742  HZ1 LYS C 296      13.138  37.968  56.724  1.00  0.00           H  
ATOM   4743  HZ2 LYS C 296      12.432  37.345  58.067  1.00  0.00           H  
ATOM   4744  HZ3 LYS C 296      13.955  36.886  57.610  1.00  0.00           H  
ATOM   4745  C   LYS C 296      14.716  33.034  51.211  1.00  0.00           C  
ATOM   4746  O   LYS C 296      15.048  34.003  50.539  1.00  0.00           O  
ATOM   4747  N   GLN C 297      15.187  31.814  50.962  1.00  0.00           N  
ATOM   4748  H   GLN C 297      14.899  31.085  51.595  1.00  0.00           H  
ATOM   4749  CA  GLN C 297      16.104  31.439  49.887  1.00  0.00           C  
ATOM   4750  HA  GLN C 297      16.390  32.335  49.335  1.00  0.00           H  
ATOM   4751  CB  GLN C 297      17.375  30.798  50.475  1.00  0.00           C  
ATOM   4752  HB2 GLN C 297      17.102  29.876  50.987  1.00  0.00           H  
ATOM   4753  HB3 GLN C 297      18.025  30.535  49.641  1.00  0.00           H  
ATOM   4754  CG  GLN C 297      18.190  31.664  51.447  1.00  0.00           C  
ATOM   4755  HG2 GLN C 297      18.354  32.650  51.010  1.00  0.00           H  
ATOM   4756  HG3 GLN C 297      17.648  31.785  52.386  1.00  0.00           H  
ATOM   4757  CD  GLN C 297      19.548  31.015  51.715  1.00  0.00           C  
ATOM   4758  OE1 GLN C 297      20.520  31.298  51.032  1.00  0.00           O  
ATOM   4759  NE2 GLN C 297      19.654  30.094  52.653  1.00  0.00           N  
ATOM   4760 1HE2 GLN C 297      20.547  29.606  52.790  1.00  0.00           H  
ATOM   4761 2HE2 GLN C 297      18.878  29.885  53.253  1.00  0.00           H  
ATOM   4762  C   GLN C 297      15.430  30.444  48.918  1.00  0.00           C  
ATOM   4763  O   GLN C 297      14.565  29.669  49.343  1.00  0.00           O  
ATOM   4764  N   PRO C 298      15.833  30.392  47.635  1.00  0.00           N  
ATOM   4765  CD  PRO C 298      16.714  31.328  46.949  1.00  0.00           C  
ATOM   4766  HD2 PRO C 298      17.584  31.582  47.551  1.00  0.00           H  
ATOM   4767  HD3 PRO C 298      16.153  32.232  46.702  1.00  0.00           H  
ATOM   4768  CG  PRO C 298      17.149  30.624  45.665  1.00  0.00           C  
ATOM   4769  HG2 PRO C 298      18.036  30.021  45.862  1.00  0.00           H  
ATOM   4770  HG3 PRO C 298      17.339  31.334  44.857  1.00  0.00           H  
ATOM   4771  CB  PRO C 298      15.959  29.714  45.358  1.00  0.00           C  
ATOM   4772  HB2 PRO C 298      16.239  28.868  44.729  1.00  0.00           H  
ATOM   4773  HB3 PRO C 298      15.170  30.296  44.878  1.00  0.00           H  
ATOM   4774  CA  PRO C 298      15.494  29.278  46.750  1.00  0.00           C  
ATOM   4775  HA  PRO C 298      14.414  29.137  46.742  1.00  0.00           H  
ATOM   4776  C   PRO C 298      16.162  27.970  47.214  1.00  0.00           C  
ATOM   4777  O   PRO C 298      17.221  27.984  47.852  1.00  0.00           O  
ATOM   4778  N   ARG C 299      15.567  26.813  46.887  1.00  0.00           N  
ATOM   4779  H   ARG C 299      14.735  26.860  46.301  1.00  0.00           H  
ATOM   4780  CA  ARG C 299      15.991  25.511  47.445  1.00  0.00           C  
ATOM   4781  HA  ARG C 299      16.035  25.635  48.528  1.00  0.00           H  
ATOM   4782  CB  ARG C 299      14.940  24.420  47.152  1.00  0.00           C  
ATOM   4783  HB2 ARG C 299      13.966  24.781  47.488  1.00  0.00           H  
ATOM   4784  HB3 ARG C 299      14.888  24.225  46.079  1.00  0.00           H  
ATOM   4785  CG  ARG C 299      15.273  23.112  47.904  1.00  0.00           C  
ATOM   4786  HG2 ARG C 299      16.056  22.572  47.369  1.00  0.00           H  
ATOM   4787  HG3 ARG C 299      15.661  23.370  48.890  1.00  0.00           H  
ATOM   4788  CD  ARG C 299      14.081  22.172  48.135  1.00  0.00           C  
ATOM   4789  HD2 ARG C 299      14.425  21.371  48.792  1.00  0.00           H  
ATOM   4790  HD3 ARG C 299      13.293  22.717  48.660  1.00  0.00           H  
ATOM   4791  NE  ARG C 299      13.531  21.584  46.897  1.00  0.00           N  
ATOM   4792  HE  ARG C 299      13.751  22.031  46.025  1.00  0.00           H  
ATOM   4793  CZ  ARG C 299      12.701  20.553  46.857  1.00  0.00           C  
ATOM   4794  NH1 ARG C 299      12.386  19.844  47.897  1.00  0.00           N  
ATOM   4795 1HH1 ARG C 299      12.915  19.916  48.766  1.00  0.00           H  
ATOM   4796 2HH1 ARG C 299      11.729  19.085  47.783  1.00  0.00           H  
ATOM   4797  NH2 ARG C 299      12.133  20.180  45.748  1.00  0.00           N  
ATOM   4798 1HH2 ARG C 299      12.305  20.647  44.880  1.00  0.00           H  
ATOM   4799 2HH2 ARG C 299      11.498  19.385  45.805  1.00  0.00           H  
ATOM   4800  C   ARG C 299      17.414  25.103  47.038  1.00  0.00           C  
ATOM   4801  O   ARG C 299      18.083  24.420  47.807  1.00  0.00           O  
ATOM   4802  N   CYS C 300      17.913  25.587  45.901  1.00  0.00           N  
ATOM   4803  H   CYS C 300      17.326  26.175  45.328  1.00  0.00           H  
ATOM   4804  CA  CYS C 300      19.310  25.424  45.494  1.00  0.00           C  
ATOM   4805  HA  CYS C 300      19.538  24.358  45.434  1.00  0.00           H  
ATOM   4806  CB  CYS C 300      19.480  26.022  44.089  1.00  0.00           C  
ATOM   4807  HB2 CYS C 300      20.531  25.962  43.808  1.00  0.00           H  
ATOM   4808  HB3 CYS C 300      18.898  25.446  43.367  1.00  0.00           H  
ATOM   4809  SG  CYS C 300      18.942  27.759  44.042  1.00  0.00           S  
ATOM   4810  HG  CYS C 300      19.218  27.989  42.748  1.00  0.00           H  
ATOM   4811  C   CYS C 300      20.314  26.027  46.500  1.00  0.00           C  
ATOM   4812  O   CYS C 300      21.382  25.456  46.708  1.00  0.00           O  
ATOM   4813  N   PHE C 301      19.977  27.122  47.191  1.00  0.00           N  
ATOM   4814  H   PHE C 301      19.085  27.566  47.004  1.00  0.00           H  
ATOM   4815  CA  PHE C 301      20.833  27.692  48.238  1.00  0.00           C  
ATOM   4816  HA  PHE C 301      21.875  27.491  47.999  1.00  0.00           H  
ATOM   4817  CB  PHE C 301      20.659  29.214  48.281  1.00  0.00           C  
ATOM   4818  HB2 PHE C 301      19.609  29.430  48.473  1.00  0.00           H  
ATOM   4819  HB3 PHE C 301      21.230  29.581  49.133  1.00  0.00           H  
ATOM   4820  CG  PHE C 301      21.102  30.005  47.054  1.00  0.00           C  
ATOM   4821  CD1 PHE C 301      20.549  31.282  46.835  1.00  0.00           C  
ATOM   4822  HD1 PHE C 301      19.821  31.677  47.527  1.00  0.00           H  
ATOM   4823  CE1 PHE C 301      20.956  32.061  45.736  1.00  0.00           C  
ATOM   4824  HE1 PHE C 301      20.525  33.040  45.573  1.00  0.00           H  
ATOM   4825  CZ  PHE C 301      21.942  31.578  44.861  1.00  0.00           C  
ATOM   4826  HZ  PHE C 301      22.272  32.184  44.030  1.00  0.00           H  
ATOM   4827  CE2 PHE C 301      22.498  30.305  45.068  1.00  0.00           C  
ATOM   4828  HE2 PHE C 301      23.246  29.926  44.385  1.00  0.00           H  
ATOM   4829  CD2 PHE C 301      22.080  29.520  46.157  1.00  0.00           C  
ATOM   4830  HD2 PHE C 301      22.525  28.546  46.290  1.00  0.00           H  
ATOM   4831  C   PHE C 301      20.606  27.036  49.607  1.00  0.00           C  
ATOM   4832  O   PHE C 301      21.575  26.780  50.316  1.00  0.00           O  
ATOM   4833  N   VAL C 302      19.371  26.645  49.941  1.00  0.00           N  
ATOM   4834  H   VAL C 302      18.607  26.893  49.325  1.00  0.00           H  
ATOM   4835  CA  VAL C 302      19.088  25.875  51.174  1.00  0.00           C  
ATOM   4836  HA  VAL C 302      19.448  26.450  52.030  1.00  0.00           H  
ATOM   4837  CB  VAL C 302      17.569  25.647  51.345  1.00  0.00           C  
ATOM   4838  HB  VAL C 302      17.200  25.069  50.498  1.00  0.00           H  
ATOM   4839  CG1 VAL C 302      17.235  24.880  52.632  1.00  0.00           C  
ATOM   4840 1HG1 VAL C 302      17.638  25.408  53.497  1.00  0.00           H  
ATOM   4841 2HG1 VAL C 302      16.153  24.786  52.740  1.00  0.00           H  
ATOM   4842 3HG1 VAL C 302      17.658  23.877  52.596  1.00  0.00           H  
ATOM   4843  CG2 VAL C 302      16.803  26.977  51.393  1.00  0.00           C  
ATOM   4844 1HG2 VAL C 302      16.934  27.528  50.464  1.00  0.00           H  
ATOM   4845 2HG2 VAL C 302      15.738  26.789  51.521  1.00  0.00           H  
ATOM   4846 3HG2 VAL C 302      17.163  27.585  52.224  1.00  0.00           H  
ATOM   4847  C   VAL C 302      19.844  24.535  51.182  1.00  0.00           C  
ATOM   4848  O   VAL C 302      20.406  24.137  52.201  1.00  0.00           O  
ATOM   4849  N   LEU C 303      19.920  23.857  50.032  1.00  0.00           N  
ATOM   4850  H   LEU C 303      19.401  24.203  49.233  1.00  0.00           H  
ATOM   4851  CA  LEU C 303      20.673  22.607  49.878  1.00  0.00           C  
ATOM   4852  HA  LEU C 303      20.483  22.000  50.764  1.00  0.00           H  
ATOM   4853  CB  LEU C 303      20.091  21.866  48.659  1.00  0.00           C  
ATOM   4854  HB2 LEU C 303      19.010  21.795  48.791  1.00  0.00           H  
ATOM   4855  HB3 LEU C 303      20.271  22.468  47.769  1.00  0.00           H  
ATOM   4856  CG  LEU C 303      20.632  20.444  48.414  1.00  0.00           C  
ATOM   4857  HG  LEU C 303      21.695  20.493  48.181  1.00  0.00           H  
ATOM   4858  CD1 LEU C 303      20.417  19.505  49.603  1.00  0.00           C  
ATOM   4859 1HD1 LEU C 303      19.366  19.500  49.896  1.00  0.00           H  
ATOM   4860 2HD1 LEU C 303      20.719  18.494  49.332  1.00  0.00           H  
ATOM   4861 3HD1 LEU C 303      21.027  19.824  50.443  1.00  0.00           H  
ATOM   4862  CD2 LEU C 303      19.893  19.835  47.223  1.00  0.00           C  
ATOM   4863 1HD2 LEU C 303      19.964  20.498  46.363  1.00  0.00           H  
ATOM   4864 2HD2 LEU C 303      20.346  18.877  46.965  1.00  0.00           H  
ATOM   4865 3HD2 LEU C 303      18.842  19.681  47.464  1.00  0.00           H  
ATOM   4866  C   LEU C 303      22.200  22.832  49.815  1.00  0.00           C  
ATOM   4867  O   LEU C 303      22.961  21.959  50.227  1.00  0.00           O  
ATOM   4868  N   MET C 304      22.660  24.017  49.394  1.00  0.00           N  
ATOM   4869  H   MET C 304      21.991  24.710  49.091  1.00  0.00           H  
ATOM   4870  CA  MET C 304      24.071  24.420  49.497  1.00  0.00           C  
ATOM   4871  HA  MET C 304      24.689  23.636  49.054  1.00  0.00           H  
ATOM   4872  CB  MET C 304      24.294  25.715  48.700  1.00  0.00           C  
ATOM   4873  HB2 MET C 304      23.951  25.556  47.680  1.00  0.00           H  
ATOM   4874  HB3 MET C 304      23.712  26.521  49.135  1.00  0.00           H  
ATOM   4875  CG  MET C 304      25.756  26.163  48.648  1.00  0.00           C  
ATOM   4876  HG2 MET C 304      26.047  26.569  49.617  1.00  0.00           H  
ATOM   4877  HG3 MET C 304      26.377  25.291  48.447  1.00  0.00           H  
ATOM   4878  SD  MET C 304      26.081  27.399  47.357  1.00  0.00           S  
ATOM   4879  CE  MET C 304      25.188  28.835  48.009  1.00  0.00           C  
ATOM   4880  HE1 MET C 304      25.662  29.153  48.935  1.00  0.00           H  
ATOM   4881  HE2 MET C 304      25.230  29.652  47.288  1.00  0.00           H  
ATOM   4882  HE3 MET C 304      24.146  28.581  48.201  1.00  0.00           H  
ATOM   4883  C   MET C 304      24.504  24.576  50.964  1.00  0.00           C  
ATOM   4884  O   MET C 304      25.540  24.043  51.357  1.00  0.00           O  
ATOM   4885  N   ASP C 305      23.680  25.216  51.800  1.00  0.00           N  
ATOM   4886  H   ASP C 305      22.854  25.670  51.421  1.00  0.00           H  
ATOM   4887  CA  ASP C 305      23.925  25.296  53.247  1.00  0.00           C  
ATOM   4888  HA  ASP C 305      24.927  25.702  53.388  1.00  0.00           H  
ATOM   4889  CB  ASP C 305      22.946  26.285  53.908  1.00  0.00           C  
ATOM   4890  HB2 ASP C 305      21.928  25.908  53.792  1.00  0.00           H  
ATOM   4891  HB3 ASP C 305      23.168  26.334  54.976  1.00  0.00           H  
ATOM   4892  CG  ASP C 305      23.029  27.705  53.331  1.00  0.00           C  
ATOM   4893  OD1 ASP C 305      21.989  28.392  53.200  1.00  0.00           O  
ATOM   4894  OD2 ASP C 305      24.153  28.175  53.035  1.00  0.00           O  
ATOM   4895  C   ASP C 305      23.914  23.914  53.930  1.00  0.00           C  
ATOM   4896  O   ASP C 305      24.713  23.673  54.838  1.00  0.00           O  
ATOM   4897  N   HIS C 306      23.096  22.967  53.450  1.00  0.00           N  
ATOM   4898  H   HIS C 306      22.441  23.238  52.726  1.00  0.00           H  
ATOM   4899  CA  HIS C 306      23.099  21.567  53.910  1.00  0.00           C  
ATOM   4900  HA  HIS C 306      22.985  21.557  54.995  1.00  0.00           H  
ATOM   4901  CB  HIS C 306      21.886  20.845  53.301  1.00  0.00           C  
ATOM   4902  HB2 HIS C 306      21.007  21.479  53.420  1.00  0.00           H  
ATOM   4903  HB3 HIS C 306      22.057  20.722  52.235  1.00  0.00           H  
ATOM   4904  CG  HIS C 306      21.543  19.489  53.876  1.00  0.00           C  
ATOM   4905  ND1 HIS C 306      20.587  19.248  54.872  1.00  0.00           N  
ATOM   4906  CE1 HIS C 306      20.446  17.912  54.927  1.00  0.00           C  
ATOM   4907  HE1 HIS C 306      19.758  17.388  55.579  1.00  0.00           H  
ATOM   4908  NE2 HIS C 306      21.262  17.312  54.044  1.00  0.00           N  
ATOM   4909  HE2 HIS C 306      21.291  16.314  53.864  1.00  0.00           H  
ATOM   4910  CD2 HIS C 306      21.959  18.290  53.368  1.00  0.00           C  
ATOM   4911  HD2 HIS C 306      22.644  18.150  52.543  1.00  0.00           H  
ATOM   4912  C   HIS C 306      24.430  20.863  53.591  1.00  0.00           C  
ATOM   4913  O   HIS C 306      25.018  20.253  54.484  1.00  0.00           O  
TER    4914      HIS C 306 
HETATM 4915  N1  UNK     0      39.006  42.112  35.932  1.00  0.00           N  
HETATM 4916  C2  UNK     0      38.077  42.613  35.111  1.00  0.00           C  
HETATM 4917  N3  UNK     0      38.056  42.314  33.815  1.00  0.00           N  
HETATM 4918  C4  UNK     0      38.986  41.502  33.349  1.00  0.00           C  
HETATM 4919  C5  UNK     0      39.961  40.966  34.154  1.00  0.00           C  
HETATM 4920  C6  UNK     0      39.969  41.287  35.516  1.00  0.00           C  
HETATM 4921  N7  UNK     0      39.146  41.077  32.104  1.00  0.00           N  
HETATM 4922  C8  UNK     0      40.198  40.266  32.026  1.00  0.00           C  
HETATM 4923  C9  UNK     0      40.745  40.179  33.304  1.00  0.00           C  
HETATM 4924  N10 UNK     0      37.073  43.494  35.626  1.00  0.00           N  
HETATM 4925  C11 UNK     0      40.955  40.793  36.526  1.00  0.00           C  
HETATM 4926  C12 UNK     0      41.885  39.372  33.580  1.00  0.00           C  
HETATM 4927  N13 UNK     0      42.809  38.721  33.802  1.00  0.00           N  
HETATM 4928  C14 UNK     0      41.489  41.646  37.472  1.00  0.00           C  
HETATM 4929  C15 UNK     0      42.400  41.215  38.416  1.00  0.00           C  
HETATM 4930  C16 UNK     0      42.792  39.890  38.421  1.00  0.00           C  
HETATM 4931  C17 UNK     0      42.272  39.008  37.478  1.00  0.00           C  
HETATM 4932  C18 UNK     0      41.353  39.459  36.531  1.00  0.00           C  
HETATM 4933  S19 UNK     0      43.956  39.378  39.628  1.00  0.00           S  
HETATM 4934  N20 UNK     0      43.397  37.959  40.366  1.00  0.00           N  
HETATM 4935  O21 UNK     0      45.286  39.105  38.949  1.00  0.00           O  
HETATM 4936  O22 UNK     0      44.134  40.470  40.665  1.00  0.00           O  
HETATM 4937  H23 UNK     0      38.568  41.327  31.340  1.00  0.00           H
[truncated: 1,486 more chars]
